# Supplementary material for: The Impact of Academic Achievement and Parental Practices on Depressive Symptom Trajectories Among Chinese Adolescents
Source: Res Child Adolesc Psychopathol. 2021 May 13;49(10):1359–71. doi: 10.1007/s10802-021-00826-9 (PMC8380233; doi:10.1007/s10802-021-00826-9)
Supplement: Supplementary file 2 — Supplementary file2 (CSV 43 KB) [file 10802_2021_826_MOESM2_ESM.out]

Mplus VERSION 7.11
MUTHEN & MUTHEN
12/14/2020   4:59 PM

INPUT INSTRUCTIONS

  TITLE: Growth Mixture Model

     DATA: FILE IS depressive trajectories and its predictors.dat;

      VARIABLE:  NAMES ARE IDALL SEX agetest1 F12 F13 F16
      zj1 PRNTIVL1 AUTOSUP1 PSYCTRL1
  DPRS1 DPRS2 DPRS3 DPRS4 FatherEdu MotherEdu Education
  schoolTy1 schoolTy2;

        USEVARIABLES ARE
            DPRS1 DPRS2 DPRS3 DPRS4;

             MISSING=ALL(99);
             CLASSES=c(4);
             auxiliary (r3step) zj1 PRNTIVL1 AUTOSUP1 PSYCTRL1
             SEX agetest1 F16 Education schoolTy1 schoolTy2;


    ANALYSIS: TYPE= MIXTURE;
    starts = 5000 100;
    MODEL:
             %OVERALL%
             i s | DPRS1@0 DPRS2@1 DPRS3@2 DPRS4@3;
             i with s@0;


    OUTPUT: SAMPSTAT  TECH1  TECH11 TECH14;

    PLOT: TYPE=PLOT3;
          Series=DPRS1 DPRS2 DPRS3 DPRS4 (*);


INPUT READING TERMINATED NORMALLY


Growth Mixture Model

SUMMARY OF ANALYSIS

Number of groups                                                 1
Number of observations                                        2576

Number of dependent variables                                    4
Number of independent variables                                  0
Number of continuous latent variables                            2
Number of categorical latent variables                           1

Observed dependent variables

  Continuous
   DPRS1       DPRS2       DPRS3       DPRS4

Observed auxiliary variables
   ZJ1         PRNTIVL1    AUTOSUP1    PSYCTRL1    SEX         AGETEST1
   F16         EDUCATION   SCHOOLTY1   SCHOOLTY2

Continuous latent variables
   I           S

Categorical latent variables
   C


Estimator                                                      MLR
Information matrix                                        OBSERVED
Optimization Specifications for the Quasi-Newton Algorithm for
Continuous Outcomes
  Maximum number of iterations                                 100
  Convergence criterion                                  0.100D-05
Optimization Specifications for the EM Algorithm
  Maximum number of iterations                                 500
  Convergence criteria
    Loglikelihood change                                 0.100D-06
    Relative loglikelihood change                        0.100D-06
    Derivative                                           0.100D-05
Optimization Specifications for the M step of the EM Algorithm for
Categorical Latent variables
  Number of M step iterations                                    1
  M step convergence criterion                           0.100D-05
  Basis for M step termination                           ITERATION
Optimization Specifications for the M step of the EM Algorithm for
Censored, Binary or Ordered Categorical (Ordinal), Unordered
Categorical (Nominal) and Count Outcomes
  Number of M step iterations                                    1
  M step convergence criterion                           0.100D-05
  Basis for M step termination                           ITERATION
  Maximum value for logit thresholds                            15
  Minimum value for logit thresholds                           -15
  Minimum expected cell size for chi-square              0.100D-01
Maximum number of iterations for H1                           2000
Convergence criterion for H1                             0.100D-03
Optimization algorithm                                         EMA
Random Starts Specifications
  Number of initial stage random starts                       5000
  Number of final stage optimizations                          100
  Number of initial stage iterations                            10
  Initial stage convergence criterion                    0.100D+01
  Random starts scale                                    0.500D+01
  Random seed for generating random starts                       0

Input data file(s)
  depressive trajectories and its predictors.dat
Input data format  FREE


SUMMARY OF DATA

     Number of missing data patterns             9
     Number of y missing data patterns           9
     Number of u missing data patterns           0


COVARIANCE COVERAGE OF DATA

Minimum covariance coverage value   0.100


     PROPORTION OF DATA PRESENT FOR Y


           Covariance Coverage
              DPRS1         DPRS2         DPRS3         DPRS4
              ________      ________      ________      ________
 DPRS1          1.000
 DPRS2          0.975         0.976
 DPRS3          0.941         0.934         0.942
 DPRS4          0.915         0.908         0.899         0.915


SAMPLE STATISTICS


     ESTIMATED SAMPLE STATISTICS


           Means
              DPRS1         DPRS2         DPRS3         DPRS4
              ________      ________      ________      ________
 1              0.492         0.533         0.523         0.525


           Covariances
              DPRS1         DPRS2         DPRS3         DPRS4
              ________      ________      ________      ________
 DPRS1          0.082
 DPRS2          0.056         0.093
 DPRS3          0.049         0.064         0.094
 DPRS4          0.046         0.061         0.068         0.102


           Correlations
              DPRS1         DPRS2         DPRS3         DPRS4
              ________      ________      ________      ________
 DPRS1          1.000
 DPRS2          0.642         1.000
 DPRS3          0.557         0.680         1.000
 DPRS4          0.505         0.623         0.697         1.000


     MAXIMUM LOG-LIKELIHOOD VALUE FOR THE UNRESTRICTED (H1) MODEL IS 113.435

RANDOM STARTS RESULTS RANKED FROM THE BEST TO THE WORST LOGLIKELIHOOD VALUES

Final stage loglikelihood values at local maxima, seeds, and initial stage start numbers:

             275.331  318596           3710
             275.331  260095           3780
             275.331  927789           2742
             275.331  560961           2422
             275.331  82152            2955
             275.331  128611           4121
             275.331  259758           1054
             275.331  36579            2265
             275.331  835113           4799
             275.331  220492           743
             275.331  392407           221
             275.331  371518           2959
             275.331  46437            153
             275.331  581196           921
             275.331  306663           4276
             275.331  725497           2415
             275.331  330772           2031
             275.331  926634           4573
             275.331  27690            2347
             275.331  32468            1606
             275.331  564016           1646
             275.331  779209           4998
             275.331  117391           710
             275.331  252020           1585
             275.331  785015           2245
             275.331  178181           753
             275.331  749212           3330
             275.331  171430           1672
             275.331  551762           4002
             275.331  462821           745
             275.331  127215           9
             275.331  812064           3427
             275.331  737516           4813
             269.977  884473           4574
             269.977  470570           3598
             269.977  114115           2007
             269.977  622860           259
             269.977  789564           2275
             269.977  932449           1956
             249.977  89970            223
             249.977  400299           4782
             249.977  237332           661
             249.977  573096           20
             249.977  446548           3875
             249.977  697297           3697
             249.977  117474           2515
             249.977  256938           4230
             249.977  80798            3616
             243.077  650354           577
             243.077  758647           951
             243.077  436673           4356
             243.077  704532           3637
             243.077  5262             2370
             243.077  652266           490
             243.077  408234           2840
             243.077  43897            2230
             243.077  798821           423
             240.942  404510           442
             240.942  862495           3657
             240.942  354559           73
             240.942  382139           3305
             240.942  310591           4901
             240.942  289928           1529
             240.942  39136            226
             240.942  323588           826
             240.942  511801           4897
             240.942  645664           39
             240.942  10968            1492
             240.942  781624           2462
             240.942  500273           3468
             240.942  166220           1502
             240.942  545756           1056
             240.942  804616           868
             240.942  708207           1158
             240.942  176373           4603
             240.942  681173           4972
             240.942  817593           2682
             240.942  911755           4164
             240.942  16258            3530
             240.942  816796           1728
             240.942  76974            16
             240.942  166256           2591
             240.942  317248           4215
             240.942  545140           278
             240.942  556929           734
             240.942  110389           3178
             240.942  988970           2492
             240.942  657861           3779
             240.942  921550           3934
             240.942  361694           1834
             240.942  344236           2061
             240.942  205005           2559
             240.942  813963           4182
             240.942  843278           3660
             240.942  409669           3746
             240.942  592206           4536
             240.942  570388           2819
             240.942  696225           4538
             240.942  565763           2231
             240.942  276071           1551


THE BEST LOGLIKELIHOOD VALUE HAS BEEN REPLICATED.  RERUN WITH AT LEAST TWICE THE
RANDOM STARTS TO CHECK THAT THE BEST LOGLIKELIHOOD IS STILL OBTAINED AND REPLICATED.


THE MODEL ESTIMATION TERMINATED NORMALLY


MODEL FIT INFORMATION

Number of Free Parameters                       17

Loglikelihood

          H0 Value                         275.331
          H0 Scaling Correction Factor      1.3547
            for MLR

Information Criteria

          Akaike (AIC)                    -516.662
          Bayesian (BIC)                  -417.144
          Sample-Size Adjusted BIC        -471.158
            (n* = (n + 2) / 24)


FINAL CLASS COUNTS AND PROPORTIONS FOR THE LATENT CLASSES
BASED ON THE ESTIMATED MODEL

    Latent
   Classes

       1        160.65740          0.06237
       2        259.78270          0.10085
       3        318.88368          0.12379
       4       1836.67622          0.71300


FINAL CLASS COUNTS AND PROPORTIONS FOR THE LATENT CLASS PATTERNS
BASED ON ESTIMATED POSTERIOR PROBABILITIES

    Latent
   Classes

       1        160.65739          0.06237
       2        259.78270          0.10085
       3        318.88369          0.12379
       4       1836.67622          0.71300


CLASSIFICATION QUALITY

     Entropy                         0.738


CLASSIFICATION OF INDIVIDUALS BASED ON THEIR MOST LIKELY LATENT CLASS MEMBERSHIP

Class Counts and Proportions

    Latent
   Classes

       1              126          0.04891
       2              234          0.09084
       3              279          0.10831
       4             1937          0.75194


Average Latent Class Probabilities for Most Likely Latent Class Membership (Row)
by Latent Class (Column)

           1        2        3        4

    1   0.733    0.138    0.000    0.129
    2   0.097    0.696    0.081    0.125
    3   0.001    0.071    0.768    0.160
    4   0.023    0.031    0.044    0.902


Classification Probabilities for the Most Likely Latent Class Membership (Row)
by Latent Class (Column)

           1        2        3        4

    1   0.575    0.141    0.001    0.282
    2   0.067    0.627    0.076    0.230
    3   0.000    0.060    0.672    0.268
    4   0.009    0.016    0.024    0.951


Logits for the Classification Probabilities for the Most Likely Latent Class Membership (Row)
by Latent Class (Column)

              1        2        3        4

    1      0.711   -0.691   -5.270    0.000
    2     -1.234    1.004   -1.104    0.000
    3     -7.391   -1.502    0.920    0.000
    4     -4.678   -4.087   -3.667    0.000


MODEL RESULTS

                                                    Two-Tailed
                    Estimate       S.E.  Est./S.E.    P-Value

Latent Class 1

 I        |
    DPRS1              1.000      0.000    999.000    999.000
    DPRS2              1.000      0.000    999.000    999.000
    DPRS3              1.000      0.000    999.000    999.000
    DPRS4              1.000      0.000    999.000    999.000

 S        |
    DPRS1              0.000      0.000    999.000    999.000
    DPRS2              1.000      0.000    999.000    999.000
    DPRS3              2.000      0.000    999.000    999.000
    DPRS4              3.000      0.000    999.000    999.000

 I        WITH
    S                  0.000      0.000    999.000    999.000

 Means
    I                  0.936      0.032     29.011      0.000
    S                 -0.157      0.020     -7.859      0.000

 Intercepts
    DPRS1              0.000      0.000    999.000    999.000
    DPRS2              0.000      0.000    999.000    999.000
    DPRS3              0.000      0.000    999.000    999.000
    DPRS4              0.000      0.000    999.000    999.000

 Variances
    I                  0.026      0.002     13.373      0.000
    S                  0.001      0.000      2.499      0.012

 Residual Variances
    DPRS1              0.023      0.001     15.582      0.000
    DPRS2              0.033      0.002     20.961      0.000
    DPRS3              0.031      0.002     19.584      0.000
    DPRS4              0.022      0.002     10.263      0.000

Latent Class 2

 I        |
    DPRS1              1.000      0.000    999.000    999.000
    DPRS2              1.000      0.000    999.000    999.000
    DPRS3              1.000      0.000    999.000    999.000
    DPRS4              1.000      0.000    999.000    999.000

 S        |
    DPRS1              0.000      0.000    999.000    999.000
    DPRS2              1.000      0.000    999.000    999.000
    DPRS3              2.000      0.000    999.000    999.000
    DPRS4              3.000      0.000    999.000    999.000

 I        WITH
    S                  0.000      0.000    999.000    999.000

 Means
    I                  0.919      0.037     25.042      0.000
    S                 -0.005      0.017     -0.316      0.752

 Intercepts
    DPRS1              0.000      0.000    999.000    999.000
    DPRS2              0.000      0.000    999.000    999.000
    DPRS3              0.000      0.000    999.000    999.000
    DPRS4              0.000      0.000    999.000    999.000

 Variances
    I                  0.026      0.002     13.373      0.000
    S                  0.001      0.000      2.499      0.012

 Residual Variances
    DPRS1              0.023      0.001     15.582      0.000
    DPRS2              0.033      0.002     20.961      0.000
    DPRS3              0.031      0.002     19.584      0.000
    DPRS4              0.022      0.002     10.263      0.000

Latent Class 3

 I        |
    DPRS1              1.000      0.000    999.000    999.000
    DPRS2              1.000      0.000    999.000    999.000
    DPRS3              1.000      0.000    999.000    999.000
    DPRS4              1.000      0.000    999.000    999.000

 S        |
    DPRS1              0.000      0.000    999.000    999.000
    DPRS2              1.000      0.000    999.000    999.000
    DPRS3              2.000      0.000    999.000    999.000
    DPRS4              3.000      0.000    999.000    999.000

 I        WITH
    S                  0.000      0.000    999.000    999.000

 Means
    I                  0.486      0.022     22.119      0.000
    S                  0.163      0.012     14.085      0.000

 Intercepts
    DPRS1              0.000      0.000    999.000    999.000
    DPRS2              0.000      0.000    999.000    999.000
    DPRS3              0.000      0.000    999.000    999.000
    DPRS4              0.000      0.000    999.000    999.000

 Variances
    I                  0.026      0.002     13.373      0.000
    S                  0.001      0.000      2.499      0.012

 Residual Variances
    DPRS1              0.023      0.001     15.582      0.000
    DPRS2              0.033      0.002     20.961      0.000
    DPRS3              0.031      0.002     19.584      0.000
    DPRS4              0.022      0.002     10.263      0.000

Latent Class 4

 I        |
    DPRS1              1.000      0.000    999.000    999.000
    DPRS2              1.000      0.000    999.000    999.000
    DPRS3              1.000      0.000    999.000    999.000
    DPRS4              1.000      0.000    999.000    999.000

 S        |
    DPRS1              0.000      0.000    999.000    999.000
    DPRS2              1.000      0.000    999.000    999.000
    DPRS3              2.000      0.000    999.000    999.000
    DPRS4              3.000      0.000    999.000    999.000

 I        WITH
    S                  0.000      0.000    999.000    999.000

 Means
    I                  0.408      0.009     46.399      0.000
    S                  0.000      0.003      0.004      0.997

 Intercepts
    DPRS1              0.000      0.000    999.000    999.000
    DPRS2              0.000      0.000    999.000    999.000
    DPRS3              0.000      0.000    999.000    999.000
    DPRS4              0.000      0.000    999.000    999.000

 Variances
    I                  0.026      0.002     13.373      0.000
    S                  0.001      0.000      2.499      0.012

 Residual Variances
    DPRS1              0.023      0.001     15.582      0.000
    DPRS2              0.033      0.002     20.961      0.000
    DPRS3              0.031      0.002     19.584      0.000
    DPRS4              0.022      0.002     10.263      0.000

Categorical Latent Variables

 Means
    C#1               -2.436      0.274     -8.885      0.000
    C#2               -1.956      0.226     -8.661      0.000
    C#3               -1.751      0.180     -9.740      0.000


QUALITY OF NUMERICAL RESULTS

     Condition Number for the Information Matrix              0.920E-05
       (ratio of smallest to largest eigenvalue)


TESTS OF CATEGORICAL LATENT VARIABLE MULTINOMIAL LOGISTIC REGRESSIONS USING
THE 3-STEP PROCEDURE

   WARNING:  LISTWISE DELETION IS APPLIED TO THE AUXILIARY VARIABLES IN THE
   ANALYSIS.  TO AVOID LISTWISE DELETION, DATA IMPUTATION CAN BE USED
   FOR THE AUXILIARY VARIABLES FOLLOWED BY ANALYSIS WITH TYPE=IMPUTATION.
   NUMBER OF DELETED OBSERVATIONS:  236
   NUMBER OF OBSERVATIONS USED:  2340

                                                    Two-Tailed
                    Estimate       S.E.  Est./S.E.    P-Value

 C#1      ON
    ZJ1                0.345      0.281      1.229      0.219
    PRNTIVL1          -0.354      0.284     -1.246      0.213
    AUTOSUP1          -0.416      0.277     -1.499      0.134
    PSYCTRL1           0.315      0.325      0.969      0.333
    SEX                0.147      0.302      0.488      0.626
    AGETEST1           0.157      0.296      0.533      0.594
    F16                0.208      0.192      1.083      0.279
    EDUCATIO          -0.043      0.081     -0.529      0.597
    SCHOOLTY           0.008      0.435      0.019      0.985
    SCHOOLTY           0.270      0.532      0.508      0.611

 C#2      ON
    ZJ1               -0.655      0.194     -3.369      0.001
    PRNTIVL1          -0.239      0.228     -1.050      0.294
    AUTOSUP1          -0.800      0.208     -3.844      0.000
    PSYCTRL1           0.425      0.215      1.975      0.048
    SEX                0.597      0.280      2.133      0.033
    AGETEST1           0.043      0.231      0.185      0.854
    F16                0.134      0.165      0.811      0.417
    EDUCATIO           0.053      0.071      0.737      0.461
    SCHOOLTY          -0.554      0.354     -1.565      0.118
    SCHOOLTY          -0.490      0.505     -0.970      0.332

 C#3      ON
    ZJ1               -0.041      0.143     -0.286      0.775
    PRNTIVL1           0.040      0.153      0.259      0.795
    AUTOSUP1          -0.174      0.139     -1.253      0.210
    PSYCTRL1           0.341      0.122      2.798      0.005
    SEX                0.195      0.194      1.007      0.314
    AGETEST1          -0.067      0.186     -0.360      0.719
    F16                0.250      0.127      1.970      0.049
    EDUCATIO           0.055      0.043      1.284      0.199
    SCHOOLTY           0.390      0.246      1.585      0.113
    SCHOOLTY           0.238      0.288      0.828      0.408

 Intercepts
    C#1               -3.279      4.787     -0.685      0.493
    C#2               -1.418      3.563     -0.398      0.691
    C#3               -3.051      2.616     -1.166      0.243

Parameterization using Reference Class 1

 C#2      ON
    ZJ1               -1.000      0.379     -2.637      0.008
    PRNTIVL1           0.115      0.426      0.271      0.787
    AUTOSUP1          -0.384      0.402     -0.955      0.340
    PSYCTRL1           0.110      0.467      0.235      0.814
    SEX                0.450      0.446      1.009      0.313
    AGETEST1          -0.115      0.433     -0.265      0.791
    F16               -0.075      0.271     -0.275      0.783
    EDUCATIO           0.096      0.126      0.759      0.448
    SCHOOLTY          -0.563      0.644     -0.874      0.382
    SCHOOLTY          -0.761      0.882     -0.862      0.388

 C#3      ON
    ZJ1               -0.386      0.292     -1.324      0.186
    PRNTIVL1           0.394      0.290      1.360      0.174
    AUTOSUP1           0.242      0.281      0.861      0.389
    PSYCTRL1           0.026      0.319      0.081      0.936
    SEX                0.048      0.327      0.147      0.883
    AGETEST1          -0.224      0.314     -0.715      0.475
    F16                0.042      0.212      0.198      0.843
    EDUCATIO           0.098      0.084      1.167      0.243
    SCHOOLTY           0.382      0.454      0.841      0.401
    SCHOOLTY          -0.032      0.542     -0.059      0.953

 C#4      ON
    ZJ1               -0.345      0.281     -1.229      0.219
    PRNTIVL1           0.354      0.284      1.246      0.213
    AUTOSUP1           0.416      0.277      1.499      0.134
    PSYCTRL1          -0.315      0.325     -0.969      0.333
    SEX               -0.147      0.302     -0.488      0.626
    AGETEST1          -0.157      0.296     -0.533      0.594
    F16               -0.208      0.192     -1.083      0.279
    EDUCATIO           0.043      0.081      0.529      0.597
    SCHOOLTY          -0.008      0.435     -0.019      0.985
    SCHOOLTY          -0.270      0.532     -0.508      0.611

 Intercepts
    C#2                1.861      6.978      0.267      0.790
    C#3                0.228      4.932      0.046      0.963
    C#4                3.279      4.787      0.685      0.493

Parameterization using Reference Class 2

 C#1      ON
    ZJ1                1.000      0.379      2.637      0.008
    PRNTIVL1          -0.115      0.426     -0.271      0.787
    AUTOSUP1           0.384      0.402      0.955      0.340
    PSYCTRL1          -0.110      0.467     -0.235      0.814
    SEX               -0.450      0.446     -1.009      0.313
    AGETEST1           0.115      0.433      0.265      0.791
    F16                0.075      0.271      0.275      0.783
    EDUCATIO          -0.096      0.126     -0.759      0.448
    SCHOOLTY           0.563      0.644      0.874      0.382
    SCHOOLTY           0.761      0.882      0.862      0.388

 C#3      ON
    ZJ1                0.614      0.254      2.416      0.016
    PRNTIVL1           0.279      0.291      0.957      0.339
    AUTOSUP1           0.626      0.257      2.434      0.015
    PSYCTRL1          -0.084      0.259     -0.324      0.746
    SEX               -0.402      0.345     -1.165      0.244
    AGETEST1          -0.110      0.309     -0.355      0.722
    F16                0.117      0.203      0.574      0.566
    EDUCATIO           0.003      0.085      0.032      0.975
    SCHOOLTY           0.944      0.447      2.111      0.035
    SCHOOLTY           0.729      0.622      1.171      0.242

 C#4      ON
    ZJ1                0.655      0.194      3.369      0.001
    PRNTIVL1           0.239      0.228      1.050      0.294
    AUTOSUP1           0.800      0.208      3.844      0.000
    PSYCTRL1          -0.425      0.215     -1.975      0.048
    SEX               -0.597      0.280     -2.133      0.033
    AGETEST1          -0.043      0.231     -0.185      0.854
    F16               -0.134      0.165     -0.811      0.417
    EDUCATIO          -0.053      0.071     -0.737      0.461
    SCHOOLTY           0.554      0.354      1.565      0.118
    SCHOOLTY           0.490      0.505      0.970      0.332

 Intercepts
    C#1               -1.861      6.978     -0.267      0.790
    C#3               -1.633      4.603     -0.355      0.723
    C#4                1.418      3.563      0.398      0.691

Parameterization using Reference Class 3

 C#1      ON
    ZJ1                0.386      0.292      1.324      0.186
    PRNTIVL1          -0.394      0.290     -1.360      0.174
    AUTOSUP1          -0.242      0.281     -0.861      0.389
    PSYCTRL1          -0.026      0.319     -0.081      0.936
    SEX               -0.048      0.327     -0.147      0.883
    AGETEST1           0.224      0.314      0.715      0.475
    F16               -0.042      0.212     -0.198      0.843
    EDUCATIO          -0.098      0.084     -1.167      0.243
    SCHOOLTY          -0.382      0.454     -0.841      0.401
    SCHOOLTY           0.032      0.542      0.059      0.953

 C#2      ON
    ZJ1               -0.614      0.254     -2.416      0.016
    PRNTIVL1          -0.279      0.291     -0.957      0.339
    AUTOSUP1          -0.626      0.257     -2.434      0.015
    PSYCTRL1           0.084      0.259      0.324      0.746
    SEX                0.402      0.345      1.165      0.244
    AGETEST1           0.110      0.309      0.355      0.722
    F16               -0.117      0.203     -0.574      0.566
    EDUCATIO          -0.003      0.085     -0.032      0.975
    SCHOOLTY          -0.944      0.447     -2.111      0.035
    SCHOOLTY          -0.729      0.622     -1.171      0.242

 C#4      ON
    ZJ1                0.041      0.143      0.286      0.775
    PRNTIVL1          -0.040      0.153     -0.259      0.795
    AUTOSUP1           0.174      0.139      1.253      0.210
    PSYCTRL1          -0.341      0.122     -2.798      0.005
    SEX               -0.195      0.194     -1.007      0.314
    AGETEST1           0.067      0.186      0.360      0.719
    F16               -0.250      0.127     -1.970      0.049
    EDUCATIO          -0.055      0.043     -1.284      0.199
    SCHOOLTY          -0.390      0.246     -1.585      0.113
    SCHOOLTY          -0.238      0.288     -0.828      0.408

 Intercepts
    C#1               -0.228      4.932     -0.046      0.963
    C#2                1.633      4.603      0.355      0.723
    C#4                3.051      2.616      1.166      0.243


TECHNICAL 1 OUTPUT


     PARAMETER SPECIFICATION FOR LATENT CLASS 1


           NU
              DPRS1         DPRS2         DPRS3         DPRS4
              ________      ________      ________      ________
 1                  0             0             0             0


           LAMBDA
              I             S
              ________      ________
 DPRS1              0             0
 DPRS2              0             0
 DPRS3              0             0
 DPRS4              0             0


           THETA
              DPRS1         DPRS2         DPRS3         DPRS4
              ________      ________      ________      ________
 DPRS1              1
 DPRS2              0             2
 DPRS3              0             0             3
 DPRS4              0             0             0             4


           ALPHA
              I             S
              ________      ________
 1                  5             6


           BETA
              I             S
              ________      ________
 I                  0             0
 S                  0             0


           PSI
              I             S
              ________      ________
 I                  7
 S                  0             8


     PARAMETER SPECIFICATION FOR LATENT CLASS 2


           NU
              DPRS1         DPRS2         DPRS3         DPRS4
              ________      ________      ________      ________
 1                  0             0             0             0


           LAMBDA
              I             S
              ________      ________
 DPRS1              0             0
 DPRS2              0             0
 DPRS3              0             0
 DPRS4              0             0


           THETA
              DPRS1         DPRS2         DPRS3         DPRS4
              ________      ________      ________      ________
 DPRS1              1
 DPRS2              0             2
 DPRS3              0             0             3
 DPRS4              0             0             0             4


           ALPHA
              I             S
              ________      ________
 1                  9            10


           BETA
              I             S
              ________      ________
 I                  0             0
 S                  0             0


           PSI
              I             S
              ________      ________
 I                  7
 S                  0             8


     PARAMETER SPECIFICATION FOR LATENT CLASS 3


           NU
              DPRS1         DPRS2         DPRS3         DPRS4
              ________      ________      ________      ________
 1                  0             0             0             0


           LAMBDA
              I             S
              ________      ________
 DPRS1              0             0
 DPRS2              0             0
 DPRS3              0             0
 DPRS4              0             0


           THETA
              DPRS1         DPRS2         DPRS3         DPRS4
              ________      ________      ________      ________
 DPRS1              1
 DPRS2              0             2
 DPRS3              0             0             3
 DPRS4              0             0             0             4


           ALPHA
              I             S
              ________      ________
 1                 11            12


           BETA
              I             S
              ________      ________
 I                  0             0
 S                  0             0


           PSI
              I             S
              ________      ________
 I                  7
 S                  0             8


     PARAMETER SPECIFICATION FOR LATENT CLASS 4


           NU
              DPRS1         DPRS2         DPRS3         DPRS4
              ________      ________      ________      ________
 1                  0             0             0             0


           LAMBDA
              I             S
              ________      ________
 DPRS1              0             0
 DPRS2              0             0
 DPRS3              0             0
 DPRS4              0             0


           THETA
              DPRS1         DPRS2         DPRS3         DPRS4
              ________      ________      ________      ________
 DPRS1              1
 DPRS2              0             2
 DPRS3              0             0             3
 DPRS4              0             0             0             4


           ALPHA
              I             S
              ________      ________
 1                 13            14


           BETA
              I             S
              ________      ________
 I                  0             0
 S                  0             0


           PSI
              I             S
              ________      ________
 I                  7
 S                  0             8


     PARAMETER SPECIFICATION FOR LATENT CLASS REGRESSION MODEL PART


           ALPHA(C)
              C#1           C#2           C#3           C#4
              ________      ________      ________      ________
 1                 15            16            17             0


     STARTING VALUES FOR LATENT CLASS 1


           NU
              DPRS1         DPRS2         DPRS3         DPRS4
              ________      ________      ________      ________
 1              0.000         0.000         0.000         0.000


           LAMBDA
              I             S
              ________      ________
 DPRS1          1.000         0.000
 DPRS2          1.000         1.000
 DPRS3          1.000         2.000
 DPRS4          1.000         3.000


           THETA
              DPRS1         DPRS2         DPRS3         DPRS4
              ________      ________      ________      ________
 DPRS1          0.041
 DPRS2          0.000         0.047
 DPRS3          0.000         0.000         0.047
 DPRS4          0.000         0.000         0.000         0.051


           ALPHA
              I             S
              ________      ________
 1              0.506         0.015


           BETA
              I             S
              ________      ________
 I              0.000         0.000
 S              0.000         0.000


           PSI
              I             S
              ________      ________
 I              0.079
 S              0.000         0.015


     STARTING VALUES FOR LATENT CLASS 2


           NU
              DPRS1         DPRS2         DPRS3         DPRS4
              ________      ________      ________      ________
 1              0.000         0.000         0.000         0.000


           LAMBDA
              I             S
              ________      ________
 DPRS1          1.000         0.000
 DPRS2          1.000         1.000
 DPRS3          1.000         2.000
 DPRS4          1.000         3.000


           THETA
              DPRS1         DPRS2         DPRS3         DPRS4
              ________      ________      ________      ________
 DPRS1          0.041
 DPRS2          0.000         0.047
 DPRS3          0.000         0.000         0.047
 DPRS4          0.000         0.000         0.000         0.051


           ALPHA
              I             S
              ________      ________
 1              0.506         0.015


           BETA
              I             S
              ________      ________
 I              0.000         0.000
 S              0.000         0.000


           PSI
              I             S
              ________      ________
 I              0.079
 S              0.000         0.015


     STARTING VALUES FOR LATENT CLASS 3


           NU
              DPRS1         DPRS2         DPRS3         DPRS4
              ________      ________      ________      ________
 1              0.000         0.000         0.000         0.000


           LAMBDA
              I             S
              ________      ________
 DPRS1          1.000         0.000
 DPRS2          1.000         1.000
 DPRS3          1.000         2.000
 DPRS4          1.000         3.000


           THETA
              DPRS1         DPRS2         DPRS3         DPRS4
              ________      ________      ________      ________
 DPRS1          0.041
 DPRS2          0.000         0.047
 DPRS3          0.000         0.000         0.047
 DPRS4          0.000         0.000         0.000         0.051


           ALPHA
              I             S
              ________      ________
 1              0.506         0.015


           BETA
              I             S
              ________      ________
 I              0.000         0.000
 S              0.000         0.000


           PSI
              I             S
              ________      ________
 I              0.079
 S              0.000         0.015


     STARTING VALUES FOR LATENT CLASS 4


           NU
              DPRS1         DPRS2         DPRS3         DPRS4
              ________      ________      ________      ________
 1              0.000         0.000         0.000         0.000


           LAMBDA
              I             S
              ________      ________
 DPRS1          1.000         0.000
 DPRS2          1.000         1.000
 DPRS3          1.000         2.000
 DPRS4          1.000         3.000


           THETA
              DPRS1         DPRS2         DPRS3         DPRS4
              ________      ________      ________      ________
 DPRS1          0.041
 DPRS2          0.000         0.047
 DPRS3          0.000         0.000         0.047
 DPRS4          0.000         0.000         0.000         0.051


           ALPHA
              I             S
              ________      ________
 1              0.506         0.015


           BETA
              I             S
              ________      ________
 I              0.000         0.000
 S              0.000         0.000


           PSI
              I             S
              ________      ________
 I              0.079
 S              0.000         0.015


     STARTING VALUES FOR LATENT CLASS REGRESSION MODEL PART


           ALPHA(C)
              C#1           C#2           C#3           C#4
              ________      ________      ________      ________
 1              0.000         0.000         0.000         0.000


TECHNICAL 11 OUTPUT

     Random Starts Specifications for the k-1 Class Analysis Model
        Number of initial stage random starts                5000
        Number of final stage optimizations                   100


     VUONG-LO-MENDELL-RUBIN LIKELIHOOD RATIO TEST FOR 3 (H0) VERSUS 4 CLASSES

          H0 Loglikelihood Value                          240.942
          2 Times the Loglikelihood Difference             68.777
          Difference in the Number of Parameters                3
          Mean                                              4.840
          Standard Deviation                               13.603
          P-Value                                          0.0009

     LO-MENDELL-RUBIN ADJUSTED LRT TEST

          Value                                            65.977
          P-Value                                          0.0012


TECHNICAL 14 OUTPUT

     Random Starts Specifications for the k-1 Class Analysis Model
        Number of initial stage random starts                5000
        Number of final stage optimizations                   100

     Random Starts Specification for the k-1 Class Model for Generated Data
        Number of initial stage random starts                   0
        Number of final stage optimizations for the
           initial stage random starts                          0
     Random Starts Specification for the k Class Model for Generated Data
        Number of initial stage random starts                  40
        Number of final stage optimizations                     8
     Number of bootstrap draws requested                   Varies


     PARAMETRIC BOOTSTRAPPED LIKELIHOOD RATIO TEST FOR 3 (H0) VERSUS 4 CLASSES

          H0 Loglikelihood Value                          240.942
          2 Times the Loglikelihood Difference             68.777
          Difference in the Number of Parameters                3
          Approximate P-Value                              0.0000
          Successful Bootstrap Draws                           10

     WARNING:  THE BEST LOGLIKELIHOOD VALUE FOR THE 4 CLASS MODEL FOR THE GENERATED DATA
     WAS NOT REPLICATED IN 7 OUT OF 10 BOOTSTRAP DRAWS.  THE P-VALUE MAY NOT BE TRUSTWORTHY
     DUE TO LOCAL MAXIMA.  INCREASE THE NUMBER OF RANDOM STARTS USING THE LRTSTARTS OPTION.


SAMPLE STATISTICS FOR ESTIMATED FACTOR SCORES


     SAMPLE STATISTICS


           Means
              I             S             C_I           C_S
              ________      ________      ________      ________
 1              0.502         0.010         0.499         0.010


           Covariances
              I             S             C_I           C_S
              ________      ________      ________      ________
 I              0.051
 S             -0.002         0.003
 C_I            0.052        -0.002         0.054
 C_S           -0.002         0.003        -0.003         0.004


           Correlations
              I             S             C_I           C_S
              ________      ________      ________      ________
 I              1.000
 S             -0.157         1.000
 C_I            0.988        -0.176         1.000
 C_S           -0.142         0.934        -0.206         1.000


PLOT INFORMATION

The following plots are available:

  Histograms of sample values
  Histograms of estimated values
  Scatterplots (sample values, estimated factor scores, estimated values)
  Sample means
  Estimated means
  Sample and estimated means
  Latent variable distribution plots
  Observed individual values
  Estimated individual values
  Estimated means and observed individual values
  Estimated means and estimated individual values
  Mixture distributions

DIAGRAM INFORMATION

  Mplus diagrams are currently not available for Mixture analysis.
  No diagram output was produced.


     Beginning Time:  16:59:06
        Ending Time:  17:03:21
       Elapsed Time:  00:04:15


MUTHEN & MUTHEN
3463 Stoner Ave.
Los Angeles, CA  90066

Tel: (310) 391-9971
Fax: (310) 391-8971
Web: www.StatModel.com
Support: Support@StatModel.com

Copyright (c) 1998-2013 Muthen & Muthen
