# Supplementary material for: The Impact of Academic Achievement and Parental Practices on Depressive Symptom Trajectories Among Chinese Adolescents
Source: Res Child Adolesc Psychopathol. 2021 May 13;49(10):1359–71. doi: 10.1007/s10802-021-00826-9 (PMC8380233; doi:10.1007/s10802-021-00826-9)
Supplement: Supplementary file 3 — Supplementary file3 (OUT 405 KB) [file 10802_2021_826_MOESM3_ESM.csv]

IDALL	SEX	agetest1	F12	F13	F16	zj1	PRNTIVL1	AUTOSUP1	PSYCTRL1	DPRS1	DPRS2	DPRS3	DPRS4	FatherEdu	MotherEdu	Education	schoolTy1	schoolTy2
1012740	0	12.7392197125257	3	3	3	99	3.18181818181818	4.875	1.11111111111111	.259259259259259	.296296296296296	.148148148148148	.333333333333333	9	9	9	1	0
1013730	1	13.5496235455168	3	5	3	99	3.72727272727273	4.75	1.27777777777778	.555555555555556	.481481481481481	.62962962962963	.814814814814815	9	12	12	1	0
1016290	1	12.9664613278576	3	3	3	99	4.45454545454545	4.75	3	.222222222222222	.037037037037037	.259259259259259	.185185185185185	9	9	9	1	0
1012870	1	12.3641341546886	3	3	3	99	3.72727272727273	4.75	1.88888888888889	0	.222222222222222	.222222222222222	.037037037037037	9	9	9	1	0
1014850	1	12.6379192334018	4	1	3	99	3.72727272727273	4.25	3.33333333333333	.925925925925926	.407407407407407	.62962962962963	.37037037037037	12	0	12	1	0
1015220	1	12.9418206707734	3	3	4	99	3.18181818181818	4	2.5	.481481481481481	.481481481481481	.333333333333333	.222222222222222	9	9	9	1	0
1014060	1	13.0184804928131	3	3	4	99	3.09090909090909	3.875	3.61111111111111	.37037037037037	.518518518518518	.407407407407407	.555555555555556	9	9	9	1	0
1015190	0	12.3394934976044	3	3	3	99	4.54545454545455	3.75	3.05555555555556	.259259259259259	.259259259259259	.222222222222222	.185185185185185	9	9	9	1	0
1017140	1	12.9390828199863	3	3	4	99	3	3.75	3.11111111111111	.481481481481481	.814814814814815	.814814814814815	.666666666666667	9	9	9	1	0
1016630	1	12.517453798768	3	2	4	99	2.72727272727273	3.75	3	.333333333333333	.444444444444444	.185185185185185	.222222222222222	9	6	9	1	0
1017110	1	12.041067761807	3	6	5	99	3.54545454545455	3.75	2.55555555555556	1	.777777777777778	.555555555555556	.444444444444444	9	15	15	1	0
1014730	0	12.5639972621492	3	3	4	99	2.18181818181818	3.625	2.94444444444444	.296296296296296	.259259259259259	.296296296296296	.518518518518518	9	9	9	1	0
1016310	1	12.1806981519507	3	3	3	99	3	3.625	2.33333333333333	.148148148148148	.037037037037037	.851851851851852	99	9	9	9	1	0
1013670	1	13.0349075975359	3	3	3	99	3.09090909090909	3.5	2.66666666666667	.148148148148148	.111111111111111	.111111111111111	.259259259259259	9	9	9	1	0
1013290	1	12.7091033538672	3	3	3	99	3	3.375	3.77777777777778	.62962962962963	.407407407407407	.518518518518518	.407407407407407	9	9	9	1	0
1017080	1	13.3744010951403	2	3	3	99	3	3.375	2.55555555555556	.259259259259259	.37037037037037	.111111111111111	.185185185185185	6	9	9	1	0
1012550	0	14.5626283367556	3	3	3	99	4	3.25	2.66666666666667	.296296296296296	.222222222222222	.037037037037037	.384615384615385	9	9	9	1	0
1016470	0	12.6954140999316	3	3	3	99	2.27272727272727	3.25	2.88888888888889	.666666666666667	.703703703703704	.222222222222222	.37037037037037	9	9	9	1	0
1017290	0	12.6078028747433	3	3	4	99	2.27272727272727	3.25	2.44444444444444	.222222222222222	.222222222222222	.111111111111111	.148148148148148	9	9	9	1	0
1004120	1	12.8569472963723	2	2	3	99	2.45454545454545	3.25	1.33333333333333	.185185185185185	.222222222222222	.148148148148148	.0740740740740741	6	6	6	1	0
1003620	1	12.9691991786448	4	3	3	99	4.45454545454545	3.25	2.94444444444444	.62962962962963	.62962962962963	.555555555555556	.407407407407407	12	9	12	1	0
1016190	0	13.1143052703628	5	3	3	99	3.81818181818182	3.125	2.05555555555556	.555555555555556	.814814814814815	.851851851851852	.962962962962963	12	9	12	1	0
1017310	1	12.3093771389459	2	3	4	99	3.54545454545455	3	2.27777777777778	.555555555555556	.407407407407407	.62962962962963	.37037037037037	6	9	9	1	0
1016240	1	12.3832991101985	3	3	4	99	3.63636363636364	2.875	2.27777777777778	.444444444444444	.296296296296296	1.03703703703704	1.25925925925926	9	9	9	1	0
1016820	0	13.5660506502396	3	2	4	99	2.54545454545455	2.625	2.83333333333333	1.18518518518519	.777777777777778	1.07407407407407	99	9	6	9	1	0
1015270	0	12.7912388774812	2	3	2	99	3.7	2.625	3.22222222222222	.296296296296296	.111111111111111	.185185185185185	.111111111111111	6	9	9	1	0
1014340	1	13.4127310061602	3	2	4	99	2.27272727272727	2.625	4	.925925925925926	.814814814814815	.888888888888889	.62962962962963	9	6	9	1	0
1016320	1	13.0047912388775	3	5	4	99	2.18181818181818	2.625	4.61111111111111	.555555555555556	.518518518518518	.37037037037037	.296296296296296	9	12	12	1	0
1017070	0	13.3716632443532	2	1	3	99	2.18181818181818	2.5	2.64705882352941	.703703703703704	.666666666666667	1.14814814814815	1	6	0	6	1	0
1016830	0	12.5667351129363	3	2	3	99	2.18181818181818	2.375	2.22222222222222	1	.703703703703704	.444444444444444	.481481481481481	9	6	9	1	0
1015760	0	12.5010266940452	5	3	3	99	4	2.375	2.22222222222222	.740740740740741	.444444444444444	.666666666666667	.481481481481481	12	9	12	1	0
1016260	0	12.7200547570157	3	3	3	99	3.18181818181818	2.125	3.11111111111111	.444444444444444	1	.962962962962963	1.14814814814815	9	9	9	1	0
1014410	0	99	3	3	3	-2.72429257237701	1.36363636363636	1.25	2.66666666666667	.538461538461538	.481481481481481	.576923076923077	.444444444444444	9	9	9	1	0
1003050	0	13.3415468856947	2	3	3	-2.62111759636027	3.2	2.8	3.16666666666667	.740740740740741	.666666666666667	.884615384615385	.888888888888889	6	9	9	1	0
1002970	0	13.7138945927447	3	3	3	-2.59497165075917	3.22222222222222	3	3	.814814814814815	.555555555555556	.518518518518518	99	9	9	9	1	0
1016330	0	13.0130047912389	3	2	3	-2.53004232138553	3.27272727272727	3.375	3	.185185185185185	.222222222222222	.0740740740740741	.185185185185185	9	6	9	1	0
1013480	0	12.6789869952088	2	2	5	-2.4684726141172	2.27272727272727	2.125	2.27777777777778	.962962962962963	.958333333333333	1.08	1.04	6	6	6	1	0
1015380	1	13.6344969199179	3	3	3	-2.46437248178817	4.81818181818182	4.375	4.16666666666667	.888888888888889	.884615384615385	1.11111111111111	.961538461538462	9	9	9	1	0
1013160	0	13.8836413415469	3	3	5	-2.44226129153571	3	4	2.88888888888889	.346153846153846	.555555555555556	.692307692307692	.592592592592593	9	9	9	1	0
1004130	0	12.9144421629021	3	3	3	-2.40133975846373	1.72727272727273	2.5	2.55555555555556	.333333333333333	.37037037037037	.518518518518518	99	9	9	9	1	0
1003220	0	13.3278576317591	2	3	3	-2.36616021733283	1.81818181818182	2.125	1.875	.518518518518518	.666666666666667	.740740740740741	.8	6	9	9	1	0
1016840	0	12.7118412046543	3	3	3	-2.31250896634596	2.90909090909091	3.25	2.88888888888889	.592592592592593	.666666666666667	.62962962962963	.481481481481481	9	9	9	1	0
1016360	0	14.0643394934976	2	2	5	-2.29641545648354	3.36363636363636	3.125	3.66666666666667	.444444444444444	99	.851851851851852	.666666666666667	6	6	6	1	0
1002950	0	12.4572210814511	4	4	2	-2.23281254773413	3.18181818181818	2.75	3.27777777777778	.625	.888888888888889	.769230769230769	.555555555555556	12	12	12	1	0
1016340	0	12.1806981519507	3	2	4	-2.22857487294585	2.45454545454545	3.375	2.72222222222222	.592592592592593	.851851851851852	.592592592592593	.961538461538462	9	6	9	1	0
1013200	1	12.7091033538672	2	2	5	-2.22518575097551	4.9	4.5	4.33333333333333	.222222222222222	0	.148148148148148	.148148148148148	6	6	6	1	0
1002740	0	12.4818617385352	3	5	3	-2.19094044712315	2.90909090909091	4	2.11111111111111	.925925925925926	.888888888888889	99	99	9	12	12	1	0
1014900	1	14.9623545516769	2	2	4	-2.14599945253496	3.63636363636364	3.28571428571429	2.94444444444444	.518518518518518	.703703703703704	.740740740740741	.777777777777778	6	6	6	1	0
1001250	0	99	3	3	3	-2.12373761234128	3.18181818181818	2.25	3.11111111111111	.37037037037037	.888888888888889	.925925925925926	1.25925925925926	9	9	9	1	0
1013000	0	13.968514715948	2	3	3	-2.12257976630638	2.27272727272727	3.625	3.5	.407407407407407	99	99	99	6	9	9	1	0
1015370	0	13.9055441478439	3	3	99	-2.10061105721632	1.90909090909091	2.625	2.38888888888889	.814814814814815	.37037037037037	.185185185185185	.740740740740741	9	9	9	1	0
1014430	0	12.6872005475702	3	3	1	-2.04074759334236	4.45454545454545	4.625	3.27777777777778	.444444444444444	.444444444444444	.333333333333333	.555555555555556	9	9	9	1	0
1001260	0	13.07871321013	2	3	3	-2.03081178859281	2.72727272727273	4.25	4.22222222222222	.259259259259259	.592592592592593	.777777777777778	.962962962962963	6	9	9	1	0
1002720	0	13.2183436002738	3	3	4	-2.00013947083592	1.72727272727273	4.875	3.44444444444444	.555555555555556	.740740740740741	.592592592592593	99	9	9	9	1	0
1014880	0	12.0574948665298	2	2	5	-1.96847667437722	3.09090909090909	1.625	3.61111111111111	1.03703703703704	.925925925925926	99	99	6	6	6	1	0
1000330	0	13.6262833675565	2	2	4	-1.95932449751045	3.18181818181818	3.625	3.27777777777778	.703703703703704	.666666666666667	99	.37037037037037	6	6	6	1	0
1004170	1	13.8836413415469	3	2	3	-1.94998398788385	4	3.875	3.77777777777778	.62962962962963	.851851851851852	1.11111111111111	.740740740740741	9	6	9	1	0
1016370	0	12.5722108145106	3	3	4	-1.94490735683913	3.8	4.5	2.44444444444444	.740740740740741	.481481481481481	.259259259259259	.37037037037037	9	9	9	1	0
1003340	0	13.4784394250513	3	3	3	-1.85440183097417	2.45454545454545	3.875	4.27777777777778	.259259259259259	.185185185185185	.185185185185185	.407407407407407	9	9	9	1	0
1016350	0	12.8021902806297	3	3	3	-1.84901390939333	1.45454545454545	2	3.38888888888889	.444444444444444	.814814814814815	.814814814814815	99	9	9	9	1	0
1003030	0	12.7857631759069	5	3	3	-1.83993303187281	2	2.5	3.33333333333333	.407407407407407	.666666666666667	.423076923076923	.148148148148148	12	9	12	1	0
1002000	0	13.741273100616	3	3	2	-1.82297759678488	2.45454545454545	2.875	3	.62962962962963	99	99	99	9	9	9	1	0
1014420	0	13.6043805612594	1	1	3	-1.81990570696257	3.36363636363636	4	3.22222222222222	.37037037037037	.444444444444444	.814814814814815	.740740740740741	0	0	0	1	0
1000730	0	12.3696098562628	3	6	2	-1.81841737160398	2.72727272727273	4	3.22222222222222	.703703703703704	.777777777777778	.703703703703704	.851851851851852	9	15	15	1	0
1000740	0	13.7960301163587	3	3	4	-1.7877968482352	3.27272727272727	4.25	2.72222222222222	.222222222222222	.259259259259259	.296296296296296	.259259259259259	9	9	9	1	0
1000750	0	12.37234770705	2	5	3	-1.78309177297471	3.45454545454545	3.75	2.88888888888889	.703703703703704	.333333333333333	.555555555555556	.481481481481481	6	12	12	1	0
1016380	0	14.1492128678987	2	2	3	-1.76394387821714	3.90909090909091	3.875	3.61111111111111	.333333333333333	.62962962962963	.518518518518518	.518518518518518	6	6	6	1	0
1003210	0	12.5420944558522	2	5	3	-1.72850459000921	3.18181818181818	2.75	2.64705882352941	.481481481481481	.346153846153846	.56	.185185185185185	6	12	12	1	0
1014400	0	12.4791238877481	3	3	3	-1.70625900817696	4.18181818181818	4.375	3.83333333333333	.296296296296296	.37037037037037	.423076923076923	99	9	9	9	1	0
1016400	1	13.2265571526352	3	3	4	-1.69775836048465	2.54545454545455	3.375	3.27777777777778	.407407407407407	.666666666666667	.62962962962963	99	9	9	9	1	0
1001960	0	12.4517453798768	3	3	3	-1.68448873074287	2.81818181818182	2	2.05555555555556	.666666666666667	.444444444444444	.407407407407407	99	9	9	9	1	0
1016390	0	12.4052019164956	3	3	3	-1.67290348619835	3.45454545454545	4	3.66666666666667	.259259259259259	.296296296296296	.444444444444444	.444444444444444	9	9	9	1	0
1003360	0	99	3	1	2	-1.65751889535152	2.81818181818182	2	2.72222222222222	.555555555555556	.851851851851852	.851851851851852	.925925925925926	9	0	9	1	0
1016860	1	13.1964407939767	3	3	5	-1.62230080249133	3	2.5	2.33333333333333	.296296296296296	.703703703703704	.518518518518518	.703703703703704	9	9	9	1	0
1013690	1	12.7173169062286	3	3	2	-1.61684200883687	3.72727272727273	4.125	2.83333333333333	.666666666666667	.407407407407407	.259259259259259	.37037037037037	9	9	9	1	0
1012540	0	13.6919917864476	3	3	2	-1.61211665568615	3.09090909090909	2.875	3.22222222222222	.555555555555556	.481481481481481	.666666666666667	.740740740740741	9	9	9	1	0
1001780	0	99	3	4	3	-1.61034366078056	3.36363636363636	2.28571428571429	1.94117647058824	.703703703703704	.407407407407407	.888888888888889	.16	9	12	12	1	0
1013520	0	12.7994524298426	2	5	2	-1.58581584600832	3.45454545454545	3.625	2.72222222222222	.407407407407407	.259259259259259	.851851851851852	99	6	12	12	1	0
1003430	0	13.3990417522245	3	3	3	-1.5628282930779	4	3.125	3.05555555555556	.407407407407407	.407407407407407	.222222222222222	99	9	9	9	1	0
1002440	0	14.0698151950719	3	5	3	-1.55230972522383	3	2.42857142857143	2.33333333333333	.444444444444444	99	99	99	9	12	12	1	0
1014100	0	14.2888432580424	5	3	3	-1.5419686671657	3.63636363636364	3	2.83333333333333	.296296296296296	.703703703703704	.37037037037037	.259259259259259	12	9	12	1	0
1016850	1	13.4839151266256	3	1	5	-1.53318138837883	3.72727272727273	3.625	3.27777777777778	.407407407407407	.888888888888889	1.03703703703704	.888888888888889	9	0	9	1	0
1013610	0	99	3	5	4	-1.52135836133102	4	4.5	3	.555555555555556	.851851851851852	99	99	9	12	12	1	0
1004400	0	12.8049281314168	2	2	3	-1.51692595915263	2.90909090909091	2.25	2.77777777777778	.925925925925926	.851851851851852	.814814814814815	1.14814814814815	6	6	6	1	0
1013100	0	13.5195071868583	3	3	3	-1.50448911464781	3.09090909090909	3	2.76470588235294	.555555555555556	.703703703703704	.407407407407407	.62962962962963	9	9	9	1	0
1003230	0	14.1902806297057	3	3	3	-1.48288152506923	3.45454545454545	3.25	2.77777777777778	.6	.444444444444444	.481481481481481	.481481481481481	9	9	9	1	0
1001740	1	12.3175906913073	3	4	3	-1.47938145942337	3.45454545454545	2.375	4.72222222222222	.925925925925926	1	.925925925925926	.777777777777778	9	12	12	1	0
1015840	1	12.1971252566735	3	3	4	-1.47221740105785	1.81818181818182	2	2.61111111111111	.814814814814815	.444444444444444	1.25925925925926	.666666666666667	9	9	9	1	0
1001320	1	13.1909650924025	5	3	2	-1.46480512844592	3.18181818181818	3.5	3.44444444444444	.703703703703704	.740740740740741	1.44444444444444	1.14814814814815	12	9	12	1	0
1014380	1	15.2224503764545	3	3	3	-1.46120615538671	3.81818181818182	4.5	2.55555555555556	.296296296296296	.333333333333333	.333333333333333	.888888888888889	9	9	9	1	0
1015410	0	12.8186173853525	5	3	2	-1.45754830885149	3.36363636363636	2	4.16666666666667	.185185185185185	.148148148148148	.185185185185185	.037037037037037	12	9	12	1	0
1014920	0	12.7529089664613	3	4	3	-1.45476424175466	3.45454545454545	3.625	2.5	.518518518518518	.777777777777778	.62962962962963	.666666666666667	9	12	12	1	0
1002040	1	12.3449691991786	3	3	3	-1.45274698561179	3	3.5	3.66666666666667	.37037037037037	.37037037037037	.333333333333333	.296296296296296	9	9	9	1	0
1014910	0	99	3	3	3	-1.45241836258094	3	3.25	3.44444444444444	1.03846153846154	1.11111111111111	.851851851851852	.888888888888889	9	9	9	1	0
1012780	0	99	3	3	2	-1.44609344251591	3	2.625	2.66666666666667	.481481481481481	.333333333333333	.423076923076923	.444444444444444	9	9	9	1	0
1016430	0	12.6817248459959	3	3	4	-1.43014789172913	3	2.875	2.55555555555556	.518518518518518	.888888888888889	.703703703703704	.962962962962963	9	9	9	1	0
1000800	0	13.2046543463381	5	3	3	-1.41470098867063	4	5	2.55555555555556	.222222222222222	.0740740740740741	99	.444444444444444	12	9	12	1	0
1013900	0	12.9472963723477	5	4	3	-1.41379594726115	2.27272727272727	2.75	3.05555555555556	.666666666666667	.592592592592593	.666666666666667	.851851851851852	12	12	12	1	0
1014140	0	13.3442847364819	3	3	4	-1.39536678602221	2.09090909090909	3.125	3.22222222222222	.814814814814815	.703703703703704	.576923076923077	.5	9	9	9	1	0
1014450	1	12.0164271047228	3	2	4	-1.38025288614914	3.81818181818182	3.625	4.16666666666667	.740740740740741	.888888888888889	.703703703703704	.444444444444444	9	6	9	1	0
1013170	0	12.8021902806297	2	5	4	-1.35059718084141	3.54545454545455	3.125	3.94444444444444	.814814814814815	1	.851851851851852	.296296296296296	6	12	12	1	0
1013880	1	13.7084188911704	2	2	4	-1.34862731613036	2.63636363636364	3.5	2.05555555555556	.5	.555555555555556	.851851851851852	.925925925925926	6	6	6	1	0
1002050	1	15.2306639288159	2	2	4	-1.34477717109052	2.45454545454545	2.875	3.38888888888889	.962962962962963	.851851851851852	99	99	6	6	6	1	0
1002250	0	12.5776865160849	3	3	3	-1.3414235678677	2.90909090909091	3.75	3.33333333333333	.777777777777778	.518518518518518	.592592592592593	.555555555555556	9	9	9	1	0
1004310	0	13.0485968514716	3	1	3	-1.33630934321311	2.72727272727273	3.625	2.61111111111111	.407407407407407	.259259259259259	.407407407407407	.518518518518518	9	0	9	1	0
1003000	0	13.5441478439425	3	3	3	-1.33591226592346	4.1	4.25	4.27777777777778	.148148148148148	.037037037037037	.111111111111111	.592592592592593	9	9	9	1	0
1014190	0	12.580424366872	3	3	5	-1.30530009929515	1.09090909090909	1.75	2.22222222222222	.923076923076923	1.11111111111111	.666666666666667	.666666666666667	9	9	9	1	0
1015860	0	13.7385352498289	2	2	3	-1.30114397692816	4.36363636363636	3.875	3.5	.259259259259259	.296296296296296	.333333333333333	.703703703703704	6	6	6	1	0
1013420	0	13.1581108829569	3	3	3	-1.29742693821722	4.09090909090909	3.875	2.94444444444444	.185185185185185	.62962962962963	.222222222222222	99	9	9	9	1	0
1004390	1	12.4599589322382	3	3	2	-1.29560365817545	2.81818181818182	2.125	2.38888888888889	.333333333333333	.37037037037037	.444444444444444	.37037037037037	9	9	9	1	0
1003410	0	12.5147159479808	2	2	4	-1.28396449917414	3.54545454545455	2.375	2.77777777777778	.259259259259259	.148148148148148	.296296296296296	0	6	6	6	1	0
1000760	0	12.3230663928816	3	2	3	-1.28233056662811	3.72727272727273	3.125	2.33333333333333	.0740740740740741	.148148148148148	.222222222222222	.111111111111111	9	6	9	1	0
1000350	1	13.1471594798084	3	3	3	-1.2584311196235	2.90909090909091	2.25	2.77777777777778	.407407407407407	.62962962962963	.481481481481481	.481481481481481	9	9	9	1	0
1000790	0	13.015742642026	3	3	3	-1.25108793997713	2.27272727272727	3.5	3	.851851851851852	.407407407407407	.481481481481481	.555555555555556	9	9	9	1	0
1004280	1	12.8158795345654	2	2	3	-1.23402519920975	3.54545454545455	3.5	2.94444444444444	.259259259259259	.37037037037037	.37037037037037	.592592592592593	6	6	6	1	0
1002080	0	14.9349760438056	2	5	2	-1.23040053865686	2.81818181818182	2.75	2.72222222222222	.37037037037037	.518518518518518	.703703703703704	.592592592592593	6	12	12	1	0
1002940	0	12.3805612594114	3	2	2	-1.23001339137533	3.72727272727273	4	2.5	.481481481481481	.148148148148148	.153846153846154	.192307692307692	9	6	9	1	0
1001790	0	13.5441478439425	3	3	3	-1.22629203399051	3.55555555555556	3.57142857142857	3.55555555555556	1.11111111111111	.962962962962963	1.55555555555556	99	9	9	9	1	0
1003500	1	13.2265571526352	3	5	3	-1.2228398568008	2.72727272727273	4.25	1.61111111111111	1.03846153846154	1.03703703703704	1.11111111111111	99	9	12	12	1	0
1015020	0	12.0383299110198	3	3	3	-1.21033643998776	3.90909090909091	3.375	2.72222222222222	.555555555555556	.333333333333333	.666666666666667	.62962962962963	9	9	9	1	0
1004670	0	15.1813826146475	2	3	3	-1.19237600955846	4.27272727272727	2.5	2.55555555555556	.307692307692308	99	99	99	6	9	9	1	0
1003020	1	13.5578370978782	5	3	3	-1.18340658245806	3.27272727272727	3.875	3.16666666666667	.111111111111111	.555555555555556	99	99	12	9	12	1	0
1014020	1	12.7392197125257	3	3	3	-1.17763120208835	3.63636363636364	2.5	2.76470588235294	.481481481481481	.592592592592593	.851851851851852	99	9	9	9	1	0
1004210	1	13.0321697467488	3	3	3	-1.17133775378709	2.81818181818182	3.375	3.55555555555556	.423076923076923	99	.481481481481481	.407407407407407	9	9	9	1	0
1002930	1	12.8405201916496	2	3	3	-1.1708147777504	2.18181818181818	2	1	.962962962962963	1.18518518518519	1.25925925925926	1.2962962962963	6	9	9	1	0
1015040	1	12.4325804243669	2	3	5	-1.1702545362417	3.18181818181818	2.875	2.55555555555556	.666666666666667	.407407407407407	99	99	6	9	9	1	0
1015890	0	13.3305954825462	4	5	3	-1.15686083085827	4.09090909090909	4.25	3.72222222222222	.555555555555556	.407407407407407	.740740740740741	.407407407407407	12	12	12	1	0
1014980	0	12.3039014373717	2	99	5	-1.13654345238919	1.45454545454545	2.75	2.05555555555556	.703703703703704	.666666666666667	.666666666666667	.481481481481481	6	99	99	1	0
1003280	1	12.7392197125257	3	3	3	-1.13231903288419	4.09090909090909	3.5	2.88888888888889	.222222222222222	.037037037037037	.0740740740740741	.222222222222222	9	9	9	1	0
1012910	1	13.160848733744	2	3	2	-1.12799239353353	2.63636363636364	3.875	2.5	.444444444444444	.555555555555556	.703703703703704	.814814814814815	6	9	9	1	0
1001950	1	11.2142368240931	3	3	3	-1.12261602454651	4.18181818181818	3.625	1.11111111111111	1.22222222222222	.925925925925926	1	.740740740740741	9	9	9	1	0
1003460	0	13.0924024640657	3	3	3	-1.12018806488355	1.09090909090909	2	1.05555555555556	.592592592592593	.666666666666667	.703703703703704	.851851851851852	9	9	9	1	0
1003190	0	12.5092402464066	5	5	3	-1.11821433987565	3.63636363636364	3	3.77777777777778	.296296296296296	.62962962962963	.407407407407407	.962962962962963	12	12	12	1	0
1002540	1	12.3832991101985	3	3	3	-1.11676286405901	3.72727272727273	4	3.83333333333333	.444444444444444	.518518518518518	.518518518518518	.777777777777778	9	9	9	1	0
1013790	1	12.4407939767283	3	3	2	-1.11675372072875	3.45454545454545	3.75	2.77777777777778	.518518518518518	.592592592592593	.481481481481481	.703703703703704	9	9	9	1	0
1000240	0	13.3826146475017	2	2	4	-1.11631163542706	3.54545454545455	3.25	2.77777777777778	.888888888888889	.444444444444444	.518518518518518	.192307692307692	6	6	6	1	0
1004620	0	13.0513347022587	3	2	4	-1.11082787542176	3.09090909090909	3	2	.407407407407407	.444444444444444	.111111111111111	.37037037037037	9	6	9	1	0
1014480	1	13.2621492128679	2	3	4	-1.10446009517846	1.72727272727273	3.5	2.5	.740740740740741	.740740740740741	.555555555555556	.851851851851852	6	9	9	1	0
1016910	1	13.7631759069131	2	3	5	-1.09744767950963	4.63636363636364	3.875	2.77777777777778	1.2962962962963	1.03703703703704	.777777777777778	.62962962962963	6	9	9	1	0
1001300	0	13.1006160164271	3	6	3	-1.09492989898724	4.27272727272727	4.5	3.22222222222222	.185185185185185	.0740740740740741	.037037037037037	.037037037037037	9	15	15	1	0
1002260	0	12.3668720054757	3	3	5	-1.08758647654325	3.27272727272727	3.5	2.61111111111111	1	99	.592592592592593	.925925925925926	9	9	9	1	0
1013860	1	13.2183436002738	5	3	2	-1.08153202037583	2.90909090909091	3.125	1.94444444444444	.518518518518518	.481481481481481	.37037037037037	.407407407407407	12	9	12	1	0
1000360	0	12.807665982204	3	3	3	-1.07441134795634	4.36363636363636	5	2.38888888888889	.296296296296296	.555555555555556	.333333333333333	.592592592592593	9	9	9	1	0
1014440	1	12.5256673511294	5	3	4	-1.05491943005085	1.27272727272727	4.5	1.27777777777778	.444444444444444	.111111111111111	.037037037037037	.037037037037037	12	9	12	1	0
1003420	0	14.009582477755	3	3	2	-1.04881483166771	4.09090909090909	3.25	4.33333333333333	.037037037037037	1.11111111111111	.925925925925926	.925925925925926	9	9	9	1	0
1016420	1	13.3278576317591	3	3	4	-1.04840398146852	2.7	4	2.16666666666667	.48	.461538461538462	.407407407407407	.740740740740741	9	9	9	1	0
1013920	0	13.2156057494867	6	3	3	-1.03942130656692	2.81818181818182	3.125	2.94444444444444	.777777777777778	.740740740740741	.814814814814815	1.33333333333333	15	9	15	1	0
1004500	0	12.5612594113621	3	3	3	-1.0346336354418	2.09090909090909	2.75	2.83333333333333	.62962962962963	.888888888888889	.518518518518518	.740740740740741	9	9	9	1	0
1004420	0	13.1991786447639	5	3	2	-1.03376037075906	4.72727272727273	4.875	3.05555555555556	.222222222222222	.296296296296296	.259259259259259	.148148148148148	12	9	12	1	0
1012660	0	13.3388090349076	3	3	5	-1.02683445102957	3.18181818181818	3.375	2.83333333333333	.444444444444444	.481481481481481	.703703703703704	.592592592592593	9	9	9	1	0
1001570	0	13.0841889117043	3	3	3	-1.02089521411783	3.81818181818182	4	3.83333333333333	.185185185185185	1.03703703703704	.666666666666667	.555555555555556	9	9	9	1	0
1013660	1	13.1854893908282	3	3	4	-1.01328620264117	1.63636363636364	2	2.16666666666667	.666666666666667	.777777777777778	.740740740740741	.851851851851852	9	9	9	1	0
1001600	0	12.7227926078029	5	3	3	-1.01328289409113	2.90909090909091	3.375	3.22222222222222	.185185185185185	.962962962962963	.925925925925926	.62962962962963	12	9	12	1	0
1000130	1	15.1649555099247	2	2	3	-1.00245155065928	2.63636363636364	4.125	4.5	.222222222222222	.518518518518518	.444444444444444	99	6	6	6	1	0
1000590	1	13.7357973990418	3	5	3	-1.00237364673225	3.45454545454545	3	2.33333333333333	.333333333333333	.333333333333333	.259259259259259	.444444444444444	9	12	12	1	0
1003470	0	12.8542094455852	1	1	5	-.991310943753064	3.09090909090909	2	2.55555555555556	.407407407407407	1	1	99	0	0	0	1	0
1001350	1	12.7474332648871	3	3	3	-.988811518515721	2	2.625	2.22222222222222	.592592592592593	.740740740740741	.666666666666667	.851851851851852	9	9	9	1	0
1004710	0	12.8651608487337	2	3	3	-.978740275205676	3.18181818181818	5	2.33333333333333	.703703703703704	99	99	99	6	9	9	1	0
1000120	0	14.5051334702259	2	3	4	-.977629152212908	1.81818181818182	2	3.11111111111111	1.11111111111111	.703703703703704	1.11111111111111	.777777777777778	6	9	9	1	0
1002550	1	13.0102669404517	5	5	1	-.965948924411841	3.18181818181818	3.875	2.05555555555556	.222222222222222	.555555555555556	.666666666666667	.481481481481481	12	12	12	1	0
1012880	1	12.7364818617385	3	3	4	-.955914182998119	3.27272727272727	4.375	4.55555555555556	.62962962962963	.37037037037037	.777777777777778	.62962962962963	9	9	9	1	0
1002240	0	13.3798767967146	4	4	3	-.955763205817136	1.45454545454545	2.5	2.33333333333333	.296296296296296	.222222222222222	.37037037037037	99	12	12	12	1	0
1001760	0	12.6735112936345	4	3	3	-.943558052269525	3.63636363636364	4.25	3.27777777777778	.296296296296296	.703703703703704	.111111111111111	.481481481481481	12	9	12	1	0
1016480	0	12.4626967830253	3	4	3	-.935436695966627	2.45454545454545	2.75	2.16666666666667	.481481481481481	.62962962962963	.592592592592593	.666666666666667	9	12	12	1	0
1001080	0	13.2046543463381	3	3	2	-.930395171001405	2.72727272727273	3	3.29411764705882	.444444444444444	.72	.555555555555556	99	9	9	9	1	0
1014970	0	12.7008898015058	3	3	2	-.92784883561084	3	3.625	2.88888888888889	.037037037037037	.333333333333333	.222222222222222	.259259259259259	9	9	9	1	0
1000390	1	12.6680355920602	5	5	3	-.91774679244117	3.63636363636364	3.625	4.16666666666667	.333333333333333	.481481481481481	.259259259259259	.37037037037037	12	12	12	1	0
1003170	0	13.2539356605065	3	3	5	-.917357695437322	1.36363636363636	2.125	2.58823529411765	.407407407407407	1.19230769230769	1.03703703703704	.407407407407407	9	9	9	1	0
1000340	0	13.3661875427789	3	3	3	-.914280945055418	3.27272727272727	2.375	2.77777777777778	.148148148148148	.185185185185185	1.07407407407407	.444444444444444	9	9	9	1	0
1013260	1	13.388090349076	2	2	3	-.911122171329303	1.72727272727273	2.25	3	1.03703703703704	1.48148148148148	.962962962962963	1.11111111111111	6	6	6	1	0
1013620	0	13.0020533880903	3	3	3	-.910198142928212	2.09090909090909	3.5	1.66666666666667	.148148148148148	.0740740740740741	.037037037037037	.111111111111111	9	9	9	1	0
1016440	1	99	3	3	4	-.909300869356869	3.54545454545455	3.5	3.11111111111111	.592592592592593	.62962962962963	.481481481481481	1	9	9	9	1	0
1004660	0	12.9664613278576	5	5	3	-.909057791132797	3.63636363636364	3.875	2.55555555555556	.333333333333333	99	99	99	12	12	12	1	0
1003150	1	13.6071184120465	7	4	3	-.908300941444698	2.36363636363636	3.25	2.88888888888889	.222222222222222	.555555555555556	.37037037037037	.259259259259259	16	12	16	1	0
1014520	0	14.299794661191	3	2	3	-.905394258242488	3.54545454545455	4	1.94444444444444	.407407407407407	.851851851851852	.444444444444444	.481481481481481	9	6	9	1	0
1013080	0	14.1848049281314	3	3	4	-.899742186643616	2.27272727272727	2.125	2.77777777777778	.703703703703704	.407407407407407	.888888888888889	.37037037037037	9	9	9	1	0
1004380	0	13.2457221081451	3	2	3	-.884763021722708	3.72727272727273	4	4.22222222222222	.518518518518518	.777777777777778	.703703703703704	.592592592592593	9	6	9	1	0
1016880	0	13.6399726214921	3	3	3	-.884629735868138	3.09090909090909	3.625	2.77777777777778	.481481481481481	.407407407407407	.444444444444444	.407407407407407	9	9	9	1	0
1003090	0	14.6694045174538	3	3	4	-.883178907255177	4	3.75	3.35294117647059	.555555555555556	.703703703703704	.518518518518518	.296296296296296	9	9	9	1	0
1013650	1	13.2210814510609	2	3	3	-.88218018820706	3.90909090909091	4	2.94444444444444	.296296296296296	.555555555555556	.333333333333333	.148148148148148	6	9	9	1	0
1015970	1	13.4565366187543	3	3	5	-.878400254175897	2.81818181818182	3.125	3.11111111111111	.666666666666667	.592592592592593	.851851851851852	.62962962962963	9	9	9	1	0
1001750	0	13.0321697467488	2	3	3	-.875165177067145	2.90909090909091	3.625	4.05555555555556	1.03703703703704	.407407407407407	.185185185185185	.555555555555556	6	9	9	1	0
1000970	0	13.0485968514716	2	2	4	-.873400206710403	2.18181818181818	2.375	2.44444444444444	.592592592592593	99	99	99	6	6	6	1	0
1013560	0	13.0650239561944	2	2	4	-.865887397220406	3.36363636363636	3.75	3.16666666666667	.333333333333333	.592592592592593	.62962962962963	.62962962962963	6	6	6	1	0
1015520	1	12.2710472279261	3	3	5	-.862802367331405	2.45454545454545	2.875	1.88888888888889	.592592592592593	.666666666666667	1.11111111111111	.814814814814815	9	9	9	1	0
1014950	0	14.6064339493498	3	3	4	-.855725010482957	2.81818181818182	2.5	2.77777777777778	.555555555555556	.925925925925926	.666666666666667	1.14814814814815	9	9	9	1	0
1000500	1	12.3394934976044	3	3	3	-.855613915140141	4.27272727272727	3.75	2.72222222222222	.518518518518518	.666666666666667	.333333333333333	.518518518518518	9	9	9	1	0
1002460	0	13.3935660506502	6	3	3	-.853121126306335	2.36363636363636	3.625	2.66666666666667	.62962962962963	.666666666666667	.814814814814815	.777777777777778	15	9	15	1	0
1000510	0	13.5386721423682	3	3	3	-.8522049104309	4	4.125	3.05555555555556	.444444444444444	.851851851851852	.777777777777778	.296296296296296	9	9	9	1	0
1004640	0	12.4106776180698	3	3	3	-.82831770100166	4.18181818181818	4.75	3.55555555555556	.444444444444444	.296296296296296	0	.111111111111111	9	9	9	1	0
1004550	0	12.4079397672827	3	3	3	-.828145703345846	3.45454545454545	2.75	2.16666666666667	.814814814814815	.962962962962963	1	.407407407407407	9	9	9	1	0
1003370	1	14.217659137577	3	1	3	-.820992551707708	2.45454545454545	3.25	2.55555555555556	.185185185185185	.518518518518518	.185185185185185	.0740740740740741	9	0	9	1	0
1015900	0	13.7577002053388	3	2	4	-.820408600259737	3.63636363636364	4.625	1.94444444444444	1	1	.925925925925926	.925925925925926	9	6	9	1	0
1004580	0	12.3997262149213	2	2	5	-.816874365661373	3	2.625	3.16666666666667	.740740740740741	.555555555555556	.407407407407407	.444444444444444	6	6	6	1	0
1014260	0	13.6563997262149	3	3	3	-.811980754026052	3.27272727272727	3.25	3.22222222222222	.185185185185185	.444444444444444	.384615384615385	.481481481481481	9	9	9	1	0
1015850	0	13.9247091033539	3	3	4	-.810171917283696	3.45454545454545	3.375	2.77777777777778	.481481481481481	.592592592592593	.555555555555556	.666666666666667	9	9	9	1	0
1014360	0	12.662559890486	3	3	4	-.799689088320664	4.6	4.25	2.70588235294118	.037037037037037	.481481481481481	.666666666666667	.444444444444444	9	9	9	1	0
1002750	0	14.1574264202601	2	3	3	-.798608707883023	3.18181818181818	4.125	2.38888888888889	.703703703703704	.592592592592593	.592592592592593	.555555555555556	6	9	9	1	0
1003120	0	13.5605749486653	3	3	3	-.795567548923771	3.18181818181818	3	2.29411764705882	.333333333333333	.296296296296296	.148148148148148	.222222222222222	9	9	9	1	0
1016000	1	13.2484599589322	3	2	5	-.784250107140388	3.81818181818182	2.75	2.5	.555555555555556	.62962962962963	.62962962962963	.666666666666667	9	6	9	1	0
1001010	0	13.1827515400411	3	3	3	-.775883691071164	4	2.75	3.05555555555556	.777777777777778	.37037037037037	.555555555555556	.296296296296296	9	9	9	1	0
1015010	0	12.7830253251198	3	3	4	-.772714305522284	3.36363636363636	3.75	3.5	.481481481481481	.555555555555556	.407407407407407	.185185185185185	9	9	9	1	0
1001290	1	12.8377823408624	5	5	2	-.769837070396608	4.54545454545455	3.25	2.55555555555556	.518518518518518	.444444444444444	.37037037037037	99	12	12	12	1	0
1012530	0	12.4380561259411	3	3	4	-.767014399429508	4	3.125	3.55555555555556	.444444444444444	.333333333333333	.481481481481481	.12	9	9	9	1	0
1016870	0	99	5	5	3	-.763850973125853	4.27272727272727	4.375	2.77777777777778	.296296296296296	.185185185185185	.925925925925926	1.25925925925926	12	12	12	1	0
1004480	0	12.6817248459959	3	3	2	-.762208635360652	3.18181818181818	3.375	2.83333333333333	.666666666666667	1.03703703703704	.814814814814815	99	9	9	9	1	0
1014930	0	14.1930184804928	3	3	4	-.759418904280687	3.27272727272727	3.375	2.55555555555556	.481481481481481	.925925925925926	99	99	9	9	9	1	0
1001640	0	14.8117727583847	7	7	3	-.758927994159387	2.45454545454545	1.875	2.77777777777778	.740740740740741	99	99	99	16	16	16	1	0
1016890	0	13.2950034223135	5	5	3	-.750781172116575	2	2.5	2.61111111111111	.851851851851852	1.33333333333333	1.25925925925926	1.40740740740741	12	12	12	1	0
1000780	0	13.2785763175907	2	1	5	-.747699209272906	3.54545454545455	2.625	3.05555555555556	.666666666666667	.407407407407407	.259259259259259	.703703703703704	6	0	6	1	0
1013240	1	13.7029431895962	2	3	3	-.742345772069205	4.09090909090909	4.25	3.05555555555556	.407407407407407	.222222222222222	.259259259259259	.259259259259259	6	9	9	1	0
1013430	0	13.4154688569473	3	3	4	-.741657037727066	4.18181818181818	1.125	4.77777777777778	.518518518518518	.777777777777778	.703703703703704	.518518518518518	9	9	9	1	0
1015420	0	12.3285420944559	2	2	3	-.725112374479701	3.27272727272727	3.375	2.83333333333333	.37037037037037	.407407407407407	.333333333333333	.518518518518518	6	6	6	1	0
1003400	0	12.3750855578371	2	3	3	-.723221950535206	2.72727272727273	1.875	4.16666666666667	.62962962962963	.592592592592593	.740740740740741	.592592592592593	6	9	9	1	0
1000770	1	12.37234770705	3	3	4	-.720503808048522	3.36363636363636	3.25	2.38888888888889	.407407407407407	.62962962962963	.538461538461538	.807692307692308	9	9	9	1	0
1	0	13.6591375770021	2	2	3	-.720410253725722	1.90909090909091	1.5	4.44444444444444	.925925925925926	99	99	99	6	6	6	1	0
1003380	1	14.8145106091718	3	2	3	-.716388659296086	3.72727272727273	4	2.38888888888889	.115384615384615	.111111111111111	.111111111111111	.444444444444444	9	6	9	1	0
1002090	0	13.7357973990418	3	2	4	-.714385560078108	4.18181818181818	3.375	2.22222222222222	.37037037037037	.148148148148148	.407407407407407	.615384615384615	9	6	9	1	0
1001040	0	99	5	4	3	-.71359683935873	3.09090909090909	1.75	4.72222222222222	.888888888888889	.962962962962963	.740740740740741	.851851851851852	12	12	12	1	0
1002060	0	12.4654346338125	5	5	3	-.712441666268329	4	4.75	2.88888888888889	1.03703703703704	.888888888888889	1.07407407407407	.703703703703704	12	12	12	1	0
1001970	0	12.643394934976	3	3	4	-.707777710011965	3.54545454545455	3.125	2.70588235294118	.444444444444444	.666666666666667	.703703703703704	.703703703703704	9	9	9	1	0
1013930	0	12.6488706365503	5	5	2	-.699923766550266	3.09090909090909	3.625	3.05555555555556	.296296296296296	.185185185185185	.222222222222222	.37037037037037	12	12	12	1	0
1004320	0	13.6728268309377	3	3	3	-.691515615971841	3.72727272727273	4.5	4.33333333333333	.666666666666667	.703703703703704	.37037037037037	.888888888888889	9	9	9	1	0
1016930	1	12.7529089664613	3	5	4	-.688064983730454	3.63636363636364	3.625	2.16666666666667	.814814814814815	.703703703703704	.666666666666667	.740740740740741	9	12	12	1	0
1015390	0	11.4414784394251	5	3	4	-.686234882383034	3.09090909090909	3.125	2.5	.962962962962963	1	1.55555555555556	.740740740740741	12	9	12	1	0
1004560	0	13.8699520876112	99	99	99	-.679228933518671	2.54545454545455	3.25	2.61111111111111	.333333333333333	.481481481481481	.444444444444444	.444444444444444	99	99	99	1	0
1015490	1	13.4729637234771	5	5	3	-.67523154493875	2.54545454545455	3.625	2	1.22222222222222	1.07407407407407	1.62962962962963	1.40740740740741	12	12	12	1	0
1014530	0	14.1492128678987	3	3	3	-.672192748921179	3.27272727272727	3.5	2.77777777777778	.807692307692308	1.37037037037037	1.25925925925926	.851851851851852	9	9	9	1	0
1013040	0	12.8542094455852	3	3	3	-.667517278201814	2.63636363636364	3.25	2.94444444444444	.666666666666667	.777777777777778	.62962962962963	.62962962962963	9	9	9	1	0
1015990	0	99	3	5	3	-.665835092352986	3.54545454545455	3.625	2.05555555555556	.592592592592593	.925925925925926	99	99	9	12	12	1	0
1000580	0	13.9164955509925	3	2	3	-.663561402409731	4.81818181818182	1.5	4.77777777777778	1.51851851851852	99	99	99	9	6	9	1	0
1001560	1	12.3668720054757	5	3	4	-.663336307951721	4.09090909090909	1.125	4.94444444444444	.666666666666667	.62962962962963	.62962962962963	.814814814814815	12	9	12	1	0
1003200	0	12.3066392881588	3	3	3	-.662428916103271	3.18181818181818	3.75	2.72222222222222	.296296296296296	.518518518518518	.444444444444444	.444444444444444	9	9	9	1	0
1013470	0	12.5612594113621	5	3	4	-.656944062265352	3.54545454545455	3.57142857142857	2.16666666666667	.407407407407407	.481481481481481	.481481481481481	.444444444444444	12	9	12	1	0
1001770	1	13.0102669404517	3	3	4	-.655289239163404	4	2.875	3.61111111111111	.814814814814815	.407407407407407	.518518518518518	.518518518518518	9	9	9	1	0
1014960	1	13.5386721423682	5	3	3	-.655075462952251	3.72727272727273	3.875	2.66666666666667	.333333333333333	.444444444444444	.185185185185185	.148148148148148	12	9	12	1	0
1015450	0	13.1827515400411	3	2	5	-.646100077457729	2.72727272727273	3.25	2.5	.037037037037037	.111111111111111	.037037037037037	.444444444444444	9	6	9	1	0
1004240	0	13.7166324435318	5	6	3	-.644927577566213	3.72727272727273	3.375	3.22222222222222	1	1	.407407407407407	.62962962962963	12	15	15	1	0
1000140	0	12.8651608487337	5	2	4	-.642150749549251	3.27272727272727	3.625	2.55555555555556	1.2962962962963	1.22222222222222	1.18518518518519	1.18518518518519	12	6	12	1	0
1015470	1	12.5284052019165	3	3	4	-.637341712882844	3.09090909090909	3.75	3.16666666666667	.444444444444444	.740740740740741	.259259259259259	.37037037037037	9	9	9	1	0
1004270	1	13.0924024640657	3	2	4	-.626102618697151	2.27272727272727	1.5	4.33333333333333	.777777777777778	.740740740740741	1	1.22222222222222	9	6	9	1	0
1002030	0	12.2600958247775	3	2	4	-.625582543533161	1.72727272727273	1.5	4.22222222222222	.814814814814815	.888888888888889	99	99	9	6	9	1	0
1001490	0	12.6242299794661	3	3	3	-.62148491816707	3.54545454545455	4.125	3	.259259259259259	.444444444444444	.407407407407407	.518518518518518	9	9	9	1	0
1001990	1	14.5051334702259	2	3	3	-.616738271188513	3.18181818181818	3.5	2.22222222222222	.777777777777778	.888888888888889	.888888888888889	99	6	9	9	1	0
1003390	1	12.8925393566051	5	3	2	-.612466560198611	2.63636363636364	3.5	4.05555555555556	.444444444444444	99	.962962962962963	99	12	9	12	1	0
1000180	0	15.006160164271	2	2	3	-.607358580248808	2.72727272727273	1.75	2.61111111111111	.62962962962963	.481481481481481	.407407407407407	99	6	6	6	1	0
1004440	1	13.3552361396304	3	3	3	-.594562494636361	3.54545454545455	3.625	2.38888888888889	.259259259259259	.259259259259259	.148148148148148	.148148148148148	9	9	9	1	0
1002280	0	13.1444216290212	3	7	4	-.593161392996142	2.72727272727273	1.125	3.94444444444444	.185185185185185	.259259259259259	.481481481481481	.481481481481481	9	16	16	1	0
1015430	1	12.3778234086242	3	5	3	-.588617485753748	2	3.125	2.16666666666667	.62962962962963	.518518518518518	.518518518518518	.481481481481481	9	12	12	1	0
1002760	0	13.429158110883	3	2	2	-.585846566521749	3.27272727272727	2.625	3.22222222222222	.851851851851852	.296296296296296	.703703703703704	99	9	6	9	1	0
1000030	0	13.8316221765914	5	2	3	-.580516256112569	4.27272727272727	4.75	1.11111111111111	.0740740740740741	0	.111111111111111	.148148148148148	12	6	12	1	0
1016450	0	13.5523613963039	2	3	4	-.579431730401365	3.63636363636364	2.875	2.77777777777778	.222222222222222	0	.518518518518518	.333333333333333	6	9	9	1	0
1016010	1	12.4079397672827	5	5	3	-.578908362173016	2.18181818181818	1.875	2.88235294117647	.62962962962963	1	1	.962962962962963	12	12	12	1	0
1013970	1	12.0465434633812	3	5	3	-.578828125397033	2.63636363636364	2.625	3.22222222222222	.407407407407407	.37037037037037	.296296296296296	.37037037037037	9	12	12	1	0
1000820	0	13.0212183436003	2	3	3	-.574473734891334	2.36363636363636	1.875	3.05555555555556	.777777777777778	1.37037037037037	.888888888888889	.925925925925926	6	9	9	1	0
1012640	0	13.5989048596851	3	3	4	-.573267778523952	4.18181818181818	4.625	3.61111111111111	.111111111111111	.185185185185185	.222222222222222	.148148148148148	9	9	9	1	0
1002580	0	15.1101984941821	2	3	3	-.573081040500395	3.45454545454545	4.75	2.72222222222222	.111111111111111	.037037037037037	0	.0384615384615385	6	9	9	1	0
1014040	1	14.2203969883641	3	3	3	-.570877855337863	3.63636363636364	3.375	2.44444444444444	.333333333333333	.333333333333333	.185185185185185	.481481481481481	9	9	9	1	0
1015500	1	12.6050650239562	2	2	3	-.563842534876369	2.18181818181818	3.5	2.72222222222222	.703703703703704	.814814814814815	1	.925925925925926	6	6	6	1	0
1001370	1	13.2484599589322	2	3	3	-.556581386798028	3.81818181818182	5	4.38888888888889	.037037037037037	.444444444444444	.259259259259259	.222222222222222	6	9	9	1	0
1003140	1	12.788501026694	3	3	3	-.55479072617712	3	3.375	2.61111111111111	.185185185185185	.0833333333333333	99	0	9	9	9	1	0
1014050	1	12.4818617385352	3	3	4	-.548623506717656	4.45454545454545	4	2.5	.259259259259259	.592592592592593	.925925925925926	.814814814814815	9	9	9	1	0
1014580	0	12.8761122518823	2	2	3	-.546446784255385	3.54545454545455	3.25	3.11111111111111	.333333333333333	.0740740740740741	.111111111111111	.0740740740740741	6	6	6	1	0
1014110	0	12.6789869952088	5	5	3	-.540865771104682	3.72727272727273	4.25	3.27777777777778	.407407407407407	.37037037037037	.777777777777778	.851851851851852	12	12	12	1	0
1001470	0	13.3141683778234	2	2	5	-.53948667943654	4.27272727272727	3.25	2.38888888888889	.148148148148148	.222222222222222	.0740740740740741	.222222222222222	6	6	6	1	0
1016520	0	14.1492128678987	2	1	5	-.536649732207986	3.90909090909091	3	3.22222222222222	.259259259259259	.333333333333333	.185185185185185	.259259259259259	6	0	6	1	0
1004360	1	13.0650239561944	3	3	3	-.531629016678107	3.45454545454545	3.875	2.5	.555555555555556	.481481481481481	.407407407407407	.518518518518518	9	9	9	1	0
1012560	0	13.1882272416153	2	3	4	-.530177018174662	2.27272727272727	2.75	2.05555555555556	.333333333333333	.444444444444444	.333333333333333	.296296296296296	6	9	9	1	0
1002980	0	12.7008898015058	5	7	2	-.528454364568291	4.63636363636364	4.5	2.77777777777778	.296296296296296	.111111111111111	.296296296296296	.407407407407407	12	16	16	1	0
1015100	0	13.8370978781656	5	3	3	-.524597564453883	4.09090909090909	3.125	3.22222222222222	.37037037037037	.259259259259259	.518518518518518	.777777777777778	12	9	12	1	0
1002560	0	99	3	2	3	-.524152064744959	3.63636363636364	2.625	3.11111111111111	.555555555555556	.62962962962963	.592592592592593	99	9	6	9	1	0
1015050	0	12.6160164271047	3	2	3	-.521601688631049	2.81818181818182	3.125	2.55555555555556	.111111111111111	.222222222222222	.333333333333333	.407407407407407	9	6	9	1	0
1000060	0	99	2	2	5	-.520289724582005	1.63636363636364	1	2.55555555555556	1.5	1.22222222222222	1.51851851851852	1.33333333333333	6	6	6	1	0
1003110	1	14.2614647501711	3	2	2	-.518333275917655	4.09090909090909	4.625	2.11111111111111	.111111111111111	.37037037037037	.222222222222222	.259259259259259	9	6	9	1	0
1001270	0	13.0266940451745	3	3	3	-.511896501427166	4.36363636363636	3.875	2.61111111111111	.407407407407407	.846153846153846	.37037037037037	1.37037037037037	9	9	9	1	0
1013960	1	12.7693360711841	3	3	3	-.508488035356185	3	3.25	3.66666666666667	.407407407407407	.333333333333333	.740740740740741	.962962962962963	9	9	9	1	0
1012590	0	12.4626967830253	3	5	5	-.506560557448408	4.72727272727273	5	3.16666666666667	.333333333333333	.333333333333333	.481481481481481	.851851851851852	9	12	12	1	0
1001000	0	13.1471594798084	3	3	3	-.50474694388753	2.18181818181818	2.14285714285714	3.55555555555556	.222222222222222	.0740740740740741	.111111111111111	.148148148148148	9	9	9	1	0
1013870	1	12.9691991786448	3	3	2	-.504249308640722	4.18181818181818	4	2.5	.777777777777778	.851851851851852	.888888888888889	.888888888888889	9	9	9	1	0
1000570	1	13.2320328542094	2	2	4	-.500346644933914	2.09090909090909	2.625	3.22222222222222	.62962962962963	.703703703703704	.740740740740741	.62962962962963	6	6	6	1	0
1003320	0	13.2676249144422	3	3	3	-.500188580662025	3	3.75	2.61111111111111	.518518518518518	.555555555555556	.296296296296296	1.51851851851852	9	9	9	1	0
1004260	1	12.4216290212183	3	3	2	-.498873516526785	4.09090909090909	3.375	2.38888888888889	1.07407407407407	1	.592592592592593	.407407407407407	9	9	9	1	0
1002920	0	12.5557837097878	3	3	3	-.497179403111574	4.54545454545455	4.75	4.23529411764706	.333333333333333	.592592592592593	.333333333333333	.407407407407407	9	9	9	1	0
1000830	0	13.0458590006845	3	3	3	-.492957872671133	4.09090909090909	3.75	2.44444444444444	.296296296296296	.185185185185185	.111111111111111	.37037037037037	9	9	9	1	0
1013720	1	12.4736481861739	3	3	3	-.488603705210563	4	3.375	2.44444444444444	.111111111111111	.740740740740741	.407407407407407	.407407407407407	9	9	9	1	0
1003040	0	12.4271047227926	5	6	4	-.486937024258222	4.45454545454545	3.125	3.33333333333333	.333333333333333	.444444444444444	99	.592592592592593	12	15	15	1	0
1003130	0	99	2	3	2	-.485189752143429	1.63636363636364	3	1.33333333333333	.75	1	.230769230769231	.615384615384615	6	9	9	1	0
1013740	1	12.4407939767283	3	3	3	-.481540765107737	4.2	5	2.27777777777778	.555555555555556	.259259259259259	.407407407407407	.333333333333333	9	9	9	1	0
1004610	1	13.4866529774127	5	6	3	-.479344839758656	3.09090909090909	1.625	3.83333333333333	.962962962962963	1.03703703703704	.925925925925926	.62962962962963	12	15	15	1	0
1004680	1	13.492128678987	3	3	3	-.474677808622408	2.81818181818182	4.875	2.77777777777778	.481481481481481	.444444444444444	.555555555555556	.592592592592593	9	9	9	1	0
1016900	1	12.0711841204654	3	2	3	-.46699299126938	2.45454545454545	3.125	2.88888888888889	1.11111111111111	1.07407407407407	.740740740740741	.62962962962963	9	6	9	1	0
1014460	1	13.1690622861054	2	2	3	-.46406705696125	3.18181818181818	3.125	2.77777777777778	.962962962962963	1.22222222222222	1	1.14814814814815	6	6	6	1	0
1014600	1	13.1526351813826	3	3	4	-.439976050548396	3.54545454545455	3.875	3.88888888888889	.814814814814815	.925925925925926	1.22222222222222	1.2962962962963	9	9	9	1	0
1000610	1	13.2320328542094	3	3	5	-.436037249486931	4.63636363636364	5	3.72222222222222	.111111111111111	.185185185185185	.185185185185185	.333333333333333	9	9	9	1	0
1013400	1	12.5065023956194	5	3	4	-.435933836787039	4.27272727272727	4.5	2.38888888888889	.333333333333333	.592592592592593	.111111111111111	.62962962962963	12	9	12	1	0
1014560	1	13.4674880219028	4	3	4	-.433412709923081	4.72727272727273	3.25	4.16666666666667	.925925925925926	.62962962962963	.851851851851852	.807692307692308	12	9	12	1	0
1014030	1	14.5106091718001	2	2	3	-.432502075309003	2.09090909090909	4.25	4.33333333333333	.518518518518518	.481481481481481	.555555555555556	.592592592592593	6	6	6	1	0
1001870	1	12.8104038329911	3	3	2	-.424654442797509	3.81818181818182	3.375	3.16666666666667	.407407407407407	.407407407407407	.481481481481481	.592592592592593	9	9	9	1	0
1004340	1	13.0102669404517	3	5	4	-.424265454587286	4	3.5	3.44444444444444	.333333333333333	.777777777777778	.518518518518518	1.03703703703704	9	12	12	1	0
1016500	1	13.2183436002738	3	3	3	-.422597883469783	3.81818181818182	4.125	3.94444444444444	.222222222222222	.481481481481481	.37037037037037	.62962962962963	9	9	9	1	0
1014300	1	12.7145790554415	2	2	3	-.418939734071841	2.27272727272727	1.75	1.88888888888889	.481481481481481	.296296296296296	.222222222222222	.518518518518518	6	6	6	1	0
1002960	1	13.0622861054073	3	4	4	-.418226203689269	3.36363636363636	4.57142857142857	2.16666666666667	.259259259259259	.222222222222222	.0740740740740741	.703703703703704	9	12	12	1	0
1015140	0	12.5612594113621	2	5	3	-.408180213906166	3.90909090909091	2.57142857142857	2.64705882352941	.555555555555556	.481481481481481	.148148148148148	.62962962962963	6	12	12	1	0
1001240	1	13.4784394250513	3	3	3	-.404344270221521	3.81818181818182	3.5	2.11111111111111	.518518518518518	.444444444444444	.407407407407407	.296296296296296	9	9	9	1	0
1012700	0	99	3	2	3	-.400568151126798	2.63636363636364	1.125	4.5	.666666666666667	.925925925925926	1.14814814814815	.703703703703704	9	6	9	1	0
1001310	0	13.119780971937	3	3	3	-.398546917039755	3	3.375	1.77777777777778	.296296296296296	.24	.444444444444444	.259259259259259	9	9	9	1	0
1001480	0	12.7173169062286	3	3	3	-.398274838611716	4.54545454545455	5	3.38888888888889	.185185185185185	.111111111111111	.185185185185185	.111111111111111	9	9	9	1	0
1003520	1	12.4024640657084	2	2	4	-.396975891581453	2.54545454545455	2.125	1.94444444444444	.740740740740741	1.11111111111111	.925925925925926	1	6	6	6	1	0
1003330	1	99	5	3	3	-.393106627745515	3.27272727272727	3.5	3.16666666666667	.333333333333333	.407407407407407	.444444444444444	.666666666666667	12	9	12	1	0
1002880	1	12.4271047227926	2	3	3	-.391382369984221	3	4.125	2.11111111111111	.592592592592593	.555555555555556	.555555555555556	99	6	9	9	1	0
1012890	1	13.6208076659822	3	2	3	-.389985987752877	3.63636363636364	4	2.61111111111111	.148148148148148	.296296296296296	.37037037037037	.37037037037037	9	6	9	1	0
1001820	1	13.2457221081451	5	5	3	-.387493029199118	3.09090909090909	2.375	2.83333333333333	1.07407407407407	1.33333333333333	.925925925925926	.888888888888889	12	12	12	1	0
1001420	1	12.6899383983573	3	3	2	-.384919843267498	4.09090909090909	2.75	3.44444444444444	.407407407407407	.296296296296296	.740740740740741	.407407407407407	9	9	9	1	0
1002610	0	13.0376454483231	3	3	3	-.384557430146275	3.18181818181818	3.5	3.33333333333333	.592592592592593	.518518518518518	.333333333333333	.518518518518518	9	9	9	1	0
1000430	0	13.0431211498973	2	2	3	-.379859907423173	3.27272727272727	3.5	2.22222222222222	.296296296296296	.444444444444444	99	99	6	6	6	1	0
1001280	1	12.2765229295003	5	5	4	-.378006968883654	2.09090909090909	3	2	1	.851851851851852	1.59259259259259	1.07407407407407	12	12	12	1	0
1004590	0	14.5352498288843	5	5	3	-.371625679933138	4	3.875	3.05555555555556	.37037037037037	.37037037037037	.444444444444444	99	12	12	12	1	0
1003290	1	13.5934291581109	3	3	3	-.371610952128848	3.27272727272727	4.25	2.22222222222222	.222222222222222	.296296296296296	.148148148148148	99	9	9	9	1	0
1000400	1	13.8945927446954	5	3	3	-.369688383217214	4.54545454545455	4.25	3.16666666666667	.148148148148148	.259259259259259	.111111111111111	.769230769230769	12	9	12	1	0
1016410	0	12.0711841204654	6	5	3	-.369478741788059	3.54545454545455	1.875	2.38888888888889	.222222222222222	.666666666666667	.111111111111111	.222222222222222	15	12	15	1	0
1002320	0	13.1416837782341	5	3	4	-.364186678569414	4.54545454545455	4.125	3.33333333333333	.62962962962963	1.37037037037037	99	.740740740740741	12	9	12	1	0
1002990	0	13.1362080766598	3	3	5	-.360413136816229	2.90909090909091	3.625	3.11111111111111	.333333333333333	.37037037037037	.148148148148148	.592592592592593	9	9	9	1	0
1001100	1	12.9089664613279	3	3	3	-.35040398244605	3.09090909090909	3.5	4	.592592592592593	1.11111111111111	.666666666666667	.925925925925926	9	9	9	1	0
1000370	0	12.9253935660507	2	2	2	-.350161289573573	3.81818181818182	4.5	1.44444444444444	.259259259259259	.518518518518518	.0740740740740741	.222222222222222	6	6	6	1	0
1012990	0	14.0342231348392	3	3	4	-.346607729935327	3	3	2.72222222222222	.888888888888889	.962962962962963	.814814814814815	1.55555555555556	9	9	9	1	0
1012520	1	13.056810403833	3	4	3	-.345359169038493	3.18181818181818	3.75	2.55555555555556	.555555555555556	.37037037037037	.814814814814815	.777777777777778	9	12	12	1	0
1002450	0	14.0479123887748	2	2	4	-.345197543144364	4.54545454545455	4.25	2.94444444444444	.518518518518518	.407407407407407	.37037037037037	.851851851851852	6	6	6	1	0
1004450	1	12.7501711156742	2	3	3	-.340595577285595	3.27272727272727	4.25	3.11111111111111	.666666666666667	.925925925925926	1.11111111111111	1.03703703703704	6	9	9	1	0
1002570	0	13.1690622861054	6	3	2	-.332284988627325	3.72727272727273	3.875	2.33333333333333	.222222222222222	.555555555555556	1.33333333333333	.777777777777778	15	9	15	1	0
1000920	0	12.8405201916496	3	3	3	-.322440938970822	3.72727272727273	3.625	4.61111111111111	.444444444444444	.259259259259259	.407407407407407	.666666666666667	9	9	9	1	0
1000650	0	13.3114305270363	2	3	4	-.320215734246995	3.18181818181818	3.875	3.11111111111111	.259259259259259	.37037037037037	.111111111111111	.111111111111111	6	9	9	1	0
1003720	0	13.1882272416153	3	3	3	-.317001744546585	1.81818181818182	3.625	2.77777777777778	.296296296296296	.222222222222222	.37037037037037	.148148148148148	9	9	9	1	0
1001110	0	13.637234770705	2	3	4	-.31563776768722	2.18181818181818	3	2.83333333333333	.444444444444444	.518518518518518	.62962962962963	.62962962962963	6	9	9	1	0
1017040	0	13.2046543463381	3	3	3	-.314443620016542	3.36363636363636	3.375	2.61111111111111	.333333333333333	.296296296296296	.518518518518518	.333333333333333	9	9	9	1	0
1015600	1	12.870636550308	3	3	2	-.314276428001622	2.27272727272727	2.75	3.61111111111111	.481481481481481	.592592592592593	.814814814814815	.666666666666667	9	9	9	1	0
1004700	0	12.0657084188912	3	3	3	-.310097969773462	2.27272727272727	3.25	1.72222222222222	.555555555555556	.222222222222222	.333333333333333	.703703703703704	9	9	9	1	0
1002170	0	13.2292950034223	99	99	3	-.310088072730951	4.45454545454545	4.125	3.72222222222222	1.03703703703704	.888888888888889	.62962962962963	.740740740740741	99	99	99	1	0
1002600	1	12.9664613278576	3	4	3	-.309510482183461	2.81818181818182	3.125	2.88888888888889	.541666666666667	.666666666666667	.296296296296296	.518518518518518	9	12	12	1	0
1015930	1	13.2895277207392	3	3	4	-.308995558119036	4	4.25	3.16666666666667	.555555555555556	99	99	99	9	9	9	1	0
1013120	0	99	5	3	2	-.305761664045228	2.45454545454545	4.25	3	.62962962962963	.851851851851852	99	.777777777777778	12	9	12	1	0
1016460	0	11.9534565366188	3	3	3	-.29740319019072	3.27272727272727	3.625	2.11111111111111	.185185185185185	.222222222222222	.444444444444444	.259259259259259	9	9	9	1	0
1016600	1	13.3661875427789	5	5	2	-.295349932654111	5	3.5	3.88235294117647	.851851851851852	1.03703703703704	.666666666666667	99	12	12	12	1	0
1004370	1	13.5222450376454	2	2	5	-.295081219849455	2.90909090909091	3.875	3.83333333333333	.666666666666667	.703703703703704	1.03703703703704	1.2962962962963	6	6	6	1	0
1003510	0	13.2895277207392	3	3	3	-.283983729988056	3.45454545454545	2.375	3.11111111111111	.296296296296296	.576923076923077	.333333333333333	.259259259259259	9	9	9	1	0
1016050	0	14.2340862422998	3	3	4	-.283003236698941	2.81818181818182	3.75	2.44444444444444	.407407407407407	.333333333333333	99	99	9	9	9	1	0
1000900	0	99	3	3	3	-.280488030377443	3.09090909090909	4	1.72222222222222	.962962962962963	.851851851851852	1.11111111111111	1.44444444444444	9	9	9	1	0
1012970	0	13.2731006160164	3	3	4	-.276717819436457	3.54545454545455	3.125	2.83333333333333	.259259259259259	.222222222222222	.296296296296296	.296296296296296	9	9	9	1	0
1015680	1	12.7912388774812	3	3	3	-.274860111447546	4.27272727272727	2.125	1.77777777777778	.518518518518518	.0740740740740741	.592592592592593	.555555555555556	9	9	9	1	0
1013840	1	13.1334702258727	3	3	3	-.26516267508455	4.36363636363636	2.5	3.11111111111111	.518518518518518	.37037037037037	.555555555555556	.333333333333333	9	9	9	1	0
1002770	1	99	3	3	3	-.262765809456008	3.09090909090909	4.75	2.16666666666667	.148148148148148	.592592592592593	.148148148148148	.296296296296296	9	9	9	1	0
1012500	1	12.7227926078029	3	3	5	-.261814316185205	4.54545454545455	1.875	2.05555555555556	.185185185185185	.481481481481481	.666666666666667	99	9	9	9	1	0
1002230	0	12.8021902806297	3	3	3	-.255536046976568	3.27272727272727	2.625	2.55555555555556	.423076923076923	.111111111111111	.259259259259259	.259259259259259	9	9	9	1	0
1003660	1	12.8678986995209	3	3	3	-.250466052057526	1.72727272727273	2.875	3.66666666666667	.185185185185185	.407407407407407	.851851851851852	.37037037037037	9	9	9	1	0
1014180	0	14.1930184804928	3	3	3	-.249327151538989	3.27272727272727	3.625	2.72222222222222	.185185185185185	.592592592592593	.666666666666667	.740740740740741	9	9	9	1	0
1015570	0	13.2785763175907	3	2	4	-.248410176761192	3.36363636363636	3.375	2.27777777777778	.185185185185185	.481481481481481	.148148148148148	.222222222222222	9	6	9	1	0
1013090	0	15.8357289527721	2	2	3	-.242148511678367	2.72727272727273	2.5	2.38888888888889	.518518518518518	.444444444444444	99	99	6	6	6	1	0
1014610	0	12.8898015058179	3	3	5	-.241794585406414	2.45454545454545	3.375	3.72222222222222	.555555555555556	.444444444444444	.62962962962963	.666666666666667	9	9	9	1	0
1016080	1	12.7337440109514	3	3	4	-.239483509700219	4.09090909090909	4.125	3.77777777777778	1.14814814814815	.703703703703704	.592592592592593	.333333333333333	9	9	9	1	0
1015030	1	13.1937029431896	3	3	4	-.235198282499446	3.36363636363636	3.25	2.55555555555556	.703703703703704	.518518518518518	.222222222222222	.185185185185185	9	9	9	1	0
1004300	1	13.0020533880903	2	2	3	-.234188469680723	2.90909090909091	2.625	2.88888888888889	.37037037037037	.481481481481481	.444444444444444	.37037037037037	6	6	6	1	0
1015560	1	14.7241615331964	2	2	3	-.219196325529259	2.90909090909091	2.375	2.11111111111111	.777777777777778	.555555555555556	.407407407407407	.444444444444444	6	6	6	1	0
1015120	1	14.2450376454483	3	3	3	-.215970058933488	5	4.125	3.38888888888889	.814814814814815	.592592592592593	99	99	9	9	9	1	0
1000980	0	13.9630390143737	2	2	4	-.215764492367775	2.36363636363636	2.375	3.77777777777778	.62962962962963	1.2962962962963	.592592592592593	99	6	6	6	1	0
1002270	1	12.3805612594114	3	3	4	-.201270495002756	3.18181818181818	1.5	1.94444444444444	.222222222222222	.0740740740740741	.296296296296296	.148148148148148	9	9	9	1	0
1003780	1	12.5065023956194	6	3	3	-.196964863974914	2.45454545454545	3.28571428571429	2.22222222222222	.37037037037037	.666666666666667	.592592592592593	.666666666666667	15	9	15	1	0
1004250	1	11.3511293634497	2	2	5	-.196722883749445	2.54545454545455	2.625	4.44444444444444	1.11111111111111	1.40740740740741	1.03703703703704	99	6	6	6	1	0
1002530	0	13.7522245037645	2	2	4	-.195297949333175	2.54545454545455	3.75	2.55555555555556	.777777777777778	.296296296296296	.814814814814815	.666666666666667	6	6	6	1	0
1015610	1	13.3415468856947	4	3	3	-.192145799310621	3.45454545454545	3.125	2.44444444444444	.407407407407407	.703703703703704	.444444444444444	.62962962962963	12	9	12	1	0
1015440	1	13.6180698151951	3	3	3	-.19081130935589	1.63636363636364	2.125	2.88235294117647	.777777777777778	.481481481481481	.851851851851852	.703703703703704	9	9	9	1	0
1001810	1	12.9089664613279	3	3	3	-.18946107955116	2.90909090909091	3.625	3	.444444444444444	.481481481481481	.481481481481481	.814814814814815	9	9	9	1	0
1000560	1	13.8398357289528	5	3	3	-.188795576597201	3.27272727272727	3.125	2	.148148148148148	99	0	.222222222222222	12	9	12	1	0
1001380	0	13.2785763175907	3	2	4	-.185856881582757	3.18181818181818	3.75	2.44444444444444	.962962962962963	99	99	99	9	6	9	1	0
1014590	0	12.3997262149213	3	3	3	-.178154203189984	3.36363636363636	3.75	1.83333333333333	.692307692307692	.62962962962963	.666666666666667	.851851851851852	9	9	9	1	0
1014130	0	12.5776865160849	3	3	3	-.177211286819011	2	1.625	1.11111111111111	1.38461538461538	1.11111111111111	1.11111111111111	.851851851851852	9	9	9	1	0
1015980	0	13.6865160848734	3	2	4	-.17588498914065	3.27272727272727	1.5	4.38888888888889	.814814814814815	.592592592592593	.814814814814815	.777777777777778	9	6	9	1	0
1000410	0	12.476386036961	2	2	3	-.173567300764055	3.63636363636364	4.5	2.72222222222222	.481481481481481	.296296296296296	.259259259259259	.259259259259259	6	6	6	1	0
1015200	0	12.5311430527036	3	3	3	-.172640208103019	3.72727272727273	3.14285714285714	3.55555555555556	.333333333333333	.851851851851852	1.14814814814815	1.22222222222222	9	9	9	1	0
1002830	0	13.3935660506502	3	3	2	-.166286778119583	4.18181818181818	3.75	2.55555555555556	.269230769230769	.222222222222222	.222222222222222	.111111111111111	9	9	9	1	0
1002520	0	13.0130047912389	3	2	3	-.158559404977496	3.45454545454545	4	2.16666666666667	.37037037037037	.259259259259259	.259259259259259	.777777777777778	9	6	9	1	0
1001460	1	13.6344969199179	3	3	2	-.154023509802798	1.7	2.125	3.05555555555556	.703703703703704	.518518518518518	.555555555555556	.481481481481481	9	9	9	1	0
1015940	0	12.7227926078029	5	5	3	-.149875509360618	3.63636363636364	2.625	2.57142857142857	.148148148148148	.296296296296296	.518518518518518	1.11111111111111	12	12	12	1	0
1014470	0	14.0780287474333	3	2	3	-.148919950599133	3.54545454545455	3.875	1.88888888888889	.814814814814815	1.18518518518519	.62962962962963	.777777777777778	9	6	9	1	0
1001880	1	12.6105407255305	3	3	3	-.14865344937172	3.63636363636364	2.75	2.5	.518518518518518	.703703703703704	.592592592592593	.481481481481481	9	9	9	1	0
1004190	0	99	4	3	4	-.147512363829269	2.27272727272727	4.25	1.66666666666667	.259259259259259	0	.0740740740740741	0	12	9	12	1	0
1002290	1	12.9363449691992	3	3	3	-.144816015134844	3.09090909090909	1.375	3.11111111111111	.888888888888889	1.48148148148148	.62962962962963	.62962962962963	9	9	9	1	0
1001500	0	13.0924024640657	4	3	2	-.142099572390304	4.18181818181818	3.875	3.44444444444444	.407407407407407	.296296296296296	.296296296296296	.111111111111111	12	9	12	1	0
1013710	1	13.1033538672142	5	3	3	-.140487872710093	2.90909090909091	3.71428571428571	2.33333333333333	.222222222222222	.185185185185185	.444444444444444	.259259259259259	12	9	12	1	0
1002480	0	13.741273100616	3	5	5	-.138534716026757	3	3.25	3.11111111111111	.518518518518518	.37037037037037	.814814814814815	.814814814814815	9	12	12	1	0
1015070	1	13.4537987679671	3	3	4	-.135464818461724	4.90909090909091	3.75	2.44444444444444	.481481481481481	.37037037037037	.444444444444444	.777777777777778	9	9	9	1	0
1014540	0	12.5338809034908	3	3	5	-.133006539093651	3.54545454545455	3.25	3	.259259259259259	.37037037037037	.296296296296296	.296296296296296	9	9	9	1	0
1001980	0	12.0438056125941	3	3	2	-.13292933989512	2.90909090909091	4.75	2.33333333333333	.148148148148148	.222222222222222	.740740740740741	.76	9	9	9	1	0
1004160	0	13.3004791238877	3	3	3	-.129434350466042	3	1.375	3.22222222222222	.518518518518518	1	.703703703703704	.851851851851852	9	9	9	1	0
1000210	0	14.8090349075975	3	2	4	-.124024544967979	2.18181818181818	4.125	3.72222222222222	.185185185185185	.185185185185185	.259259259259259	.222222222222222	9	6	9	1	0
1015640	0	12.3696098562628	4	6	3	-.121715571708418	3.45454545454545	4.125	1.5	.259259259259259	.555555555555556	.481481481481481	.814814814814815	12	15	15	1	0
1003440	1	12.5338809034908	2	4	3	-.121018975805907	3.36363636363636	4	3.61111111111111	.444444444444444	.592592592592593	.444444444444444	.666666666666667	6	12	12	1	0
1001580	0	12.8131416837782	3	3	3	-.116117921696108	5	1.625	1	1.14814814814815	.814814814814815	99	1.03703703703704	9	9	9	1	0
1013490	0	12.6379192334018	3	3	4	-.11563833992707	3.18181818181818	4.375	3.22222222222222	1.15384615384615	1.59259259259259	1.34615384615385	1.37037037037037	9	9	9	1	0
1000600	1	13.0458590006845	5	3	4	-.115475248796728	4.09090909090909	4.375	4.38888888888889	.851851851851852	.962962962962963	.777777777777778	.592592592592593	12	9	12	1	0
1001360	0	13.1225188227242	7	4	2	-.114689010246909	2.90909090909091	4.125	2	.481481481481481	.777777777777778	.62962962962963	.592592592592593	16	12	16	1	0
1016940	0	13.0431211498973	5	5	3	-.113479547177827	3.09090909090909	2.375	1.77777777777778	.62962962962963	.851851851851852	.925925925925926	.740740740740741	12	12	12	1	0
1013190	1	12.4736481861739	3	3	4	-.11082252057699	3.18181818181818	2.75	4.11111111111111	.296296296296296	.111111111111111	.0740740740740741	.222222222222222	9	9	9	1	0
1000930	1	13.264887063655	3	3	5	-.109553912900111	3	2.75	2.55555555555556	.703703703703704	1	.851851851851852	.740740740740741	9	9	9	1	0
1013700	1	12.0164271047228	3	5	3	-.108965217136021	3.54545454545455	3.5	2.77777777777778	.555555555555556	.851851851851852	1.22222222222222	1.25925925925926	9	12	12	1	0
1015460	0	13.0759753593429	3	5	4	-.106089191658353	4.27272727272727	4.375	2.44444444444444	.222222222222222	.222222222222222	.185185185185185	.037037037037037	9	12	12	1	0
1003310	1	12.9609856262834	4	4	3	-.104667804721181	3.09090909090909	1.5	2.72222222222222	.592592592592593	.37037037037037	.333333333333333	.259259259259259	12	12	12	1	0
1000040	0	14.507871321013	3	3	3	-.104131237410511	2.81818181818182	2.875	2.33333333333333	.296296296296296	.925925925925926	.592592592592593	99	9	9	9	1	0
1015580	1	12.7091033538672	3	3	3	-.102148799866063	4.36363636363636	4.625	2.61111111111111	.407407407407407	.592592592592593	.481481481481481	.333333333333333	9	9	9	1	0
1017000	1	12.6461327857632	5	3	3	-.101206034551639	3.90909090909091	3.125	3.61111111111111	.111111111111111	.148148148148148	.148148148148148	.777777777777778	12	9	12	1	0
1000880	1	12.5831622176591	2	3	3	-.101016226628774	4.54545454545455	4.375	3.33333333333333	.555555555555556	.444444444444444	.333333333333333	.333333333333333	6	9	9	1	0
1015160	1	12.6926762491444	3	4	3	-.0979072030225039	4	3.75	2.38888888888889	.148148148148148	.037037037037037	.037037037037037	0	9	12	12	1	0
1013830	1	12.2409308692676	3	3	3	-.0977428070016314	4.54545454545455	4.625	2.17647058823529	.296296296296296	.0740740740740741	.185185185185185	.222222222222222	9	9	9	1	0
1003180	0	12.7720739219713	5	6	3	-.0966450201563558	3.09090909090909	3.5	2.83333333333333	.444444444444444	.555555555555556	.407407407407407	.333333333333333	12	15	15	1	0
1013540	0	12.9226557152635	3	3	3	-.0961240112792753	2.63636363636364	3.625	2.33333333333333	.555555555555556	.407407407407407	.333333333333333	.296296296296296	9	9	9	1	0
1014990	1	13.5386721423682	3	3	4	-.0942118419207234	3.27272727272727	3.75	3.77777777777778	.851851851851852	.777777777777778	.423076923076923	.740740740740741	9	9	9	1	0
1002850	0	13.1115674195756	3	3	3	-.0936803120119377	3.81818181818182	4.75	3.27777777777778	.444444444444444	.222222222222222	.259259259259259	.296296296296296	9	9	9	1	0
1013350	1	12.37234770705	3	3	4	-.0930504640722647	4.45454545454545	2.75	2.61111111111111	.222222222222222	.851851851851852	.62962962962963	.740740740740741	9	9	9	1	0
1004570	0	13.2895277207392	5	3	3	-.087772826704772	3.27272727272727	4.75	2	.296296296296296	.333333333333333	.148148148148148	.037037037037037	12	9	12	1	0
1001800	0	13.7549623545517	3	2	3	-.0874020466924136	3	4.125	1.77777777777778	.518518518518518	.37037037037037	.407407407407407	99	9	6	9	1	0
1000440	1	13.1772758384668	3	3	4	-.0863325012567994	3.63636363636364	4.5	3.66666666666667	.444444444444444	.481481481481481	.37037037037037	.740740740740741	9	9	9	1	0
1003640	0	11.5290896646133	3	3	3	-.0839324089681772	3.09090909090909	3.125	2.77777777777778	.407407407407407	.222222222222222	.333333333333333	.148148148148148	9	9	9	1	0
1016620	1	12.621492128679	5	5	3	-.0827719675381269	4.63636363636364	4.75	2.16666666666667	.148148148148148	.148148148148148	.259259259259259	.148148148148148	12	12	12	1	0
1000070	1	12.3860369609856	3	3	3	-.079791476728124	3.27272727272727	2.25	2.72222222222222	.962962962962963	.814814814814815	.851851851851852	1.25925925925926	9	9	9	1	0
1003160	1	12.4216290212183	3	3	2	-.0793145552653424	2.27272727272727	1.25	3.16666666666667	.111111111111111	.444444444444444	.666666666666667	.592592592592593	9	9	9	1	0
1015080	1	13.5140314852841	2	3	3	-.07701040272472	3.18181818181818	3.875	2.72222222222222	.185185185185185	.222222222222222	.222222222222222	.296296296296296	6	9	9	1	0
1002820	0	16.1286789869952	3	3	3	-.0761750441226837	3	3.625	2.72222222222222	.851851851851852	1.03703703703704	.814814814814815	.518518518518518	9	9	9	1	0
1012710	0	13.3169062286105	3	3	5	-.0756476386413587	4.09090909090909	3.75	2.66666666666667	.37037037037037	.555555555555556	.37037037037037	.888888888888889	9	9	9	1	0
1016510	0	13.8370978781656	3	3	3	-.0730178590878632	3.63636363636364	4	2.94444444444444	.703703703703704	.777777777777778	.333333333333333	.481481481481481	9	9	9	1	0
1013570	0	99	3	3	4	-.0707959026841341	3	3.125	2.83333333333333	.481481481481481	.888888888888889	.814814814814815	.851851851851852	9	9	9	1	0
1015730	1	12.807665982204	3	3	4	-.0696228701518925	2.36363636363636	2.25	1.94444444444444	.444444444444444	.111111111111111	.111111111111111	.296296296296296	9	9	9	1	0
1001860	1	13.015742642026	3	2	4	-.0693616292586483	3.27272727272727	3.375	3.44444444444444	.703703703703704	.481481481481481	.37037037037037	1.03703703703704	9	6	9	1	0
1000530	1	13.429158110883	2	3	3	-.0637533478531579	2.72727272727273	3.375	2.66666666666667	.444444444444444	.555555555555556	.62962962962963	.555555555555556	6	9	9	1	0
1016030	0	12.5968514715948	3	2	3	-.0606869995899978	3.27272727272727	3	3.44444444444444	.888888888888889	1.11111111111111	1	1.33333333333333	9	6	9	1	0
1016980	0	13.1088295687885	5	3	4	-.0579066746674713	4.81818181818182	3.5	2.44444444444444	.481481481481481	.444444444444444	.333333333333333	.407407407407407	12	9	12	1	0
1000380	0	13.0540725530459	3	2	3	-.0570493342198654	3.09090909090909	4.125	3.72222222222222	.962962962962963	.888888888888889	.814814814814815	1.14814814814815	9	6	9	1	0
1001550	0	12.9418206707734	3	3	3	-.0542228908156086	3.18181818181818	2.625	2.77777777777778	.740740740740741	.777777777777778	.518518518518518	.851851851851852	9	9	9	1	0
1003270	1	12.7720739219713	3	3	3	-.0512979774781689	4.36363636363636	4.75	3.72222222222222	.777777777777778	.666666666666667	.148148148148148	.222222222222222	9	9	9	1	0
1004460	0	12.6981519507187	5	3	3	-.0506827717495931	4.90909090909091	3.625	4.05555555555556	.555555555555556	0	0	0	12	9	12	1	0
1002780	1	12.37234770705	3	3	3	-.042683586944208	3	2.75	2.94117647058824	.296296296296296	.333333333333333	.777777777777778	.703703703703704	9	9	9	1	0
1002470	1	13.2156057494867	3	3	4	-.0400762926673165	3.18181818181818	3.125	2.83333333333333	1.14814814814815	1.44444444444444	1.44444444444444	1.37037037037037	9	9	9	1	0
1016920	0	13.119780971937	3	3	4	-.0391917357667137	3.81818181818182	2.875	2.94444444444444	.423076923076923	.518518518518518	.518518518518518	.407407407407407	9	9	9	1	0
1015510	0	13.0677618069815	2	1	3	-.0373235999116722	3.09090909090909	3.625	2.27777777777778	.62962962962963	.538461538461538	.62962962962963	.592592592592593	6	0	6	1	0
1001170	1	13.0595482546201	3	2	3	-.0360410985587185	3.18181818181818	3.875	4	.592592592592593	.518518518518518	.407407407407407	.37037037037037	9	6	9	1	0
1001060	0	12.0985626283368	3	3	3	-.0353649564685526	4.45454545454545	4.5	2.66666666666667	.888888888888889	.777777777777778	.185185185185185	.740740740740741	9	9	9	1	0
1002300	1	12.8131416837782	5	3	3	-.0333816586876937	3.36363636363636	3.875	1.88888888888889	.62962962962963	.888888888888889	.333333333333333	.703703703703704	12	9	12	1	0
1014160	0	99	3	3	2	-.0329683039123351	4	5	2.5	.37037037037037	.62962962962963	.518518518518518	.703703703703704	9	9	9	1	0
1000670	0	99	3	3	4	-.0314617830096435	3.36363636363636	3.5	3.44444444444444	.555555555555556	.407407407407407	.296296296296296	.222222222222222	9	9	9	1	0
1015280	0	12.9144421629021	3	2	3	-.0298852419462768	4.45454545454545	5	3.22222222222222	.777777777777778	1.14814814814815	.888888888888889	1.18518518518519	9	6	9	1	0
1013180	0	13.7659137577002	3	3	4	-.0297425459017696	2.27272727272727	2.375	2	.555555555555556	.407407407407407	.423076923076923	.518518518518518	9	9	9	1	0
1000520	0	12.37234770705	5	3	3	-.029466919804995	2.81818181818182	2.875	1.88888888888889	.666666666666667	.518518518518518	.444444444444444	.407407407407407	12	9	12	1	0
1015620	0	13.1882272416153	3	3	3	-.0286636623457574	3.72727272727273	4.375	3.82352941176471	.37037037037037	.296296296296296	.296296296296296	.518518518518518	9	9	9	1	0
1001590	1	13.1498973305955	3	3	4	-.0266409285526789	2.4	1.25	4.05555555555556	1.14814814814815	1.18518518518519	1.11111111111111	1.81481481481481	9	9	9	1	0
1015960	0	13.4976043805613	3	3	3	-.0233673962469941	3.45454545454545	3.375	2.44444444444444	.333333333333333	.37037037037037	.444444444444444	.333333333333333	9	9	9	1	0
1013680	1	12.4681724845996	3	3	3	-.0222720670443067	2.90909090909091	3.375	2.5	.444444444444444	.481481481481481	.481481481481481	.62962962962963	9	9	9	1	0
1002800	1	13.2402464065708	3	3	3	-.0184505901705456	3.81818181818182	4.625	2.38888888888889	.37037037037037	.444444444444444	.444444444444444	.37037037037037	9	9	9	1	0
1003710	1	12.8240930869268	3	3	3	-.0180633806608886	3.54545454545455	3.75	1.83333333333333	.37037037037037	.555555555555556	.592592592592593	.333333333333333	9	9	9	1	0
1000700	0	12.7446954140999	3	3	4	-.0157827664198822	2.72727272727273	2.625	2.55555555555556	.555555555555556	.185185185185185	.148148148148148	.481481481481481	9	9	9	1	0
1012940	1	13.1800136892539	3	3	3	-.0144442681175109	4.18181818181818	3.625	3.16666666666667	.222222222222222	.296296296296296	.296296296296296	.777777777777778	9	9	9	1	0
1002790	1	12.3750855578371	3	2	3	-.00684517972639557	1.18181818181818	2.125	2.55555555555556	1.03703703703704	.962962962962963	.925925925925926	1	9	6	9	1	0
1001130	0	13.7577002053388	3	2	3	-.00679487479859486	3.36363636363636	4	2.33333333333333	.296296296296296	.148148148148148	.185185185185185	.148148148148148	9	6	9	1	0
1012580	1	14.3600273785079	2	2	3	-.00361321952187508	3.63636363636364	3.625	3.66666666666667	.185185185185185	.37037037037037	.37037037037037	.037037037037037	6	6	6	1	0
1013800	1	13.4154688569473	3	3	3	-.0029762525616455	2.81818181818182	3.5	2.16666666666667	.185185185185185	.592592592592593	.555555555555556	.481481481481481	9	9	9	1	0
1016530	1	12.6324435318275	3	3	4	-.00175285518334642	4.63636363636364	2.5	2.22222222222222	.777777777777778	.037037037037037	.148148148148148	.222222222222222	9	9	9	1	0
1015920	0	12.952772073922	3	3	4	-.000510753326464806	2.90909090909091	2.875	2.29411764705882	.925925925925926	.740740740740741	.666666666666667	.518518518518518	9	9	9	1	0
1000200	1	12.9691991786448	2	2	3	.00120755917034452	3.45454545454545	3.625	3.05555555555556	1.03703703703704	1.18518518518519	.333333333333333	.666666666666667	6	6	6	1	0
1013530	0	12.5010266940452	5	5	2	.00126400050937548	3.81818181818182	3.25	3.05555555555556	.37037037037037	.481481481481481	.407407407407407	.259259259259259	12	12	12	1	0
1014070	0	12.974674880219	3	3	5	.00192315838889	3	3.875	3.44444444444444	.925925925925926	.703703703703704	.666666666666667	.555555555555556	9	9	9	1	0
1001330	0	12.5256673511294	2	3	4	.00785704090558443	2.63636363636364	2.125	3.88888888888889	.555555555555556	1.03703703703704	.851851851851852	.407407407407407	6	9	9	1	0
1013410	1	13.6810403832991	3	3	3	.00976972377237311	2	2.875	1.94444444444444	.407407407407407	.703703703703704	.481481481481481	.222222222222222	9	9	9	1	0
1015260	1	12.1149897330595	3	4	3	.011325382881212	3.54545454545455	4.75	2.66666666666667	.692307692307692	.703703703703704	.666666666666667	.925925925925926	9	12	12	1	0
1017030	0	12.7118412046543	3	3	3	.0141252323520687	2.72727272727273	2.875	2.5	.740740740740741	.666666666666667	.962962962962963	.962962962962963	9	9	9	1	0
1017020	1	13.3086926762491	3	3	3	.0165284385007824	3.63636363636364	3	2.88888888888889	.62962962962963	.407407407407407	.851851851851852	.962962962962963	9	9	9	1	0
1014690	1	13.1964407939767	3	3	3	.0302966132869277	3.63636363636364	3.75	2.22222222222222	.296296296296296	.37037037037037	.222222222222222	.185185185185185	9	9	9	1	0
1015180	0	13.9055441478439	3	3	2	.0303732995176173	4.36363636363636	3.25	2.33333333333333	.259259259259259	.111111111111111	.111111111111111	.148148148148148	9	9	9	1	0
1004350	0	13.9247091033539	3	2	3	.036190614675546	1.36363636363636	1.25	3.77777777777778	.703703703703704	.62962962962963	.666666666666667	.777777777777778	9	6	9	1	0
1012900	1	13.2895277207392	3	3	3	.0388357746883165	3.18181818181818	3.875	2.77777777777778	.333333333333333	.259259259259259	.111111111111111	.444444444444444	9	9	9	1	0
1004520	0	13.4045174537988	5	3	4	.0412794969481452	3.90909090909091	3.875	3.66666666666667	.461538461538462	.62962962962963	.0740740740740741	.185185185185185	12	9	12	1	0
1015090	0	12.6981519507187	3	3	3	.0419167870593989	4.81818181818182	4.125	2.61111111111111	.222222222222222	.444444444444444	.185185185185185	.925925925925926	9	9	9	1	0
1001830	0	13.2731006160164	2	3	4	.0424725887258037	3.54545454545455	3.125	2.61111111111111	.653846153846154	.37037037037037	.666666666666667	.222222222222222	6	9	9	1	0
1000420	0	12.7282683093771	3	3	3	.0450134110352928	2.81818181818182	3	2.61111111111111	.592592592592593	.555555555555556	.518518518518518	99	9	9	9	1	0
1003260	1	12.6132785763176	5	5	3	.0474518462949285	3.54545454545455	1.75	4.61111111111111	.666666666666667	.703703703703704	.703703703703704	.333333333333333	12	12	12	1	0
1002810	1	13.2758384668036	3	3	3	.0476423390163599	3.54545454545455	3.5	3.11111111111111	.333333333333333	.962962962962963	.777777777777778	.777777777777778	9	9	9	1	0
1001850	1	13.2183436002738	3	3	3	.0564254889156538	3.90909090909091	2.75	4.55555555555556	.37037037037037	.481481481481481	.592592592592593	.555555555555556	9	9	9	1	0
1000260	1	13.7029431895962	3	3	3	.0587766836108685	1.63636363636364	2.625	4	.851851851851852	.925925925925926	.777777777777778	.444444444444444	9	9	9	1	0
1003080	1	13.0951403148528	3	3	5	.0598638676654764	2.81818181818182	2.75	1.88888888888889	.62962962962963	.740740740740741	.666666666666667	.888888888888889	9	9	9	1	0
1004000	0	12.9555099247091	3	3	4	.0606858637581617	3.54545454545455	3	3.55555555555556	.62962962962963	.592592592592593	.481481481481481	.62962962962963	9	9	9	1	0
1004140	0	13.1663244353183	5	5	5	.0621918755686746	3.36363636363636	2.75	3.27777777777778	.925925925925926	1.40740740740741	.740740740740741	.37037037037037	12	12	12	1	0
1000050	0	13.7275838466804	3	3	3	.0637039017789829	3.36363636363636	4.875	3.22222222222222	.333333333333333	.592592592592593	.481481481481481	.518518518518518	9	9	9	1	0
1002310	0	12.3148528405202	3	3	3	.0663888738316783	3.09090909090909	2.25	3.44444444444444	.555555555555556	.518518518518518	.703703703703704	.423076923076923	9	9	9	1	0
1001840	0	12.5037645448323	5	3	3	.0675709206765825	4.27272727272727	3.375	2.55555555555556	.481481481481481	.111111111111111	.518518518518518	.592592592592593	12	9	12	1	0
1004490	1	13.3086926762491	3	3	3	.0693496092652597	4.72727272727273	4.375	4.23529411764706	.888888888888889	.740740740740741	.666666666666667	.444444444444444	9	9	9	1	0
1002010	1	12.6543463381246	2	2	4	.0811385816667092	2.90909090909091	3.42857142857143	2.44444444444444	.407407407407407	.555555555555556	.407407407407407	.481481481481481	6	6	6	1	0
1014370	1	12.7173169062286	3	3	3	.082624410255829	2.63636363636364	2.5	3.72222222222222	.444444444444444	.592592592592593	.444444444444444	.592592592592593	9	9	9	1	0
1001620	1	13.5195071868583	3	3	3	.0844117216186104	1.4	3.125	2.44444444444444	.703703703703704	.703703703703704	.703703703703704	.518518518518518	9	9	9	1	0
1014490	0	11.5947980835044	2	5	2	.0857745786411212	4.90909090909091	4.375	2.83333333333333	.259259259259259	.0740740740740741	.111111111111111	.185185185185185	6	12	12	1	0
1014570	1	13.1964407939767	3	5	4	.0862255046050392	4	2.875	2.88888888888889	.518518518518518	.407407407407407	.407407407407407	.259259259259259	9	12	12	1	0
1015880	0	12.290212183436	3	3	4	.0863721010752403	4.18181818181818	1.875	4.77777777777778	.62962962962963	1.25925925925926	.888888888888889	.481481481481481	9	9	9	1	0
1002430	1	13.7248459958932	2	5	3	.0881751735658185	2.63636363636364	4.25	1.33333333333333	.481481481481481	.555555555555556	.481481481481481	.592592592592593	6	12	12	1	0
1014510	0	99	2	2	5	.091802301188777	3.54545454545455	3.625	2.66666666666667	.481481481481481	.259259259259259	.37037037037037	.185185185185185	6	6	6	1	0
1015210	0	12.7556468172485	3	3	4	.0949414727630726	4	3.375	3	.148148148148148	.185185185185185	.444444444444444	.592592592592593	9	9	9	1	0
1002360	1	12.9472963723477	6	3	3	.0952606047148667	2.90909090909091	4.625	2.33333333333333	.518518518518518	.222222222222222	.555555555555556	99	15	9	15	1	0
1015480	0	13.1170431211499	2	2	3	.095418311329556	3.09090909090909	3.375	2.44444444444444	.296296296296296	.333333333333333	.592592592592593	.703703703703704	6	6	6	1	0
1017060	1	13.4017796030116	3	2	3	.102417863297871	3.54545454545455	4.375	3	.407407407407407	.259259259259259	.259259259259259	.185185185185185	9	6	9	1	0
1002630	1	12.2108145106092	5	5	3	.106118694710947	2.45454545454545	3.75	2.27777777777778	.037037037037037	.296296296296296	.259259259259259	.185185185185185	12	12	12	1	0
1017090	1	13.8042436687201	3	3	4	.107803551168433	4.36363636363636	4.75	1.5	.37037037037037	.481481481481481	.407407407407407	.407407407407407	9	9	9	1	0
1014550	0	12.7337440109514	3	3	3	.108489480709999	3.72727272727273	4.375	3.83333333333333	.37037037037037	.777777777777778	.222222222222222	1	9	9	9	1	0
1013150	0	13.0951403148528	3	3	3	.112065408231021	3.90909090909091	5	2.16666666666667	1.25925925925926	.703703703703704	99	99	9	9	9	1	0
1003240	1	13.2484599589322	4	5	3	.112354045432273	4.36363636363636	2.875	4.66666666666667	.555555555555556	1.07692307692308	1.11111111111111	.962962962962963	12	12	12	1	0
1013510	0	12.7008898015058	3	3	4	.116475342533851	2.72727272727273	3.5	3.11111111111111	.62962962962963	.666666666666667	.407407407407407	.518518518518518	9	9	9	1	0
1014330	1	12.8049281314168	5	3	4	.117217497826744	2.63636363636364	2.25	1.55555555555556	.703703703703704	.296296296296296	.296296296296296	.230769230769231	12	9	12	1	0
1001700	0	13.1937029431896	5	5	2	.120369763350097	4.27272727272727	4	3.38888888888889	.37037037037037	.111111111111111	.0769230769230769	.111111111111111	12	12	12	1	0
1001030	0	14.4969199178645	2	2	4	.128958588882549	3.90909090909091	3.5	3.44444444444444	.703703703703704	.592592592592593	99	99	6	6	6	1	0
1000960	1	13.2183436002738	3	3	3	.132257518000677	4.27272727272727	4	3.61111111111111	.481481481481481	.518518518518518	.62962962962963	1.11111111111111	9	9	9	1	0
1000220	1	12.3093771389459	4	3	3	.133859906868862	3.54545454545455	3.625	3.22222222222222	.259259259259259	.259259259259259	.296296296296296	.296296296296296	12	9	12	1	0
1013320	1	14.8774811772758	2	2	3	.135252563489424	2.81818181818182	3.375	3.38888888888889	.777777777777778	.851851851851852	.962962962962963	.962962962962963	6	6	6	1	0
1013810	1	12.72553045859	3	3	4	.135299559472542	3.09090909090909	4.625	2.61111111111111	.407407407407407	.407407407407407	.296296296296296	.148148148148148	9	9	9	1	0
1017100	0	13.6208076659822	3	3	4	.135485199524324	2.54545454545455	2.375	3.88888888888889	.666666666666667	.481481481481481	.555555555555556	1	9	9	9	1	0
1001340	1	12.8542094455852	3	3	3	.135938879877199	2.90909090909091	3.625	2.72222222222222	.518518518518518	.814814814814815	.518518518518518	.518518518518518	9	9	9	1	0
1000660	0	14.2505133470226	5	3	3	.1373035683341	2.63636363636364	2.25	3	.703703703703704	1.22222222222222	.740740740740741	1.07407407407407	12	9	12	1	0
1001050	1	12.2135523613963	3	3	3	.142369560046446	2.72727272727273	2.625	3.11111111111111	.555555555555556	.703703703703704	.666666666666667	.740740740740741	9	9	9	1	0
1003950	0	13.0403832991102	3	4	4	.143215931618396	3.54545454545455	2.375	4.33333333333333	.62962962962963	.703703703703704	.814814814814815	1.14814814814815	9	12	12	1	0
1013980	1	13.1909650924025	3	3	3	.143657758967175	3.72727272727273	3.25	1.61111111111111	.333333333333333	.461538461538462	.703703703703704	.407407407407407	9	9	9	1	0
1002650	0	12.4544832306639	2	3	2	.15012812017946	3	2.75	2.33333333333333	.730769230769231	.37037037037037	.259259259259259	.222222222222222	6	9	9	1	0
1016060	0	12.7748117727584	3	3	4	.154833639055719	3.72727272727273	3.625	3.27777777777778	.814814814814815	.814814814814815	.925925925925926	.592592592592593	9	9	9	1	0
1013940	0	12.5311430527036	3	3	4	.155563814236064	4.36363636363636	4.25	1.77777777777778	.592592592592593	.481481481481481	.307692307692308	.148148148148148	9	9	9	1	0
1016780	1	12.4709103353867	6	5	4	.156185363495016	2.72727272727273	2.5	2.72222222222222	1.03703703703704	.888888888888889	.703703703703704	.703703703703704	15	12	15	1	0
1016550	1	12.3832991101985	5	3	3	.156352686882689	3	3.5	2	.384615384615385	.259259259259259	.333333333333333	.518518518518518	12	9	12	1	0
1013630	0	12.2381930184805	3	3	3	.157123958964045	3.36363636363636	3	2.44444444444444	.111111111111111	.0740740740740741	.148148148148148	.111111111111111	9	9	9	1	0
1012920	1	14.9130732375086	3	3	3	.162820012321508	3.90909090909091	3.875	3	0	.0740740740740741	.148148148148148	.037037037037037	9	9	9	1	0
1013220	1	12.8049281314168	3	4	3	.164648816997548	3.18181818181818	3.875	4.16666666666667	.296296296296296	.814814814814815	.703703703703704	1	9	12	12	1	0
1000640	1	13.2922655715264	3	3	3	.164745676187324	3.09090909090909	3.875	2.27777777777778	.62962962962963	.703703703703704	.407407407407407	.407407407407407	9	9	9	1	0
1000020	0	13.7659137577002	2	2	4	.173341851716421	4.09090909090909	3.75	4	.481481481481481	1.11111111111111	.538461538461538	.518518518518518	6	6	6	1	0
1015000	0	13.5222450376454	5	1	3	.173976739302039	3.45454545454545	4.75	1.11111111111111	.0740740740740741	.296296296296296	.37037037037037	.333333333333333	12	0	12	1	0
1012860	1	13.6208076659822	3	3	3	.175018159774092	4.27272727272727	4.5	2.83333333333333	.296296296296296	.740740740740741	1.07407407407407	.296296296296296	9	9	9	1	0
1015670	0	12.4106776180698	3	3	3	.175623504586044	3.72727272727273	2	3.33333333333333	.888888888888889	.481481481481481	.555555555555556	.518518518518518	9	9	9	1	0
1017010	0	99	3	3	3	.177374097970608	2.81818181818182	4.875	3.94444444444444	.740740740740741	.925925925925926	.851851851851852	.962962962962963	9	9	9	1	0
1002190	1	13.4592744695414	4	3	3	.184327089437678	4	4.125	2.72222222222222	.148148148148148	.0740740740740741	.185185185185185	.0769230769230769	12	9	12	1	0
1015700	0	14.9787816563997	2	3	4	.185947507538573	2.27272727272727	2.28571428571429	2.61111111111111	.962962962962963	.888888888888889	.518518518518518	.925925925925926	6	9	9	1	0
1016960	1	12.3696098562628	3	3	5	.187297857501933	3.63636363636364	3.875	2.22222222222222	.555555555555556	.407407407407407	.481481481481481	.666666666666667	9	9	9	1	0
1014680	0	13.1690622861054	3	3	3	.191841734645305	3.27272727272727	3	3	.111111111111111	.259259259259259	.259259259259259	.185185185185185	9	9	9	1	0
1004430	0	12.7036276522929	3	4	3	.192900356322868	3.27272727272727	3.875	2.27777777777778	.37037037037037	.333333333333333	99	99	9	12	12	1	0
1016570	0	12.3586584531143	2	2	5	.193383456456719	3.72727272727273	3.25	2.72222222222222	.259259259259259	.37037037037037	.37037037037037	.307692307692308	6	6	6	1	0
1003770	1	11.5619438740589	3	3	3	.194559884819	3.54545454545455	3.375	3.44444444444444	.518518518518518	.555555555555556	.555555555555556	.592592592592593	9	9	9	1	0
1000230	1	11.9507186858316	5	5	2	.19493174005411	3.09090909090909	3.5	2.05555555555556	.333333333333333	.62962962962963	.703703703703704	.62962962962963	12	12	12	1	0
1003060	0	14.4941820670773	5	3	3	.195818625558587	2.09090909090909	3.25	3.22222222222222	.259259259259259	.925925925925926	.444444444444444	1	12	9	12	1	0
1014120	1	99	3	3	3	.196944282169405	3.36363636363636	3.625	2.44444444444444	.814814814814815	.481481481481481	.481481481481481	.37037037037037	9	9	9	1	0
1002870	1	12.4298425735797	3	3	3	.198283209228513	3.36363636363636	3.5	1.55555555555556	.037037037037037	.0740740740740741	.407407407407407	.222222222222222	9	9	9	1	0
1003670	0	12.7994524298426	3	3	3	.19831334206788	3.54545454545455	3.5	3	.37037037037037	.259259259259259	.111111111111111	.148148148148148	9	9	9	1	0
1003480	0	12.5612594113621	3	99	3	.204157983787646	2.72727272727273	2.875	2.44444444444444	.888888888888889	1.18518518518519	99	.851851851851852	9	99	99	1	0
1000080	0	12.580424366872	2	2	4	.204585620415335	2.90909090909091	3	1.94444444444444	.444444444444444	.62962962962963	.692307692307692	.888888888888889	6	6	6	1	0
1001630	0	13.7385352498289	3	1	4	.208341846090354	3.45454545454545	2.875	2.11111111111111	.481481481481481	.592592592592593	.62962962962963	.653846153846154	9	0	9	1	0
1015110	0	12.7830253251198	3	2	4	.208723697429943	3.09090909090909	3.375	3.05555555555556	.444444444444444	.407407407407407	.62962962962963	.666666666666667	9	6	9	1	0
1000890	1	12.3175906913073	4	5	3	.208847388325667	3.36363636363636	2.375	2.33333333333333	.296296296296296	.481481481481481	.259259259259259	.222222222222222	12	12	12	1	0
1014000	0	13.5359342915811	3	3	4	.212384410056873	4.27272727272727	4.375	3.83333333333333	.407407407407407	.222222222222222	.444444444444444	.0740740740740741	9	9	9	1	0
1001120	0	14.8145106091718	3	2	3	.212756872813625	1.81818181818182	5	2.22222222222222	.777777777777778	.555555555555556	.259259259259259	.296296296296296	9	6	9	1	0
1015710	0	12.5831622176591	5	5	2	.214853603974101	3	3.125	3.11764705882353	.555555555555556	.592592592592593	.555555555555556	.307692307692308	12	12	12	1	0
1001400	1	13.2758384668036	2	2	3	.215462241550591	3.27272727272727	4.25	2.55555555555556	.185185185185185	.185185185185185	.037037037037037	0	6	6	6	1	0
1002140	0	13.0184804928131	3	2	4	.21753590988178	1.90909090909091	1.75	2.94444444444444	.555555555555556	.444444444444444	.259259259259259	.259259259259259	9	6	9	1	0
1014670	0	13.0513347022587	3	3	5	.21997840681132	4.18181818181818	3.5	3.61111111111111	.222222222222222	1.03846153846154	.777777777777778	.962962962962963	9	9	9	1	0
1016970	1	13.0376454483231	3	3	3	.220480407615583	3.54545454545455	4.125	1.5	.296296296296296	.444444444444444	.222222222222222	.481481481481481	9	9	9	1	0
1014800	1	12.5065023956194	3	5	3	.220700546651407	4.27272727272727	3.5	3	.259259259259259	.518518518518518	.703703703703704	.666666666666667	9	12	12	1	0
1015150	1	12.3504449007529	3	3	3	.221285201449202	3.90909090909091	4	2.44444444444444	.740740740740741	.740740740740741	1.2962962962963	.962962962962963	9	9	9	1	0
1001090	0	12.9089664613279	6	4	4	.221572058347101	4.36363636363636	4.875	2.55555555555556	.481481481481481	.407407407407407	.407407407407407	.444444444444444	15	12	15	1	0
1014640	0	13.2621492128679	3	3	4	.221778118555387	4.27272727272727	4.125	2.33333333333333	1	.814814814814815	.481481481481481	.925925925925926	9	9	9	1	0
1004510	1	13.2210814510609	3	3	4	.221902033269306	3.90909090909091	3.875	3	.0740740740740741	.185185185185185	.296296296296296	.111111111111111	9	9	9	1	0
1013460	0	12.8268309377139	4	3	3	.224557053212049	2.81818181818182	2.75	1.66666666666667	.444444444444444	.62962962962963	.444444444444444	99	12	9	12	1	0
1001910	1	12.8021902806297	4	4	3	.225189751374371	2.45454545454545	1.5	4.88888888888889	1	1.14814814814815	.962962962962963	1	12	12	12	1	0
1013140	0	13.6098562628337	3	3	3	.225563553991715	4.36363636363636	4.125	2.38888888888889	.259259259259259	.111111111111111	.333333333333333	.222222222222222	9	9	9	1	0
1000150	1	12.3860369609856	3	3	3	.229388765757288	4.45454545454545	4.875	2.16666666666667	0	.333333333333333	.111111111111111	.148148148148148	9	9	9	1	0
1000490	1	13.0349075975359	3	3	2	.230445086491258	4	3.5	2.55555555555556	.444444444444444	.666666666666667	.666666666666667	.333333333333333	9	9	9	1	0
1000850	1	13.1882272416153	3	3	4	.234720465310457	2.63636363636364	1.625	2.5	.962962962962963	.888888888888889	.703703703703704	.777777777777778	9	9	9	1	0
1015540	1	12.5995893223819	4	3	4	.237092124663928	3.72727272727273	3.75	2.77777777777778	.296296296296296	.222222222222222	.407407407407407	.296296296296296	12	9	12	1	0
1004070	0	13.5824777549624	2	1	4	.241315924730985	2.45454545454545	3.25	2.61111111111111	.333333333333333	.481481481481481	.5	.555555555555556	6	0	6	1	0
1013580	0	13.2101300479124	3	3	5	.243055085962233	4	4.375	2.22222222222222	.222222222222222	.592592592592593	.444444444444444	.259259259259259	9	9	9	1	0
1004690	0	12.5311430527036	5	5	3	.243645717048894	3.63636363636364	4	3.11111111111111	.555555555555556	.851851851851852	.888888888888889	99	12	12	12	1	0
1002220	0	13.5523613963039	3	3	3	.245574301686574	3.45454545454545	3.75	3	.851851851851852	.925925925925926	.666666666666667	.518518518518518	9	9	9	1	0
1000840	1	12.9281314168378	3	3	4	.248758867745848	4.09090909090909	5	3.55555555555556	.259259259259259	.444444444444444	.592592592592593	.703703703703704	9	9	9	1	0
1003010	0	12.6461327857632	3	2	3	.249360998189533	3.90909090909091	1.25	2.72222222222222	.37037037037037	.518518518518518	.925925925925926	.851851851851852	9	6	9	1	0
1003540	0	12.952772073922	3	2	3	.253557408736586	3	3.375	2.11111111111111	.333333333333333	.37037037037037	.296296296296296	.37037037037037	9	6	9	1	0
1004220	1	12.4900752908966	3	3	3	.256156103330827	2.36363636363636	3	2.22222222222222	.592592592592593	.333333333333333	.518518518518518	.333333333333333	9	9	9	1	0
1004410	0	13.0458590006845	3	3	2	.2570901049107	2.81818181818182	3	2.55555555555556	.703703703703704	.653846153846154	.481481481481481	.481481481481481	9	9	9	1	0
1014720	1	13.7549623545517	2	1	3	.268021091291349	3.27272727272727	4.125	2.44444444444444	.0740740740740741	.37037037037037	.222222222222222	.148148148148148	6	0	6	1	0
1001890	0	12.6379192334018	2	3	2	.269138571548732	2.90909090909091	2.75	4.66666666666667	.62962962962963	.148148148148148	.37037037037037	.37037037037037	6	9	9	1	0
1015130	0	13.1581108829569	3	3	3	.269555682920024	4.18181818181818	4.625	2.94444444444444	.407407407407407	.518518518518518	.37037037037037	.592592592592593	9	9	9	1	0
1004530	0	12.7173169062286	4	4	3	.270054214639074	3	3.25	2.61111111111111	.555555555555556	.333333333333333	.222222222222222	.259259259259259	12	12	12	1	0
1000680	1	12.331279945243	3	3	3	.270501441478731	1.72727272727273	4.375	1.38888888888889	1	.037037037037037	.481481481481481	.703703703703704	9	9	9	1	0
1003930	1	12.5585215605749	3	3	3	.271378319893073	3.45454545454545	3.375	4.11111111111111	.518518518518518	.518518518518518	.555555555555556	.703703703703704	9	9	9	1	0
1013770	1	99	3	3	4	.274433424632443	3.18181818181818	3.125	3.11111111111111	.666666666666667	.518518518518518	.407407407407407	.444444444444444	9	9	9	1	0
1001510	0	14.3107460643395	5	5	4	.275114859642037	2.27272727272727	3.28571428571429	2.11111111111111	.222222222222222	.37037037037037	.777777777777778	.37037037037037	12	12	12	1	0
1001650	0	12.3066392881588	5	5	3	.275413902687784	4.36363636363636	3.375	3.11111111111111	.37037037037037	.481481481481481	.269230769230769	.222222222222222	12	12	12	1	0
1002840	1	13.0650239561944	3	3	3	.277213992508432	2.45454545454545	2.5	2.94444444444444	.666666666666667	.740740740740741	.925925925925926	.62962962962963	9	9	9	1	0
1013050	0	13.8480492813142	3	3	3	.278639316202575	3	2.25	3.44444444444444	.333333333333333	.444444444444444	.518518518518518	.518518518518518	9	9	9	1	0
1003900	0	13.1033538672142	3	3	3	.280528302026143	2.18181818181818	2	4.5	.814814814814815	.703703703703704	99	.851851851851852	9	9	9	1	0
1001190	0	12.5119780971937	3	3	4	.28054331776358	2	2	3.33333333333333	.444444444444444	.148148148148148	.259259259259259	.555555555555556	9	9	9	1	0
1016540	0	11.0362765229295	3	3	3	.282901460975416	2.18181818181818	2.5	2.38888888888889	.851851851851852	.888888888888889	1	1.22222222222222	9	9	9	1	0
1015170	0	14.2422997946612	3	2	4	.283358962086122	3.81818181818182	3.25	2.5	.444444444444444	.555555555555556	.703703703703704	.888888888888889	9	6	9	1	0
1000870	0	12.6406570841889	3	3	4	.284552756072541	3.63636363636364	3.25	3	.888888888888889	1.38461538461538	.962962962962963	1.38461538461538	9	9	9	1	0
1014710	1	13.0020533880903	3	3	5	.285244923207822	3.72727272727273	3.25	1.94444444444444	.444444444444444	.407407407407407	.407407407407407	.259259259259259	9	9	9	1	0
1000160	1	13.201916495551	3	3	3	.286657677400238	2.63636363636364	3	2.38888888888889	.814814814814815	.962962962962963	.555555555555556	.259259259259259	9	9	9	1	0
1016950	0	12.7638603696099	3	4	4	.287071175262086	3.72727272727273	3.5	2.88888888888889	0	.333333333333333	.730769230769231	.925925925925926	9	12	12	1	0
1016090	1	12.2354551676934	3	3	3	.294051092576017	3.09090909090909	1.42857142857143	4.11111111111111	.37037037037037	.259259259259259	.481481481481481	.37037037037037	9	9	9	1	0
1000540	0	12.4791238877481	3	3	4	.297321647080678	2.18181818181818	1.375	2.83333333333333	1.07407407407407	.814814814814815	.777777777777778	.333333333333333	9	9	9	1	0
1000910	1	12.5667351129363	3	3	4	.302762667825665	3.45454545454545	3.625	1.44444444444444	.518518518518518	.407407407407407	.407407407407407	.296296296296296	9	9	9	1	0
1000280	1	12.6789869952088	3	2	3	.302792409273251	2.45454545454545	2.5	2.44444444444444	.777777777777778	.814814814814815	.777777777777778	.962962962962963	9	6	9	1	0
1002120	1	12.766598220397	5	3	3	.304640195241	2.90909090909091	3.625	2.61111111111111	.555555555555556	.407407407407407	.185185185185185	.555555555555556	12	9	12	1	0
1012830	0	12.4024640657084	3	3	4	.307557165740606	3.27272727272727	3.375	1.77777777777778	.333333333333333	.148148148148148	.0740740740740741	.037037037037037	9	9	9	1	0
1001200	1	14.6228610540726	3	3	3	.308328613136654	3.45454545454545	3.75	2.94444444444444	.111111111111111	.296296296296296	.444444444444444	.407407407407407	9	9	9	1	0
1002680	0	14.0561259411362	3	3	3	.309830249390166	3.63636363636364	2.14285714285714	2.88888888888889	.518518518518518	1.2962962962963	.703703703703704	.925925925925926	9	9	9	1	0
1001440	1	12.8542094455852	3	3	3	.309911558995414	3.27272727272727	4.125	3.5	.148148148148148	.222222222222222	.153846153846154	.148148148148148	9	9	9	1	0
1001390	1	12.8596851471595	3	2	5	.313466167608533	3.36363636363636	4.5	1.77777777777778	.703703703703704	.592592592592593	.62962962962963	.296296296296296	9	6	9	1	0
1002150	0	13.2265571526352	2	3	3	.314027100525503	3.72727272727273	4.25	1.83333333333333	1.14814814814815	.62962962962963	.555555555555556	.0769230769230769	6	9	9	1	0
1015590	1	12.3887748117728	3	3	4	.314311996189602	4.18181818181818	4.625	1.5	.407407407407407	.259259259259259	.259259259259259	.333333333333333	9	9	9	1	0
1016110	1	12.0711841204654	3	3	3	.317348884740933	2.81818181818182	1.75	3.44444444444444	.555555555555556	.555555555555556	.740740740740741	.777777777777778	9	9	9	1	0
1012850	0	13.3990417522245	3	3	3	.326421303161862	5	5	3.66666666666667	.0740740740740741	.222222222222222	0	.0740740740740741	9	9	9	1	0
1015630	0	12.7611225188227	5	2	4	.327143128631827	3.09090909090909	3.375	2.33333333333333	.851851851851852	.888888888888889	.851851851851852	.518518518518518	12	6	12	1	0
1003630	0	14.4640657084189	3	3	3	.327926068491126	3.18181818181818	3.125	2.94444444444444	.518518518518518	.851851851851852	.444444444444444	.555555555555556	9	9	9	1	0
1014220	0	13.4811772758385	5	3	3	.327960513888961	4.81818181818182	4	2.66666666666667	.333333333333333	.518518518518518	.592592592592593	.37037037037037	12	9	12	1	0
1000860	0	13.223819301848	5	3	3	.33044127902548	3	2.875	2.88888888888889	.814814814814815	.962962962962963	.444444444444444	.666666666666667	12	9	12	1	0
1003450	0	99	3	2	5	.330507205695269	1.72727272727273	1	2.77777777777778	.62962962962963	.555555555555556	.555555555555556	1	9	6	9	1	0
1013500	0	13.6591375770021	3	3	3	.330772345967235	4.18181818181818	4.75	3.16666666666667	0	0	.0769230769230769	.111111111111111	9	9	9	1	0
1016650	1	13.7385352498289	3	5	5	.33302546891839	3.45454545454545	3.5	2.33333333333333	.666666666666667	.703703703703704	.148148148148148	.37037037037037	9	12	12	1	0
1013440	0	14.1300479123888	3	2	3	.344331301405963	3	3.625	2.88888888888889	.592592592592593	.259259259259259	.259259259259259	.444444444444444	9	6	9	1	0
1016120	0	12.8459958932238	3	3	3	.349519205721962	2.72727272727273	3.125	2.11111111111111	.333333333333333	.666666666666667	.740740740740741	.518518518518518	9	9	9	1	0
1014750	1	12.8624229979466	3	3	4	.351984870370722	3.18181818181818	3	2.44444444444444	.333333333333333	.111111111111111	1	.037037037037037	9	9	9	1	0
1013280	1	13.1225188227242	3	3	4	.354514385125897	2.45454545454545	3.375	1.44444444444444	.962962962962963	.62962962962963	.481481481481481	.37037037037037	9	9	9	1	0
1013640	1	12.5530458590007	3	3	3	.355214204528325	4	3.375	2.33333333333333	.222222222222222	.518518518518518	.592592592592593	.703703703703704	9	9	9	1	0
1014230	1	12.4462696783025	3	3	3	.355784963051908	3	2.375	2.88888888888889	.925925925925926	.592592592592593	.666666666666667	.259259259259259	9	9	9	1	0
1014280	0	12.6817248459959	3	3	3	.356341950347319	3.09090909090909	2.875	3	.333333333333333	.407407407407407	.481481481481481	.703703703703704	9	9	9	1	0
1003570	1	13.0458590006845	3	3	3	.365772947694595	3	3	2.38888888888889	.777777777777778	1.2962962962963	.851851851851852	.777777777777778	9	9	9	1	0
1002340	0	12.7775496235455	6	4	3	.365914633576491	3.45454545454545	3.25	1.77777777777778	.481481481481481	.333333333333333	.148148148148148	.259259259259259	15	12	15	1	0
1004330	1	99	2	1	3	.374344992709692	3.18181818181818	2.25	2.55555555555556	.5	.444444444444444	.269230769230769	.666666666666667	6	0	6	1	0
1014940	0	13.0239561943874	5	3	3	.380918886821472	3.81818181818182	4.5	1.94444444444444	.259259259259259	.148148148148148	.148148148148148	.222222222222222	12	9	12	1	0
1001520	0	99	2	2	4	.38454885958267	3.18181818181818	3.75	2.44444444444444	.333333333333333	.111111111111111	.0740740740740741	.148148148148148	6	6	6	1	0
1003250	1	12.1013004791239	3	3	4	.386275147315529	2.18181818181818	2.375	2.72222222222222	.740740740740741	.592592592592593	.259259259259259	.333333333333333	9	9	9	1	0
1013130	0	12.8049281314168	2	3	4	.387904388984397	3.81818181818182	3.75	2.5	.259259259259259	.185185185185185	.62962962962963	.703703703703704	6	9	9	1	0
1000630	1	13.2539356605065	2	2	3	.3893188498754	3.36363636363636	4.125	2.27777777777778	.444444444444444	.148148148148148	.185185185185185	.037037037037037	6	6	6	1	0
1003600	1	12.4873374401095	5	3	4	.389539876424287	3.18181818181818	2.75	2.5	.518518518518518	.666666666666667	.777777777777778	1.18518518518519	12	9	12	1	0
1016720	1	12.2765229295003	3	3	3	.389800213128552	4	4.375	3.05555555555556	.518518518518518	.481481481481481	.518518518518518	.740740740740741	9	9	9	1	0
1004060	1	12.8158795345654	3	3	3	.389820186412523	4.63636363636364	5	2.44444444444444	.481481481481481	1	.703703703703704	.666666666666667	9	9	9	1	0
1012570	1	12.9390828199863	5	5	3	.390965699423564	4.72727272727273	4.625	2.55555555555556	.148148148148148	0	.037037037037037	.115384615384615	12	12	12	1	0
1000270	1	13.4318959616701	4	4	3	.393837519697693	3.36363636363636	4.25	3.72222222222222	.555555555555556	.0740740740740741	1	.62962962962963	12	12	12	1	0
1002100	1	12.9199178644764	3	2	3	.394954692835667	3.90909090909091	5	1.77777777777778	.444444444444444	.444444444444444	.148148148148148	.0740740740740741	9	6	9	1	0
1003590	1	12.6981519507187	3	3	3	.398455916333864	3.63636363636364	2.75	2.72222222222222	1.03703703703704	.555555555555556	.851851851851852	.740740740740741	9	9	9	1	0
1017160	0	13.3634496919918	3	3	3	.399473521999446	3.27272727272727	3.875	2	.0740740740740741	.333333333333333	.259259259259259	.259259259259259	9	9	9	1	0
1012930	1	13.9137577002053	7	3	4	.400373025991346	3.18181818181818	3.875	3	.518518518518518	.37037037037037	.111111111111111	.296296296296296	16	9	16	1	0
1002390	1	12.5913757700205	3	3	3	.40138384310701	3.63636363636364	3.25	2.33333333333333	.222222222222222	.407407407407407	.592592592592593	.518518518518518	9	9	9	1	0
1014010	1	12.7392197125257	3	3	3	.402609444945247	3.27272727272727	3.75	3.16666666666667	.307692307692308	.703703703703704	.518518518518518	.518518518518518	9	9	9	1	0
1016130	1	13.1827515400411	3	5	3	.403729652717113	3.45454545454545	2.75	2.16666666666667	.592592592592593	.703703703703704	.851851851851852	.925925925925926	9	12	12	1	0
1015790	1	12.6543463381246	5	3	3	.405076426793717	3.54545454545455	4.125	1.33333333333333	.407407407407407	.666666666666667	.740740740740741	.740740740740741	12	9	12	1	0
1000470	0	12.7446954140999	2	2	4	.407472844103571	2.09090909090909	3.625	3.11111111111111	.444444444444444	.884615384615385	99	99	6	6	6	1	0
1003940	1	12.4873374401095	3	3	2	.407887593841194	4.27272727272727	4.5	2.11111111111111	.185185185185185	.296296296296296	.185185185185185	.333333333333333	9	9	9	1	0
1012650	0	12.7802874743326	3	3	4	.409436925950277	3.18181818181818	3.25	3.83333333333333	.111111111111111	.333333333333333	.185185185185185	.148148148148148	9	9	9	1	0
1002900	0	12.662559890486	3	2	5	.410244290590672	3.09090909090909	3.625	2.11111111111111	.296296296296296	.555555555555556	.37037037037037	.518518518518518	9	6	9	1	0
1016580	1	13.223819301848	3	3	2	.413147463102082	3.36363636363636	2.375	3	.037037037037037	.185185185185185	99	99	9	9	9	1	0
1014350	0	12.6242299794661	3	3	4	.419136200565547	3.63636363636364	3.25	1.38888888888889	.222222222222222	.777777777777778	.666666666666667	.518518518518518	9	9	9	1	0
1012800	1	13.0540725530459	3	4	3	.419232104457796	2.81818181818182	4.5	1.16666666666667	.407407407407407	.481481481481481	.62962962962963	.518518518518518	9	12	12	1	0
1014150	1	13.1663244353183	2	3	3	.419993633470249	1	2	2.66666666666667	.296296296296296	.692307692307692	.222222222222222	.407407407407407	6	9	9	1	0
1001660	0	12.4024640657084	7	3	4	.422184350013789	2.45454545454545	1.375	3.83333333333333	.407407407407407	.148148148148148	.518518518518518	.740740740740741	16	9	16	1	0
1016070	1	12.8678986995209	2	2	3	.423150966061217	1.72727272727273	3.125	1.88235294117647	.592592592592593	.592592592592593	.407407407407407	.333333333333333	6	6	6	1	0
1003690	1	13.3114305270363	3	3	3	.423277912669596	1.63636363636364	2	3.22222222222222	1.14814814814815	.814814814814815	.777777777777778	.814814814814815	9	9	9	1	0
1002210	1	13.4209445585216	3	3	3	.430686223672311	3.09090909090909	2.75	3.94444444444444	.518518518518518	.518518518518518	.407407407407407	.592592592592593	9	9	9	1	0
1014250	0	12.848733744011	3	3	3	.431803185099267	3.72727272727273	4.625	1.83333333333333	.481481481481481	.925925925925926	.962962962962963	1.18518518518519	9	9	9	1	0
1014310	1	12.9199178644764	2	4	4	.432676858088832	3.72727272727273	3	2.38888888888889	.555555555555556	.407407407407407	.481481481481481	.259259259259259	6	12	12	1	0
1013020	0	12.498288843258	3	2	5	.436818609573268	4.27272727272727	4.625	2.38888888888889	.296296296296296	.333333333333333	.407407407407407	.185185185185185	9	6	9	1	0
1004050	0	13.015742642026	3	2	5	.44174095258339	2.18181818181818	2.875	1.72222222222222	.37037037037037	.0740740740740741	.296296296296296	.148148148148148	9	6	9	1	0
1013600	0	13.3771389459274	3	3	3	.443008310116375	3.27272727272727	3	2.94444444444444	1.11111111111111	.518518518518518	.962962962962963	.851851851851852	9	9	9	1	0
1002640	0	12.6078028747433	2	5	3	.443212984253323	2.90909090909091	3.375	3.22222222222222	.62962962962963	.518518518518518	.259259259259259	.592592592592593	6	12	12	1	0
1013590	0	12.7063655030801	3	3	4	.443286556997524	2.36363636363636	3.625	2	.851851851851852	.666666666666667	.740740740740741	.740740740740741	9	9	9	1	0
1003580	1	13.7330595482546	3	3	3	.445168306617415	2.45454545454545	4.625	2.11111111111111	.407407407407407	.222222222222222	.444444444444444	.444444444444444	9	9	9	1	0
1003550	1	12.8980150581793	3	3	4	.446656999496416	3.45454545454545	3.875	2.11111111111111	.555555555555556	.777777777777778	.703703703703704	.925925925925926	9	9	9	1	0
1013070	0	13.2676249144422	2	2	3	.446691160828562	1.27272727272727	4	2.88888888888889	.666666666666667	.703703703703704	.37037037037037	.518518518518518	6	6	6	1	0
1016800	1	12.3011635865845	5	3	3	.447182884744531	3.54545454545455	4.25	2.38888888888889	.037037037037037	.296296296296296	.111111111111111	.407407407407407	12	9	12	1	0
1000310	1	12.2847364818617	5	4	3	.451144980833135	4.36363636363636	2.75	3	.185185185185185	.222222222222222	.296296296296296	.148148148148148	12	12	12	1	0
1002160	0	13.0321697467488	3	3	3	.45159358137309	3.63636363636364	4.25	2.05555555555556	.259259259259259	.296296296296296	.037037037037037	.481481481481481	9	9	9	1	0
1015530	0	12.249144421629	5	3	3	.452701414806342	3.45454545454545	3.75	2.66666666666667	.37037037037037	.925925925925926	.740740740740741	1	12	9	12	1	0
1003990	1	12.5229295003422	3	3	3	.454107336236998	4.54545454545455	4	2.44444444444444	.37037037037037	.148148148148148	99	.592592592592593	9	9	9	1	0
1013110	0	12.5831622176591	3	3	3	.454473810076787	2.36363636363636	2.75	3.5	1.11538461538462	.962962962962963	.703703703703704	.37037037037037	9	9	9	1	0
1004540	1	12.9472963723477	3	4	3	.455819177701905	4.27272727272727	4.125	2.88888888888889	.185185185185185	.407407407407407	.666666666666667	.555555555555556	9	12	12	1	0
1000620	0	13.3442847364819	3	3	3	.455950652218876	2.72727272727273	3.5	3.38888888888889	.555555555555556	99	99	99	9	9	9	1	0
1001020	1	99	3	3	4	.45600358967811	3.54545454545455	2.125	2.11111111111111	.259259259259259	.555555555555556	.740740740740741	.740740740740741	9	9	9	1	0
1002620	0	13.864476386037	3	1	3	.457974238056621	3	4	3.22222222222222	.259259259259259	.185185185185185	.444444444444444	.481481481481481	9	0	9	1	0
1000300	0	12.7720739219713	3	2	3	.460879769412443	3.72727272727273	4.375	3.66666666666667	0	.222222222222222	.518518518518518	.333333333333333	9	6	9	1	0
1014240	1	13.07871321013	3	3	3	.462488491582674	2.81818181818182	3.5	2.94444444444444	.740740740740741	.888888888888889	.777777777777778	.888888888888889	9	9	9	1	0
1002510	1	12.5256673511294	3	3	3	.462659829245555	1.63636363636364	2	2.22222222222222	.296296296296296	.666666666666667	.576923076923077	.407407407407407	9	9	9	1	0
1012770	1	13.3798767967146	3	3	3	.463672248156559	3.72727272727273	4	2.11111111111111	.0740740740740741	.037037037037037	.0384615384615385	0	9	9	9	1	0
1001940	0	13.5496235455168	3	5	3	.464461057502566	3.18181818181818	2	4.5	.666666666666667	.925925925925926	.666666666666667	.925925925925926	9	12	12	1	0
1001070	0	12.1232032854209	2	2	3	.46616341924498	2.90909090909091	3.5	4	.037037037037037	.259259259259259	.407407407407407	.481481481481481	6	6	6	1	0
1013300	1	12.4298425735797	3	3	3	.466394252562381	3.45454545454545	3.375	2.72222222222222	.333333333333333	.222222222222222	.555555555555556	.481481481481481	9	9	9	1	0
1016700	1	12.1478439425051	3	3	4	.467524844305476	3.54545454545455	4.375	1.88888888888889	.259259259259259	.259259259259259	.0740740740740741	.222222222222222	9	9	9	1	0
1015300	0	12.6269678302533	3	3	4	.469342583159443	4.09090909090909	5	3.27777777777778	.296296296296296	.185185185185185	.185185185185185	.148148148148148	9	9	9	1	0
1000250	0	12.8788501026694	3	3	4	.469486869840464	2.72727272727273	4	3.88235294117647	.666666666666667	.481481481481481	.333333333333333	.592592592592593	9	9	9	1	0
1000720	0	12.6023271731691	3	3	3	.470324099496968	3.27272727272727	3.75	2.55555555555556	.703703703703704	.555555555555556	.851851851851852	.481481481481481	9	9	9	1	0
1001680	1	12.9007529089665	3	6	3	.471722706220918	3.63636363636364	3.875	2.5	.814814814814815	.62962962962963	1.25925925925926	.62962962962963	9	15	15	1	0
1013380	1	12.1505817932923	2	3	3	.473570921328328	2.63636363636364	2.375	2.5	.62962962962963	.740740740740741	.703703703703704	.518518518518518	6	9	9	1	0
1002330	1	12.290212183436	3	3	2	.474805481652023	2.45454545454545	4.5	2	.333333333333333	.111111111111111	.296296296296296	.222222222222222	9	9	9	1	0
1016160	1	13.4428473648186	3	1	4	.475690717843088	3.54545454545455	3.375	2.11111111111111	.296296296296296	.851851851851852	1	.444444444444444	9	0	9	1	0
1017130	0	12.5913757700205	3	3	3	.475693614824536	2.27272727272727	2.125	2.61111111111111	.814814814814815	1.07407407407407	99	1.14814814814815	9	9	9	1	0
1016040	0	12.9993155373032	3	3	5	.482364663432506	2.27272727272727	2.5	1.77777777777778	.185185185185185	.185185185185185	.148148148148148	.259259259259259	9	9	9	1	0
1000290	1	99	3	3	2	.484763515494051	3.36363636363636	3.5	4.61111111111111	.333333333333333	.592592592592593	.0740740740740741	.222222222222222	9	9	9	1	0
1003800	0	14.2669404517454	3	1	3	.485143022877438	2.72727272727273	4.5	4.66666666666667	.962962962962963	.740740740740741	.296296296296296	.296296296296296	9	0	9	1	0
1001710	0	13.0403832991102	3	3	3	.486361732408974	3.09090909090909	3	2.33333333333333	.62962962962963	.555555555555556	.653846153846154	.925925925925926	9	9	9	1	0
1003810	1	12.9801505817933	5	5	3	.493832744986213	3.63636363636364	3.5	2.16666666666667	.259259259259259	.407407407407407	.37037037037037	.481481481481481	12	12	12	1	0
1002910	1	12.7967145790554	3	3	3	.494019082756807	3.45454545454545	4.5	1.94444444444444	.37037037037037	.333333333333333	.296296296296296	.148148148148148	9	9	9	1	0
1001210	1	13.2347707049966	3	2	3	.495516283670734	3	3.5	3.66666666666667	.185185185185185	.185185185185185	.185185185185185	.148148148148148	9	6	9	1	0
1016140	1	12.829568788501	3	3	3	.496112123425181	4.09090909090909	4	2.77777777777778	.518518518518518	.888888888888889	.814814814814815	1.07407407407407	9	9	9	1	0
1013550	0	12.8733744010951	3	3	4	.49860913139548	3.36363636363636	3.25	2.33333333333333	.259259259259259	.296296296296296	.185185185185185	.259259259259259	9	9	9	1	0
1002020	0	12.8870636550308	3	3	4	.499723980322015	2.45454545454545	2.875	2.38888888888889	.518518518518518	.62962962962963	.296296296296296	.518518518518518	9	9	9	1	0
1012510	1	12.5147159479808	3	2	3	.502799350663973	3	3.625	3.61111111111111	.37037037037037	.37037037037037	.296296296296296	.296296296296296	9	6	9	1	0
1004090	1	12.9062286105407	3	5	3	.504560034255826	3.54545454545455	3.625	1.61111111111111	.333333333333333	.407407407407407	.259259259259259	.259259259259259	9	12	12	1	0
1001730	1	13.2922655715264	3	3	2	.505415205261057	3.72727272727273	4.125	1.72222222222222	.037037037037037	.333333333333333	.0740740740740741	.407407407407407	9	9	9	1	0
1002130	1	13.7330595482546	2	3	3	.5113909706845	2.90909090909091	3.25	2	.481481481481481	.666666666666667	.37037037037037	.592592592592593	6	9	9	1	0
1003490	0	13.015742642026	3	3	4	.512139296550227	3.54545454545455	3.875	3.55555555555556	.153846153846154	.259259259259259	.481481481481481	.148148148148148	9	9	9	1	0
1012720	0	12.3039014373717	3	3	4	.515436808070889	3.54545454545455	3	2.44444444444444	.259259259259259	.37037037037037	.222222222222222	.296296296296296	9	9	9	1	0
1014630	1	12.8870636550308	3	4	3	.516436767588295	2	2.125	1.22222222222222	.555555555555556	.333333333333333	.666666666666667	.481481481481481	9	12	12	1	0
1001670	1	12.5886379192334	5	3	4	.518708634495429	3.90909090909091	3.25	2.33333333333333	.740740740740741	.518518518518518	.555555555555556	.444444444444444	12	9	12	1	0
1014660	1	13.264887063655	3	3	5	.519244541323566	2.09090909090909	4.75	3	.259259259259259	.296296296296296	.259259259259259	.222222222222222	9	9	9	1	0
1003300	1	12.9062286105407	3	3	3	.520324692209983	3.81818181818182	4.625	2.55555555555556	.703703703703704	.851851851851852	.666666666666667	.666666666666667	9	9	9	1	0
1000480	1	12.6023271731691	4	2	3	.523284179821532	3.09090909090909	1.57142857142857	4.22222222222222	.814814814814815	.148148148148148	1.18518518518519	1.03703703703704	12	6	12	1	0
1015660	1	99	3	1	4	.523540740881618	3	4.5	2.16666666666667	.888888888888889	.814814814814815	.925925925925926	.62962962962963	9	0	9	1	0
1002890	1	12.6926762491444	3	2	5	.524167961296714	2.54545454545455	1.5	4.61111111111111	.62962962962963	.925925925925926	.555555555555556	1.14814814814815	9	6	9	1	0
1002110	0	13.3169062286105	3	3	3	.525584063625488	3.81818181818182	4.375	2.88888888888889	.185185185185185	.259259259259259	.148148148148148	.0740740740740741	9	9	9	1	0
1016640	0	12.829568788501	3	3	3	.525736250104269	2.81818181818182	2.5	2.61111111111111	.222222222222222	.296296296296296	.407407407407407	.666666666666667	9	9	9	1	0
1013230	1	12.5475701574264	4	4	3	.527416290263923	2.90909090909091	3.625	2.38888888888889	.259259259259259	.222222222222222	.296296296296296	.111111111111111	12	12	12	1	0
1016670	1	12.870636550308	3	3	2	.532539164145511	2.36363636363636	2.875	2.44444444444444	.592592592592593	.666666666666667	.518518518518518	1.03703703703704	9	9	9	1	0
1000460	0	12.3011635865845	3	4	3	.53279893830464	3.81818181818182	4.875	2.38888888888889	.0740740740740741	.296296296296296	.851851851851852	.62962962962963	9	12	12	1	0
1016560	1	12.3696098562628	5	5	3	.536486486996316	4.09090909090909	4.25	1.77777777777778	.222222222222222	.148148148148148	.0740740740740741	0	12	12	12	1	0
1014200	1	13.574264202601	3	3	5	.538069445650353	2.45454545454545	3.875	2.22222222222222	.259259259259259	.925925925925926	1.25925925925926	.555555555555556	9	9	9	1	0
1003560	1	13.0485968514716	3	2	4	.543920165055803	3.72727272727273	3.375	2.33333333333333	.740740740740741	.814814814814815	1.25925925925926	1.14814814814815	9	6	9	1	0
1014740	1	12.37234770705	3	2	5	.543998685505618	4.18181818181818	4	3.33333333333333	.555555555555556	.407407407407407	.407407407407407	1.22222222222222	9	6	9	1	0
1013760	1	12.5229295003422	2	3	4	.550947246627886	3.18181818181818	3.25	2.44444444444444	.777777777777778	.555555555555556	.481481481481481	.296296296296296	6	9	9	1	0
1017170	1	13.1307323750856	2	2	3	.551863065772426	3.18181818181818	3.125	2.61111111111111	.296296296296296	.296296296296296	.407407407407407	.333333333333333	6	6	6	1	0
1004230	1	12.9472963723477	3	4	3	.552953648173241	4.81818181818182	4.625	1.55555555555556	.296296296296296	.444444444444444	.518518518518518	.703703703703704	9	12	12	1	0
1004030	1	12.8213552361396	5	3	3	.556223900349256	4.54545454545455	4.625	2.66666666666667	.666666666666667	.666666666666667	.666666666666667	.555555555555556	12	9	12	1	0
1012630	0	12.6132785763176	3	2	3	.559076247099491	2.81818181818182	3.75	2.5	.740740740740741	.407407407407407	.222222222222222	.592592592592593	9	6	9	1	0
1002180	1	13.0513347022587	3	2	3	.559620910840717	3.36363636363636	3.125	2.38888888888889	.407407407407407	.703703703703704	1.14814814814815	.888888888888889	9	6	9	1	0
1016610	1	12.6379192334018	3	3	4	.560975693030495	2.72727272727273	3	1.22222222222222	.222222222222222	.407407407407407	.444444444444444	.740740740740741	9	9	9	1	0
1014620	1	12.0958247775496	3	3	3	.565129052937652	3.09090909090909	1.625	2.66666666666667	.518518518518518	1	.481481481481481	.518518518518518	9	9	9	1	0
1002350	0	12.3559206023272	3	3	3	.566276849551558	4.54545454545455	3.75	2.61111111111111	.296296296296296	.259259259259259	.230769230769231	.148148148148148	9	9	9	1	0
1004080	0	13.0184804928131	5	2	3	.568583981087304	2.90909090909091	4.5	1.72222222222222	.259259259259259	99	.444444444444444	.185185185185185	12	6	12	1	0
1000690	1	99	5	3	3	.568714920910887	2.63636363636364	3.25	2.55555555555556	.407407407407407	.333333333333333	.333333333333333	.62962962962963	12	9	12	1	0
1017180	1	13.1553730321697	3	2	3	.571743164880216	3.63636363636364	3.875	2.16666666666667	.592592592592593	.777777777777778	.444444444444444	.518518518518518	9	6	9	1	0
1015650	1	12.3997262149213	3	4	3	.572866142655174	3.18181818181818	3.5	2.38888888888889	.407407407407407	.296296296296296	.222222222222222	.185185185185185	9	12	12	1	0
1013780	1	13.0075290896646	5	3	3	.577951097743421	3.54545454545455	3.75	2.22222222222222	0	.111111111111111	.148148148148148	.222222222222222	12	9	12	1	0
1000550	0	12.6351813826146	3	3	3	.578928326274039	2.81818181818182	3.875	3.22222222222222	.407407407407407	.37037037037037	.666666666666667	99	9	9	9	1	0
1004020	0	12.6078028747433	6	6	4	.579211889528588	3.36363636363636	3.5	2.61111111111111	1.11111111111111	.296296296296296	.0740740740740741	.0740740740740741	15	15	15	1	0
1004650	1	12.9774127310062	3	3	3	.57948573249919	3.18181818181818	4.5	1.38888888888889	.296296296296296	.111111111111111	.222222222222222	.222222222222222	9	9	9	1	0
1001690	0	12.8158795345654	4	3	3	.580634879451523	3.27272727272727	3.25	3.61111111111111	.666666666666667	.518518518518518	.592592592592593	.518518518518518	12	9	12	1	0
1002490	0	13.5441478439425	3	2	3	.582392700834929	3.63636363636364	2.625	3.22222222222222	.37037037037037	.703703703703704	.62962962962963	.333333333333333	9	6	9	1	0
1014170	1	13.2621492128679	3	5	5	.585503418853387	3.81818181818182	3.5	2.27777777777778	.592592592592593	.777777777777778	.592592592592593	.592592592592593	9	12	12	1	0
1002700	0	12.7392197125257	3	3	4	.58714514002133	3.81818181818182	4.625	2.16666666666667	.111111111111111	.148148148148148	.037037037037037	.0740740740740741	9	9	9	1	0
1000170	1	13.6865160848734	3	3	3	.590499658597971	1.54545454545455	2.125	2.94444444444444	1.22222222222222	1.14814814814815	1.55555555555556	1.59259259259259	9	9	9	1	0
1012610	0	13.7357973990418	5	2	3	.605152222493659	3.81818181818182	3.75	2.44444444444444	.111111111111111	.0769230769230769	0	.148148148148148	12	6	12	1	0
1001410	0	12.498288843258	3	3	4	.606668649465963	3	3.25	2.16666666666667	.444444444444444	.62962962962963	.481481481481481	.592592592592593	9	9	9	1	0
1002410	0	13.0349075975359	3	2	3	.612168054719032	1.54545454545455	1.5	3.55555555555556	1.40740740740741	1.07407407407407	1.03703703703704	.777777777777778	9	6	9	1	0
1002690	0	13.3004791238877	3	3	2	.613852936327887	4	4.25	2	.037037037037037	.037037037037037	.0740740740740741	.148148148148148	9	9	9	1	0
1016590	0	12.4052019164956	3	3	4	.62080573593596	3.36363636363636	3.5	3.55555555555556	.888888888888889	.62962962962963	.888888888888889	.814814814814815	9	9	9	1	0
1000190	1	13.0239561943874	2	3	3	.622469879909377	2.45454545454545	3.5	4	.222222222222222	.851851851851852	99	99	6	9	9	1	0
1017150	0	13.5195071868583	5	5	2	.627379129364582	2.72727272727273	3.375	2.05555555555556	.703703703703704	1.14814814814815	1.12	1	12	12	12	1	0
1004470	0	99	5	3	3	.62868332334255	3.72727272727273	3.5	2.88888888888889	.444444444444444	.666666666666667	.148148148148148	.296296296296296	12	9	12	1	0
1016740	1	12.3258042436687	3	5	3	.634026546051293	3.63636363636364	2.875	3.55555555555556	.518518518518518	.692307692307692	.925925925925926	1.33333333333333	9	12	12	1	0
1012600	0	12.5530458590007	3	5	5	.639748577876043	3.09090909090909	1.875	2.05555555555556	.925925925925926	.777777777777778	.962962962962963	.592592592592593	9	12	12	1	0
1015250	1	12.3668720054757	2	2	3	.642306289641257	4.54545454545455	4.375	2.66666666666667	.111111111111111	.111111111111111	.111111111111111	.222222222222222	6	6	6	1	0
1003700	1	12.8542094455852	3	3	3	.643867802919095	3.81818181818182	2.75	3.44444444444444	.555555555555556	.444444444444444	.444444444444444	.37037037037037	9	9	9	1	0
1003870	0	12.4161533196441	3	3	4	.643915483077024	2.72727272727273	2.5	2.94444444444444	.296296296296296	.111111111111111	.296296296296296	.37037037037037	9	9	9	1	0
1016180	0	13.0075290896646	2	2	3	.646634429992457	3.54545454545455	4.5	2.5	.592592592592593	.296296296296296	.888888888888889	.777777777777778	6	6	6	1	0
1017190	0	12.4243668720055	5	5	4	.646869428794394	3.81818181818182	4.875	2.22222222222222	.481481481481481	.703703703703704	.333333333333333	.777777777777778	12	12	12	1	0
1000110	0	12.8651608487337	2	6	4	.647770544854406	4.54545454545455	4.5	3.05555555555556	.222222222222222	.518518518518518	.333333333333333	.592592592592593	6	15	15	1	0
1017050	0	12.5420944558522	3	3	3	.64864052054139	3.45454545454545	4.5	3.05555555555556	.259259259259259	.296296296296296	.296296296296296	.666666666666667	9	9	9	1	0
1001160	0	12.5859000684463	2	2	3	.650032276068964	3.09090909090909	2.625	3.33333333333333	.407407407407407	.296296296296296	.222222222222222	.37037037037037	6	6	6	1	0
1015230	1	12.0246406570842	3	3	5	.650545195107371	4.45454545454545	4.75	3.05555555555556	.111111111111111	.407407407407407	.333333333333333	.333333333333333	9	9	9	1	0
1016270	1	12.4517453798768	2	3	3	.651860917988519	3.09090909090909	3.75	1.77777777777778	.259259259259259	.296296296296296	.222222222222222	.222222222222222	6	9	9	1	0
1017120	1	13.6454483230664	3	2	3	.657587850891005	3.27272727272727	3.5	2.27777777777778	.111111111111111	.037037037037037	.148148148148148	.0740740740740741	9	6	9	1	0
1002070	1	14.1820670773443	5	2	4	.659872588115406	3.09090909090909	3.875	1.16666666666667	.185185185185185	.259259259259259	.148148148148148	.185185185185185	12	6	12	1	0
1003970	1	12.2792607802875	3	3	3	.661708143877132	5	5	1.33333333333333	.518518518518518	.518518518518518	1.11111111111111	.565217391304348	9	9	9	1	0
1001180	0	13.3497604380561	3	2	3	.661898149567935	2.90909090909091	2.5	1.94444444444444	.185185185185185	.037037037037037	.185185185185185	.148148148148148	9	6	9	1	0
1002590	0	13.1526351813826	3	1	3	.662700765386172	3.81818181818182	4	2.83333333333333	.0740740740740741	.0740740740740741	0	0	9	0	9	1	0
1002710	1	12.2819986310746	2	2	3	.665215300393202	1.90909090909091	2.625	1.66666666666667	.851851851851852	.62962962962963	.592592592592593	1.07407407407407	6	6	6	1	0
1012790	0	13.8042436687201	3	5	3	.6677141359393	4.09090909090909	5	2.22222222222222	.222222222222222	.037037037037037	0	.0740740740740741	9	12	12	1	0
1001430	0	12.7611225188227	3	3	3	.670992736200334	3.81818181818182	4.5	2.61111111111111	.185185185185185	.111111111111111	.333333333333333	.37037037037037	9	9	9	1	0
1016660	1	13.3771389459274	3	3	3	.674529687457124	2.54545454545455	3.25	2.5	.111111111111111	.148148148148148	.148148148148148	.518518518518518	9	9	9	1	0
1001930	1	12.9856262833676	3	3	3	.675121242008928	4.27272727272727	3.5	3.11111111111111	.555555555555556	1	.62962962962963	.518518518518518	9	9	9	1	0
1016490	0	99	3	3	4	.676007221825723	3.27272727272727	3.5	2.27777777777778	.444444444444444	.518518518518518	.444444444444444	.592592592592593	9	9	9	1	0
1000090	1	13.3086926762491	6	5	3	.677001064906395	4.09090909090909	4.25	2.61111111111111	.296296296296296	.148148148148148	.185185185185185	.407407407407407	15	12	15	1	0
1014760	0	12.9828884325804	3	3	4	.677560910174242	2.90909090909091	3.5	1.72222222222222	.333333333333333	.296296296296296	.307692307692308	.296296296296296	9	9	9	1	0
1001220	0	12.9691991786448	3	2	4	.678304688934485	3.27272727272727	3.375	2.44444444444444	.444444444444444	.185185185185185	.0740740740740741	.185185185185185	9	6	9	1	0
1000710	0	13.4839151266256	3	3	3	.678930774094015	3.09090909090909	3.5	4.38888888888889	.222222222222222	.111111111111111	.148148148148148	.481481481481481	9	9	9	1	0
1014650	1	12.6297056810404	3	3	3	.682072079703818	2.81818181818182	5	1.77777777777778	.481481481481481	.333333333333333	.407407407407407	.555555555555556	9	9	9	1	0
1003850	0	13.1362080766598	5	5	3	.682351621925167	4	4	2.72222222222222	.555555555555556	1	.777777777777778	.518518518518518	12	12	12	1	0
1001140	1	12.8186173853525	5	5	4	.684927110193391	4.09090909090909	2.625	3.38888888888889	.222222222222222	.555555555555556	.407407407407407	.407407407407407	12	12	12	1	0
1012680	0	13.7549623545517	3	2	2	.687832824570542	2.81818181818182	2.375	2.55555555555556	.518518518518518	.592592592592593	.62962962962963	.962962962962963	9	6	9	1	0
1003760	1	13.1170431211499	3	3	5	.699942241388272	2.81818181818182	4.25	3.05555555555556	.259259259259259	.555555555555556	.592592592592593	.962962962962963	9	9	9	1	0
1015750	1	13.264887063655	5	5	3	.702472259598868	3.09090909090909	3.875	4.27777777777778	.333333333333333	.407407407407407	.37037037037037	.851851851851852	12	12	12	1	0
1014080	1	12.0164271047228	3	3	3	.702599546250369	4.90909090909091	5	3.22222222222222	.296296296296296	1.55555555555556	.962962962962963	1.37037037037037	9	9	9	1	0
1015310	1	12.1232032854209	2	3	5	.705543205571826	3.27272727272727	3.125	2.05555555555556	.444444444444444	.777777777777778	.777777777777778	.777777777777778	6	9	9	1	0
1000940	1	12.3394934976044	6	5	3	.706918417689746	3.63636363636364	4.25	2.83333333333333	.296296296296296	.444444444444444	.555555555555556	.518518518518518	15	12	15	1	0
1003960	1	13.1937029431896	3	3	4	.707865555051984	4.18181818181818	3.5	4.05555555555556	.333333333333333	.222222222222222	.407407407407407	.481481481481481	9	9	9	1	0
1013390	1	12.8980150581793	2	3	3	.713362752649744	1.63636363636364	4.75	1	.703703703703704	.481481481481481	.481481481481481	.592592592592593	6	9	9	1	0
1002660	1	12.8596851471595	3	2	4	.713386271337766	3.09090909090909	4	2.16666666666667	.0740740740740741	.37037037037037	.333333333333333	.444444444444444	9	6	9	1	0
1013270	1	13.4592744695414	3	3	3	.714834647309563	2.90909090909091	3	3.22222222222222	.555555555555556	.814814814814815	.740740740740741	.925925925925926	9	9	9	1	0
1003730	1	13.201916495551	3	5	3	.715185700318871	3.27272727272727	4.5	2.38888888888889	.37037037037037	.444444444444444	.37037037037037	.407407407407407	9	12	12	1	0
1002420	1	13.0869267624914	4	4	2	.715353624571717	4.18181818181818	4.5	1.22222222222222	.222222222222222	.111111111111111	.037037037037037	.111111111111111	12	12	12	1	0
1016170	1	12.8925393566051	3	3	3	.719117136042652	2.36363636363636	2.75	1.88888888888889	.481481481481481	.518518518518518	.814814814814815	.481481481481481	9	9	9	1	0
1012670	0	12.6105407255305	4	3	3	.724025167467383	4.18181818181818	5	1.66666666666667	.0740740740740741	.037037037037037	.0740740740740741	.037037037037037	12	9	12	1	0
1016760	1	12.5256673511294	5	3	3	.726501223101326	3.81818181818182	4.5	1.44444444444444	.222222222222222	99	99	99	12	9	12	1	0
1001230	1	12.8131416837782	3	2	3	.727891771035504	3.09090909090909	3.25	2.83333333333333	.296296296296296	.518518518518518	.481481481481481	.814814814814815	9	6	9	1	0
1012690	0	12.9719370294319	1	1	4	.732267841267894	2.81818181818182	2.75	2.83333333333333	.0740740740740741	0	0	0	0	0	0	1	0
1014790	0	12.3805612594114	3	3	3	.733554521519805	3.54545454545455	4.375	2.66666666666667	.296296296296296	.259259259259259	.296296296296296	.592592592592593	9	9	9	1	0
1015830	0	12.8952772073922	2	2	5	.734357111076737	2.72727272727273	2.5	2.5	.555555555555556	.777777777777778	.518518518518518	.666666666666667	6	6	6	1	0
1003610	1	13.0677618069815	2	1	4	.735438552191462	2.36363636363636	3.375	2.66666666666667	.555555555555556	.555555555555556	.777777777777778	.666666666666667	6	0	6	1	0
1003680	1	12.3696098562628	3	3	3	.739562608329488	3.81818181818182	2.875	3.83333333333333	.592592592592593	.185185185185185	99	.62962962962963	9	9	9	1	0
1001900	1	12.6762491444216	5	2	3	.741783184153842	4.36363636363636	4.125	2.44444444444444	.0740740740740741	.148148148148148	.148148148148148	.185185185185185	12	6	12	1	0
1015320	1	13.0047912388775	3	3	5	.742563283728436	4.18181818181818	4	2.44444444444444	.111111111111111	.444444444444444	.296296296296296	.185185185185185	9	9	9	1	0
1016250	1	12.6872005475702	6	5	3	.744257937401606	4.81818181818182	4.75	2.27777777777778	.111111111111111	.222222222222222	.185185185185185	.407407407407407	15	12	15	1	0
1016210	0	12.7474332648871	5	3	3	.744705978592523	3.09090909090909	2.875	3.29411764705882	.481481481481481	.481481481481481	.444444444444444	.444444444444444	12	9	12	1	0
1016230	1	99	3	3	3	.755883158974456	3.27272727272727	3.875	3	.259259259259259	.407407407407407	.333333333333333	1.07407407407407	9	9	9	1	0
1012950	1	12.7583846680356	3	3	3	.756073401229782	3.63636363636364	4.125	2.27777777777778	.111111111111111	.148148148148148	.111111111111111	.111111111111111	9	9	9	1	0
1016020	0	13.45106091718	3	3	3	.756186018592564	3.72727272727273	4	2.05555555555556	.259259259259259	.222222222222222	.259259259259259	.296296296296296	9	9	9	1	0
1013820	1	12.1916495550992	5	5	4	.761022697528831	3.72727272727273	4.875	2.72222222222222	.148148148148148	.333333333333333	.407407407407407	.740740740740741	12	12	12	1	0
1015740	1	12.5913757700205	3	3	3	.763327127150595	3.36363636363636	4.625	2.94444444444444	.296296296296296	.481481481481481	.777777777777778	.888888888888889	9	9	9	1	0
1016730	1	14.217659137577	3	3	3	.763669020177347	2.90909090909091	3.375	2.44444444444444	.555555555555556	.814814814814815	.851851851851852	.851851851851852	9	9	9	1	0
1001610	1	12.1533196440794	3	2	4	.764268352074107	3.72727272727273	3	3.33333333333333	.444444444444444	.666666666666667	.296296296296296	.555555555555556	9	6	9	1	0
1016690	1	12.848733744011	3	3	3	.771796573580917	3.36363636363636	4.25	2.05555555555556	.148148148148148	.37037037037037	.185185185185185	.222222222222222	9	9	9	1	0
1013850	1	12.9089664613279	3	3	3	.774236760273474	4.09090909090909	4	2.22222222222222	.037037037037037	0	.259259259259259	.0740740740740741	9	9	9	1	0
1015720	0	12.3915126625599	7	5	3	.775124295520839	4.63636363636364	4.28571428571429	4.11111111111111	.518518518518518	99	99	99	16	12	16	1	0
1003650	1	13.1800136892539	5	2	3	.776182039846532	3.54545454545455	4	2.88888888888889	.185185185185185	.259259259259259	.296296296296296	.148148148148148	12	6	12	1	0
1013250	1	13.2046543463381	3	3	2	.7771093793475	3	3.75	1.88888888888889	.555555555555556	.444444444444444	.296296296296296	.962962962962963	9	9	9	1	0
1004150	1	11.8986995208761	3	3	4	.777315909648461	2.63636363636364	3.75	1.77777777777778	.555555555555556	1.11111111111111	.444444444444444	.592592592592593	9	9	9	1	0
1003830	1	12.498288843258	3	3	4	.778196038413178	4.09090909090909	3.625	2.16666666666667	.37037037037037	.148148148148148	.148148148148148	.148148148148148	9	9	9	1	0
1000450	0	13.0540725530459	3	2	4	.780951700043092	2.72727272727273	2.375	2.44444444444444	.259259259259259	.111111111111111	.222222222222222	.185185185185185	9	6	9	1	0
1014780	0	13.4236824093087	4	4	2	.786449399033588	4.45454545454545	4.875	4.88888888888889	.259259259259259	.666666666666667	.259259259259259	.37037037037037	12	12	12	1	0
1017260	1	12.9144421629021	5	5	3	.789686692761519	3.72727272727273	3.125	2.44444444444444	.0740740740740741	.62962962962963	.777777777777778	.814814814814815	12	12	12	1	0
1002200	1	12.227241615332	5	2	3	.789715435808918	4	4.75	1.88888888888889	.296296296296296	.296296296296296	.259259259259259	.185185185185185	12	6	12	1	0
1014500	0	12.870636550308	2	3	5	.792608661375588	3.81818181818182	2.75	2.5	.444444444444444	.925925925925926	.814814814814815	.666666666666667	6	9	9	1	0
1004100	0	13.6892539356605	3	2	3	.800252062534737	4.27272727272727	4.25	2.16666666666667	.481481481481481	.5	.666666666666667	.185185185185185	9	6	9	1	0
1014210	0	13.4729637234771	3	2	5	.802785790309565	1	1	1	.962962962962963	99	.185185185185185	.0740740740740741	9	6	9	1	0
1003750	1	12.7337440109514	3	3	3	.802837043995223	4.72727272727273	3.75	1.88888888888889	.0740740740740741	.148148148148148	.0740740740740741	0	9	9	9	1	0
1012750	1	12.9199178644764	2	5	4	.805098228167194	2.18181818181818	2.125	3.11111111111111	.703703703703704	.518518518518518	.407407407407407	1.14814814814815	6	12	12	1	0
1002860	1	12.8049281314168	4	3	2	.815984805862173	3.18181818181818	3	2.83333333333333	.518518518518518	.703703703703704	.62962962962963	.333333333333333	12	9	12	1	0
1016990	0	12.3093771389459	5	3	5	.816034134911755	3.90909090909091	4.75	2.55555555555556	.296296296296296	.111111111111111	.259259259259259	.222222222222222	12	9	12	1	0
1001920	1	12.974674880219	3	1	3	.82249466364051	3.09090909090909	4.25	1.94444444444444	.555555555555556	.37037037037037	.37037037037037	.481481481481481	9	0	9	1	0
1015290	1	12.6762491444216	3	3	3	.824548064527113	4.09090909090909	4.25	2.72222222222222	.222222222222222	.444444444444444	.740740740740741	.740740740740741	9	9	9	1	0
1016790	0	13.07871321013	3	3	3	.824772645642491	3.36363636363636	2.875	1.77777777777778	.333333333333333	.296296296296296	.296296296296296	.296296296296296	9	9	9	1	0
1012620	0	13.1033538672142	2	3	5	.826473625174985	1.72727272727273	4.5	2.61111111111111	.740740740740741	.555555555555556	.592592592592593	.62962962962963	6	9	9	1	0
1015770	0	12.7392197125257	2	2	3	.828096046227737	2.72727272727273	3.625	2.38888888888889	.185185185185185	.0740740740740741	.259259259259259	.185185185185185	6	6	6	1	0
1003980	1	12.8898015058179	3	5	4	.830887738166691	1.90909090909091	3.625	2.27777777777778	.62962962962963	.333333333333333	.37037037037037	.0740740740740741	9	12	12	1	0
1014770	0	12.1587953456537	2	3	5	.836510289126044	2.54545454545455	2.125	2.77777777777778	.925925925925926	.222222222222222	.0740740740740741	.0740740740740741	6	9	9	1	0
1014810	1	12.5229295003422	3	3	2	.837028357901812	4.63636363636364	3.875	4.05555555555556	.407407407407407	.407407407407407	.481481481481481	.555555555555556	9	9	9	1	0
1002370	1	12.9691991786448	3	4	3	.839761819555905	3.09090909090909	2.375	2.16666666666667	.148148148148148	.703703703703704	.259259259259259	.481481481481481	9	12	12	1	0
1016770	0	12.7638603696099	3	99	4	.854442547695561	4.09090909090909	4.75	3.38888888888889	.666666666666667	.62962962962963	.851851851851852	1.03703703703704	9	99	99	1	0
1013750	1	13.7850787132101	3	3	3	.856174739614575	4	3.375	2.22222222222222	.592592592592593	.592592592592593	.481481481481481	.666666666666667	9	9	9	1	0
1000320	0	12.7446954140999	3	3	3	.862687375694931	3.36363636363636	2.5	4.88888888888889	0	.333333333333333	.333333333333333	.925925925925926	9	9	9	1	0
1004200	1	13.45106091718	3	3	4	.870293260732726	2.72727272727273	3.375	2.77777777777778	.37037037037037	.222222222222222	.481481481481481	.222222222222222	9	9	9	1	0
1013370	1	12.643394934976	3	5	3	.877207382101929	2.09090909090909	3.5	2.77777777777778	.407407407407407	.333333333333333	.518518518518518	.333333333333333	9	12	12	1	0
1003880	0	13.1745379876797	3	3	3	.886985645967854	1.90909090909091	3.375	2.27777777777778	.37037037037037	.555555555555556	.703703703703704	.925925925925926	9	9	9	1	0
1001530	1	13.1143052703628	3	2	3	.894487966769882	2.72727272727273	3.25	1.05555555555556	.407407407407407	.592592592592593	.407407407407407	.148148148148148	9	6	9	1	0
1015340	0	12.8021902806297	3	3	3	.898590753573134	2.18181818181818	3.25	3.22222222222222	.740740740740741	.592592592592593	.555555555555556	.666666666666667	9	9	9	1	0
1017230	1	12.7036276522929	3	3	4	.898914946262254	1.81818181818182	3	4.66666666666667	1.14814814814815	99	1.11111111111111	1.07407407407407	9	9	9	1	0
1002670	1	13.1827515400411	5	3	4	.902103963363215	2.63636363636364	2.875	2.5	.518518518518518	1.03703703703704	.888888888888889	.851851851851852	12	9	12	1	0
1014700	1	99	3	2	3	.904422348808379	1	3.25	2.55555555555556	.222222222222222	.259259259259259	.185185185185185	.222222222222222	9	6	9	1	0
1013950	0	13.2183436002738	2	2	4	.905561982361265	3.36363636363636	3.875	2.38888888888889	.222222222222222	.407407407407407	.37037037037037	.555555555555556	6	6	6	1	0
1016200	0	12.7008898015058	3	3	4	.906548920042898	2	2.875	3.61111111111111	.444444444444444	.740740740740741	.296296296296296	.333333333333333	9	9	9	1	0
1015240	1	12.7200547570157	3	3	3	.908499454315194	3.54545454545455	4	1.61111111111111	.111111111111111	0	0	0	9	9	9	1	0
1003820	1	12.4736481861739	3	3	4	.918457144965086	2.72727272727273	3.5	4	.333333333333333	1.03703703703704	.962962962962963	1.2962962962963	9	9	9	1	0
1013340	1	12.6652977412731	3	3	3	.918646492079275	2.63636363636364	2.75	3.5	.259259259259259	.592592592592593	.333333333333333	.592592592592593	9	9	9	1	0
1017250	0	12.249144421629	3	3	4	.920461172318915	4.36363636363636	5	2.72222222222222	1.7037037037037	1.62962962962963	1.66666666666667	1.51851851851852	9	9	9	1	0
1004180	1	13.0869267624914	3	3	3	.921916973943466	2.72727272727273	3.375	2.72222222222222	.148148148148148	.740740740740741	.481481481481481	.703703703703704	9	9	9	1	0
1002400	0	12.8377823408624	2	5	4	.926142781215889	3.36363636363636	3.375	2.44444444444444	.37037037037037	.37037037037037	.296296296296296	.259259259259259	6	12	12	1	0
1014270	1	13.1225188227242	3	3	4	.926785379105706	3.45454545454545	3.125	3.66666666666667	.111111111111111	.259259259259259	.222222222222222	.222222222222222	9	9	9	1	0
1002380	1	12.5722108145106	2	2	3	.929038873247528	3.36363636363636	4.25	2.16666666666667	.37037037037037	.444444444444444	.333333333333333	.333333333333333	6	6	6	1	0
1016100	1	12.9911019849418	3	3	3	.934329817659132	3.27272727272727	3.625	1.55555555555556	.222222222222222	.333333333333333	.148148148148148	.333333333333333	9	9	9	1	0
1012980	0	12.3285420944559	5	5	4	.93594981650546	3.54545454545455	3.625	2.55555555555556	.444444444444444	.259259259259259	.259259259259259	.296296296296296	12	12	12	1	0
1016220	0	12.8678986995209	3	2	3	.937435460282133	2.27272727272727	2.375	3.5	.888888888888889	1	.925925925925926	.814814814814815	9	6	9	1	0
1000100	1	13.7549623545517	2	2	3	.940968226490717	3	4.875	2.61111111111111	.222222222222222	.259259259259259	0	.037037037037037	6	6	6	1	0
1003860	0	12.6735112936345	3	3	2	.943278131644828	3.09090909090909	4.375	1.5	.185185185185185	.333333333333333	.37037037037037	.925925925925926	9	9	9	1	0
1017220	1	12.9144421629021	5	5	3	.943373542550781	3.45454545454545	4.875	1.5	.222222222222222	.296296296296296	.222222222222222	.37037037037037	12	12	12	1	0
1003840	1	13.0020533880903	6	3	3	.945501848619948	3.54545454545455	3.25	4.16666666666667	.592592592592593	.703703703703704	.518518518518518	.5	15	9	15	1	0
1000950	1	12.5557837097878	3	3	3	.947634368116263	3.18181818181818	3	2.44444444444444	.259259259259259	.444444444444444	.296296296296296	.222222222222222	9	9	9	1	0
1003790	0	12.3887748117728	7	7	3	.953742808273019	2	3.25	3.05555555555556	.555555555555556	.296296296296296	.37037037037037	.37037037037037	16	16	16	1	0
1014090	1	13.1909650924025	3	3	3	.966613917827658	3.27272727272727	2.375	2.77777777777778	.518518518518518	.407407407407407	.407407407407407	.555555555555556	9	9	9	1	0
1001720	0	12.993839835729	4	5	3	.96991465698748	3.81818181818182	3.875	2.88888888888889	.481481481481481	.444444444444444	.407407407407407	.666666666666667	12	12	12	1	0
1015690	0	12.4544832306639	3	3	3	.976402009956835	3.45454545454545	3.75	3.05555555555556	.296296296296296	.153846153846154	.407407407407407	.296296296296296	9	9	9	1	0
1017210	1	14.2149212867899	2	99	5	.977964630322006	2.18181818181818	5	3.27777777777778	.962962962962963	1.03703703703704	.666666666666667	.925925925925926	6	99	99	1	0
1003920	1	13.555099247091	3	3	4	.980700354748258	3.18181818181818	3.25	2.88888888888889	.185185185185185	.666666666666667	.814814814814815	.481481481481481	9	9	9	1	0
1015780	0	12.7145790554415	3	3	4	.982904038418452	4.63636363636364	4.25	3.27777777777778	.111111111111111	.296296296296296	.111111111111111	.111111111111111	9	9	9	1	0
1003530	1	13.7056810403833	3	3	3	.987451052058479	2.81818181818182	3.5	2.61111111111111	.111111111111111	.333333333333333	.148148148148148	.259259259259259	9	9	9	1	0
1012760	0	13.3032169746749	3	3	4	.988242858322201	3.18181818181818	3.75	2.88888888888889	.296296296296296	.481481481481481	.259259259259259	.222222222222222	9	9	9	1	0
1013060	0	12.8815879534565	3	3	3	.99422248546296	4.18181818181818	4.875	2.27777777777778	.185185185185185	.37037037037037	.407407407407407	.518518518518518	9	9	9	1	0
1015800	0	12.9582477754962	3	3	5	.997227190998014	3.90909090909091	3.875	1.72222222222222	.0740740740740741	0	.111111111111111	.111111111111111	9	9	9	1	0
1003910	0	12.5119780971937	7	5	4	1.00707779412757	2.63636363636364	2.75	2.66666666666667	.333333333333333	.444444444444444	.259259259259259	.62962962962963	16	12	16	1	0
1004040	1	12.3449691991786	3	3	3	1.01226471326966	3.45454545454545	3.875	2.05555555555556	.518518518518518	.814814814814815	.888888888888889	.5	9	9	9	1	0
1003890	0	12.9555099247091	2	2	4	1.01267037774911	2.27272727272727	3.5	2.77777777777778	.296296296296296	.333333333333333	.555555555555556	.37037037037037	6	6	6	1	0
1013030	0	13.0951403148528	3	3	3	1.01634225243291	3.18181818181818	4.25	2.44444444444444	.333333333333333	.444444444444444	.423076923076923	.576923076923077	9	9	9	1	0
1013310	1	13.3086926762491	5	3	3	1.03609852831356	2.18181818181818	3.25	4.61111111111111	.62962962962963	.333333333333333	.222222222222222	.296296296296296	12	9	12	1	0
1017240	1	12.1396303901437	3	3	5	1.04064921887832	2.54545454545455	3.25	2.44444444444444	.62962962962963	.444444444444444	.777777777777778	.703703703703704	9	9	9	1	0
1013890	1	12.7994524298426	3	2	4	1.0425807835443	5	5	1.88888888888889	.0740740740740741	.592592592592593	.740740740740741	.814814814814815	9	6	9	1	0
1012840	1	12.9363449691992	6	4	2	1.04275422995731	3.18181818181818	3	3.72222222222222	.296296296296296	.259259259259259	.333333333333333	.555555555555556	15	12	15	1	0
1012820	1	13.119780971937	3	3	3	1.04745285259822	5	4.5	3.16666666666667	.222222222222222	.703703703703704	.962962962962963	.444444444444444	9	9	9	1	0
1013330	1	12.8952772073922	4	3	4	1.05727708007027	3.18181818181818	3	2.44444444444444	.814814814814815	.592592592592593	.703703703703704	.777777777777778	12	9	12	1	0
1015820	1	12.7611225188227	5	5	4	1.05991109591924	2.09090909090909	2.625	3.11111111111111	.851851851851852	.888888888888889	.777777777777778	1.22222222222222	12	12	12	1	0
1016710	0	12.4079397672827	3	3	3	1.06267078338342	3.54545454545455	4.5	2.5	.333333333333333	.37037037037037	.703703703703704	.481481481481481	9	9	9	1	0
1004010	1	12.1806981519507	3	6	5	1.06659002417324	3.36363636363636	3.5	1.72222222222222	.333333333333333	.407407407407407	.185185185185185	.62962962962963	9	15	15	1	0
1016150	0	12.8952772073922	3	3	3	1.06780538703539	2.63636363636364	2.375	2.16666666666667	.37037037037037	.481481481481481	.62962962962963	.259259259259259	9	9	9	1	0
1015330	1	12.435318275154	4	4	3	1.07969243370561	5	4.75	3.77777777777778	1.2962962962963	1	.222222222222222	.851851851851852	12	12	12	1	0
1016750	0	12.9418206707734	3	3	4	1.09355333606356	3.54545454545455	4.625	4.44444444444444	.037037037037037	.037037037037037	.111111111111111	.111111111111111	9	9	9	1	0
1013010	0	12.9965776865161	5	3	3	1.09435270256269	2.72727272727273	3.75	3.22222222222222	.222222222222222	.37037037037037	.148148148148148	.222222222222222	12	9	12	1	0
1012810	1	13.119780971937	3	3	3	1.10341329070624	3.90909090909091	5	2.88888888888889	.333333333333333	.592592592592593	.518518518518518	.62962962962963	9	9	9	1	0
1013990	1	12.7200547570157	3	3	3	1.11204021568508	2	2	2.16666666666667	.259259259259259	.259259259259259	.555555555555556	.37037037037037	9	9	9	1	0
1017270	0	13.6344969199179	3	2	3	1.118198833671	3.72727272727273	4.125	2.72222222222222	.925925925925926	.740740740740741	.481481481481481	.259259259259259	9	6	9	1	0
1003740	1	13.305954825462	5	3	4	1.12165799567517	2.45454545454545	2.125	3.38888888888889	.962962962962963	1	1.03703703703704	.777777777777778	12	9	12	1	0
1015810	1	12.290212183436	2	2	3	1.14174283592241	3.72727272727273	3.625	1.55555555555556	.592592592592593	.407407407407407	1.03703703703704	.703703703703704	6	6	6	1	0
1001450	0	12.041067761807	3	3	4	1.16338567069418	3.27272727272727	2.625	3.44444444444444	.518518518518518	.703703703703704	.407407407407407	.814814814814815	9	9	9	1	0
1014320	0	12.5749486652977	3	3	3	1.16933709353344	4.27272727272727	5	1.44444444444444	0	0	0	0	9	9	9	1	0
1014820	1	12.1314168377823	3	3	4	1.17715621445307	4	3.125	2.55555555555556	.444444444444444	.333333333333333	.592592592592593	.555555555555556	9	9	9	1	0
1017200	1	12.7446954140999	3	3	3	1.19683636012216	2.81818181818182	2.75	2.61111111111111	.259259259259259	.333333333333333	.222222222222222	.333333333333333	9	9	9	1	0
1014860	1	12.7693360711841	3	2	5	1.20091020297112	5	4.75	3.5	.481481481481481	.407407407407407	.518518518518518	.222222222222222	9	6	9	1	0
1016680	0	12.7720739219713	3	3	4	1.21358686314273	3.45454545454545	3.875	3.94444444444444	.444444444444444	.481481481481481	.518518518518518	.444444444444444	9	9	9	1	0
1014830	1	12.4818617385352	3	3	4	1.22022954170377	3.90909090909091	5	2.11111111111111	.148148148148148	.148148148148148	.148148148148148	.148148148148148	9	9	9	1	0
1017280	1	12.186173853525	3	3	4	1.23003409332803	3.81818181818182	3.875	1.5	.333333333333333	.851851851851852	.925925925925926	.962962962962963	9	9	9	1	0
1014290	0	13.0403832991102	3	3	5	1.24180187433086	3.54545454545455	3.375	1.66666666666667	.259259259259259	.851851851851852	.0740740740740741	.333333333333333	9	9	9	1	0
1013910	1	13.4346338124572	3	3	3	1.26133440857631	3.27272727272727	2.75	3.22222222222222	.592592592592593	.518518518518518	.259259259259259	.444444444444444	9	9	9	1	0
1016280	0	12.6652977412731	6	7	4	1.29472693132832	3.72727272727273	2.625	3.77777777777778	.222222222222222	.407407407407407	1.18518518518519	.62962962962963	15	16	16	1	0
1014870	0	12.9883641341547	3	3	3	1.32449136306994	3.36363636363636	4	2.72222222222222	.111111111111111	.111111111111111	.111111111111111	.296296296296296	9	9	9	1	0
1012730	1	12.6899383983573	3	3	4	1.32592836516385	3.54545454545455	4.125	2.61111111111111	.740740740740741	.851851851851852	.185185185185185	.0740740740740741	9	9	9	1	0
1014840	1	14.4339493497604	1	2	3	1.34164914838984	3.27272727272727	5	1.27777777777778	.518518518518518	.592592592592593	.444444444444444	.666666666666667	0	6	6	1	0
1016300	0	13.3388090349076	3	3	4	1.36075380326145	3.45454545454545	3.875	2.77777777777778	.592592592592593	.740740740740741	.518518518518518	.555555555555556	9	9	9	1	0
1017300	0	13.1991786447639	3	2	5	1.38823342185122	3.45454545454545	3.5	1.5	.259259259259259	.777777777777778	.814814814814815	.296296296296296	9	6	9	1	0
1013210	1	12.7720739219713	3	3	4	1.39472298073442	2.45454545454545	4.375	2.11111111111111	.555555555555556	.666666666666667	.444444444444444	.407407407407407	9	9	9	1	0
1016810	1	12.7091033538672	3	3	4	1.49878623000266	4.36363636363636	5	1.77777777777778	.148148148148148	.296296296296296	.333333333333333	.481481481481481	9	9	9	1	0
1008840	1	13.056810403833	3	3	3	99	4.36363636363636	4.5	2.22222222222222	.222222222222222	.888888888888889	99	1.22222222222222	9	9	9	0	1
1004730	1	12.4024640657084	5	5	2	99	3.27272727272727	4.5	1.38888888888889	.111111111111111	.296296296296296	.703703703703704	.407407407407407	12	12	12	0	1
1005130	1	13.4483230663929	5	3	3	99	3.72727272727273	4.25	2.38888888888889	.481481481481481	.592592592592593	.592592592592593	.333333333333333	12	9	12	0	1
1006410	1	11.7152635181383	3	3	5	99	3.63636363636364	4.125	2.27777777777778	.185185185185185	.333333333333333	.259259259259259	.444444444444444	9	9	9	0	1
1005060	0	12.848733744011	3	3	3	99	3.27272727272727	4	1.88888888888889	.592592592592593	.740740740740741	.814814814814815	.62962962962963	9	9	9	0	1
1007590	1	12.2108145106092	3	1	4	99	3.72727272727273	4	2.16666666666667	.703703703703704	.222222222222222	.555555555555556	.481481481481481	9	0	9	0	1
1005150	1	13.2292950034223	5	2	4	99	4.36363636363636	3.875	2.38888888888889	.703703703703704	.481481481481481	.407407407407407	.222222222222222	12	6	12	0	1
1005020	0	12.9308692676249	2	5	4	99	4	3.625	3.1875	.62962962962963	.740740740740741	.851851851851852	.592592592592593	6	12	12	0	1
1011210	0	12.6461327857632	3	3	2	99	3.63636363636364	3.375	2.27777777777778	.444444444444444	.740740740740741	.444444444444444	.481481481481481	9	9	9	0	1
1006230	1	12.8405201916496	3	3	2	99	4.09090909090909	3.375	3.55555555555556	1.03703703703704	99	99	.962962962962963	9	9	9	0	1
1007190	0	12.8624229979466	3	3	3	99	3.27272727272727	3.125	4.11111111111111	.888888888888889	99	99	99	9	9	9	0	1
1005240	1	13.1170431211499	4	3	2	99	3.90909090909091	3.125	3.66666666666667	.740740740740741	.925925925925926	1.03703703703704	.740740740740741	12	9	12	0	1
1010080	0	12.0191649555099	3	5	3	99	3.27272727272727	3	2.5	.925925925925926	.962962962962963	.592592592592593	.814814814814815	9	12	12	0	1
1011230	1	13.2676249144422	3	2	4	99	3.81818181818182	3	3.88888888888889	.444444444444444	.703703703703704	.814814814814815	.703703703703704	9	6	9	0	1
1005160	0	13.2457221081451	5	5	4	99	3.72727272727273	2.625	3	.259259259259259	.518518518518518	1	1	12	12	12	0	1
1005140	1	13.1964407939767	7	7	4	99	4.27272727272727	2.625	2.22222222222222	.777777777777778	.481481481481481	.37037037037037	.666666666666667	16	16	16	0	1
1010700	0	14.2614647501711	2	1	2	-2.57757787194077	2.6	2	2.11111111111111	.846153846153846	99	99	99	6	0	6	0	1
1009950	0	99	1	5	3	-2.56835958540693	2.81818181818182	2.875	3.27777777777778	.730769230769231	.592592592592593	.888888888888889	99	0	12	12	0	1
1011010	0	13.8206707734428	2	2	3	-2.47396540177714	2.36363636363636	2.625	3.05555555555556	.407407407407407	.333333333333333	.37037037037037	.444444444444444	6	6	6	0	1
1008430	0	15.4168377823409	5	3	4	-2.39828131005592	4.27272727272727	3.25	3.27777777777778	.384615384615385	1.14814814814815	.888888888888889	99	12	9	12	0	1
1009870	0	12.9801505817933	3	3	2	-2.35839118219537	2.72727272727273	3.57142857142857	2.11111111111111	.407407407407407	.384615384615385	1.04	.62962962962963	9	9	9	0	1
1007490	0	13.3196440793977	3	3	5	-2.32160346307868	2.18181818181818	3.125	2.61111111111111	.37037037037037	.518518518518518	1.33333333333333	99	9	9	9	0	1
1007070	0	99	3	3	3	-2.28423970260045	3.54545454545455	3.625	3	.518518518518518	.555555555555556	.62962962962963	.592592592592593	9	9	9	0	1
1008180	0	13.4236824093087	3	3	3	-2.27455206197649	2.45454545454545	3.125	2.3125	.37037037037037	.814814814814815	.555555555555556	.333333333333333	9	9	9	0	1
1009490	1	13.6344969199179	3	3	2	-2.23943774668457	2.63636363636364	2.375	2.61111111111111	.925925925925926	1.03703703703704	.925925925925926	.777777777777778	9	9	9	0	1
1011960	0	12.6762491444216	3	3	2	-2.21913062541483	4.27272727272727	3	2.88888888888889	.222222222222222	1.38461538461538	99	99	9	9	9	0	1
1007400	0	14.4695414099932	3	2	3	-2.1726451023165	2.45454545454545	1.125	1.22222222222222	1	.925925925925926	.846153846153846	.884615384615385	9	6	9	0	1
1012420	1	13.5140314852841	3	3	2	-2.16329902218196	2.45454545454545	4	1.83333333333333	.333333333333333	.481481481481481	1.18518518518519	.481481481481481	9	9	9	0	1
1008320	0	13.8809034907598	3	3	4	-2.1585294782627	2.54545454545455	3.125	2.72222222222222	.444444444444444	.814814814814815	.666666666666667	.592592592592593	9	9	9	0	1
1008560	1	13.223819301848	3	2	3	-2.1541938958587	2.5	3.375	2.83333333333333	.444444444444444	.925925925925926	1.03703703703704	99	9	6	9	0	1
1009610	0	12.6406570841889	3	3	4	-2.13367346378929	3.18181818181818	2.5	2.41176470588235	1.11111111111111	.814814814814815	.962962962962963	1.11111111111111	9	9	9	0	1
1011160	0	13.0677618069815	2	3	3	-2.11784932198446	3.72727272727273	3.125	2.44444444444444	.36	.185185185185185	.37037037037037	99	6	9	9	0	1
1012250	0	13.1827515400411	3	3	3	-2.1071512479925	3.36363636363636	3.125	3	.481481481481481	.296296296296296	.481481481481481	.296296296296296	9	9	9	0	1
1009370	0	12.7939767282683	3	3	3	-2.07343576188918	3.45454545454545	5	3.11111111111111	.851851851851852	.703703703703704	.777777777777778	.666666666666667	9	9	9	0	1
1007170	1	13.3004791238877	3	3	3	-2.06339291969794	2.54545454545455	4.5	5	.592592592592593	.592592592592593	.407407407407407	.423076923076923	9	9	9	0	1
1008230	0	13.4620123203285	5	3	3	-2.05851335206872	3.90909090909091	4.375	4.5	.142857142857143	.703703703703704	.333333333333333	99	12	9	12	0	1
1012280	0	13.6536618754278	1	3	3	-2.04441970470236	3.18181818181818	2.875	3	.37037037037037	.444444444444444	.407407407407407	.333333333333333	0	9	9	0	1
1006970	0	12.5667351129363	5	3	3	-2.03746801100525	2.81818181818182	3.25	2.16666666666667	.666666666666667	1.03703703703704	1	99	12	9	12	0	1
1009940	0	14.0177960301164	3	3	3	-2.01845286381461	3.09090909090909	5	3.11111111111111	.666666666666667	1	99	99	9	9	9	0	1
1011970	0	13.1060917180014	3	3	3	-2.01315785035116	3.81818181818182	3.875	3.38888888888889	.407407407407407	.111111111111111	.555555555555556	.407407407407407	9	9	9	0	1
1008490	1	12.9828884325804	3	3	3	-2.00636642737846	2.54545454545455	2.5	2.77777777777778	.518518518518518	.703703703703704	.481481481481481	.444444444444444	9	9	9	0	1
1010930	0	13.1526351813826	2	2	4	-2.00195377321301	2.90909090909091	3.875	3.11764705882353	.576923076923077	.222222222222222	.730769230769231	1.14814814814815	6	6	6	0	1
1008620	0	12.7830253251198	2	4	3	-2.00047713015605	4.18181818181818	3.25	1.61111111111111	.333333333333333	.62962962962963	.407407407407407	.222222222222222	6	12	12	0	1
1010660	0	13.0759753593429	3	2	2	-1.98318789781685	3.54545454545455	4	3.77777777777778	.846153846153846	.740740740740741	99	99	9	6	9	0	1
1012120	0	13.5523613963039	3	2	5	-1.97068096014473	2.54545454545455	2.625	2.77777777777778	.481481481481481	.444444444444444	.296296296296296	99	9	6	9	0	1
1009510	0	13.2457221081451	2	3	3	-1.96598765980744	5	3.5	5	1.07407407407407	.62962962962963	.518518518518518	.814814814814815	6	9	9	0	1
1012450	0	13.1498973305955	2	4	3	-1.96316738075972	3	3.125	1.83333333333333	.444444444444444	.185185185185185	.518518518518518	.444444444444444	6	12	12	0	1
1009700	0	13.2676249144422	2	2	3	-1.94047476145849	2.54545454545455	3.125	3.41176470588235	.407407407407407	.444444444444444	.333333333333333	.518518518518518	6	6	6	0	1
1006910	0	99	4	4	1	-1.92638815573155	3.36363636363636	3.625	3.83333333333333	.538461538461538	.5	.814814814814815	.423076923076923	12	12	12	0	1
1008260	0	12.6269678302533	2	1	4	-1.89508160663372	1.63636363636364	3.5	2.88888888888889	.592592592592593	.730769230769231	.555555555555556	99	6	0	6	0	1
1012230	1	14.1382614647502	2	2	3	-1.89438424219728	3.45454545454545	3	2.72222222222222	1.11111111111111	.481481481481481	.703703703703704	1	6	6	6	0	1
1007500	0	13.2156057494867	5	3	2	-1.8849725068545	2.90909090909091	5	3.55555555555556	.740740740740741	.407407407407407	.592592592592593	.666666666666667	12	9	12	0	1
1009710	1	14.0698151950719	3	2	2	-1.88473393824372	2.54545454545455	3	2.38888888888889	.555555555555556	.769230769230769	.37037037037037	.666666666666667	9	6	9	0	1
1009500	1	12.8624229979466	2	3	2	-1.88257804067207	3.45454545454545	2.625	3.33333333333333	.555555555555556	99	.703703703703704	99	6	9	9	0	1
1009390	0	13.7713894592745	3	3	2	-1.86621462247677	2.90909090909091	3.25	1.66666666666667	.518518518518518	.666666666666667	.592592592592593	.925925925925926	9	9	9	0	1
1010840	0	13.223819301848	3	2	4	-1.86048717584027	3.36363636363636	4.5	3.77777777777778	.62962962962963	.538461538461538	.888888888888889	.961538461538462	9	6	9	0	1
1012130	0	99	5	3	3	-1.85748948933897	2.54545454545455	3.75	2.72222222222222	.407407407407407	.538461538461538	.481481481481481	.37037037037037	12	9	12	0	1
1009520	0	12.848733744011	5	99	4	-1.85675078069945	2.63636363636364	3.25	2.61111111111111	.259259259259259	.518518518518518	.37037037037037	.555555555555556	12	99	12	0	1
1007370	0	13.6865160848734	3	2	1	-1.84895964143259	2.09090909090909	2	2.94444444444444	.37037037037037	.666666666666667	.407407407407407	.555555555555556	9	6	9	0	1
1008400	0	14.8172484599589	3	3	3	-1.82992781669624	3	3.75	3.5	.592592592592593	99	99	99	9	9	9	0	1
1009630	1	13.7303216974675	3	3	3	-1.82374387351413	2.45454545454545	3	2.27777777777778	1.33333333333333	.925925925925926	.851851851851852	1.07407407407407	9	9	9	0	1
1011920	0	13.864476386037	3	3	3	-1.81956788089777	3.36363636363636	3.875	2.27777777777778	.481481481481481	.666666666666667	.62962962962963	.555555555555556	9	9	9	0	1
1012410	0	13.7385352498289	3	3	2	-1.81930576827823	4	3	3	1.03703703703704	.888888888888889	.777777777777778	.666666666666667	9	9	9	0	1
1007310	0	13.8398357289528	2	2	4	-1.81735253438824	2	3.125	4	1.18518518518519	1	.851851851851852	.296296296296296	6	6	6	0	1
1006930	1	14.0533880903491	3	3	3	-1.81151890259892	3.45454545454545	4	3.27777777777778	.481481481481481	.333333333333333	.296296296296296	99	9	9	9	0	1
1007160	0	12.9281314168378	3	2	4	-1.81003353869699	3.18181818181818	3.25	3.55555555555556	.444444444444444	.37037037037037	.76	.592592592592593	9	6	9	0	1
1009570	1	12.4681724845996	3	3	4	-1.80947819951225	2.81818181818182	2.75	2.94444444444444	.444444444444444	.259259259259259	.777777777777778	.888888888888889	9	9	9	0	1
1007010	1	16.1396303901437	3	2	5	-1.80585015168161	3	3	2.61111111111111	.346153846153846	.296296296296296	1.08695652173913	.444444444444444	9	6	9	0	1
1012390	1	13.8945927446954	3	3	3	-1.78398488500343	2.90909090909091	3.125	2.33333333333333	.222222222222222	.259259259259259	.5	.703703703703704	9	9	9	0	1
1008150	0	13.1526351813826	3	5	2	-1.76754411721612	3.09090909090909	4.75	2.72222222222222	.740740740740741	1.14814814814815	.703703703703704	.888888888888889	9	12	12	0	1
1011940	0	14.3819301848049	2	2	99	-1.76027724165075	1.36363636363636	3.125	2.66666666666667	.740740740740741	.518518518518518	.307692307692308	99	6	6	6	0	1
1007060	1	12.6379192334018	3	3	2	-1.74846157647497	3.63636363636364	1.875	4.11111111111111	.259259259259259	99	.68	99	9	9	9	0	1
1010810	0	99	2	3	4	-1.7401098530245	3.36363636363636	3.25	3.05882352941176	.740740740740741	.592592592592593	.148148148148148	.111111111111111	6	9	9	0	1
1009820	0	13.9739904175222	3	5	3	-1.73574394463562	3.90909090909091	4.5	3.72222222222222	1	1.22222222222222	1	1.2962962962963	9	12	12	0	1
1012460	1	12.0438056125941	3	3	3	-1.72615584242612	3.27272727272727	3.625	1.77777777777778	.703703703703704	.37037037037037	.148148148148148	.259259259259259	9	9	9	0	1
1006940	0	14.1601642710472	3	3	4	-1.71564308106329	2	1.375	3.94444444444444	.730769230769231	99	99	99	9	9	9	0	1
1008340	0	11.8439425051335	3	2	4	-1.71206497847656	2.81818181818182	2.75	3.66666666666667	.444444444444444	.407407407407407	.37037037037037	.37037037037037	9	6	9	0	1
1008210	1	13.0376454483231	3	2	4	-1.69300995829444	2.18181818181818	3.5	3.44444444444444	.444444444444444	.703703703703704	.666666666666667	.769230769230769	9	6	9	0	1
1007100	0	13.2375085557837	3	3	3	-1.69000634429098	3.90909090909091	4.125	4.17647058823529	.555555555555556	.222222222222222	99	99	9	9	9	0	1
1008300	0	14.1464750171116	3	3	3	-1.6894651554051	1.81818181818182	2.625	2.55555555555556	.740740740740741	.62962962962963	.592592592592593	.444444444444444	9	9	9	0	1
1009640	0	13.9438740588638	3	3	3	-1.67754307345891	2.27272727272727	2.75	2.94444444444444	1.07407407407407	.888888888888889	.444444444444444	.666666666666667	9	9	9	0	1
1009440	0	12.539356605065	2	2	4	-1.66582402833544	1.33333333333333	1.5	2.88888888888889	1.03703703703704	1.14814814814815	.555555555555556	.888888888888889	6	6	6	0	1
1007210	0	14.2149212867899	99	2	3	-1.66486768385245	4.1	3	2.77777777777778	.37037037037037	.37037037037037	99	99	99	6	99	0	1
1012080	0	13.8781656399726	5	3	3	-1.66026592440169	3.63636363636364	4.42857142857143	4	.592592592592593	.703703703703704	.185185185185185	.148148148148148	12	9	12	0	1
1007380	0	12.6954140999316	5	5	2	-1.64399646257319	3.72727272727273	4.625	5	.037037037037037	.222222222222222	.62962962962963	.0740740740740741	12	12	12	0	1
1012470	0	12.5284052019165	5	5	3	-1.64014810651224	4.36363636363636	4	3.38888888888889	.851851851851852	.888888888888889	.851851851851852	.538461538461538	12	12	12	0	1
1010670	0	12.8678986995209	3	2	3	-1.63580285686826	4.63636363636364	3.5	4.77777777777778	1	.222222222222222	.259259259259259	.153846153846154	9	6	9	0	1
1008240	0	12.7173169062286	5	5	3	-1.63301880606562	4.63636363636364	3.71428571428571	2.22222222222222	0	.259259259259259	.333333333333333	0	12	12	12	0	1
1012010	0	12.9007529089665	3	3	3	-1.61768034326618	1.36363636363636	3.5	2.27777777777778	.518518518518518	.777777777777778	99	.296296296296296	9	9	9	0	1
1008170	0	12.6242299794661	5	5	4	-1.61111756105489	5	5	2.33333333333333	.148148148148148	.62962962962963	.259259259259259	.185185185185185	12	12	12	0	1
1012060	0	12.8815879534565	7	3	4	-1.60211440256604	2.09090909090909	3	2.77777777777778	.111111111111111	.37037037037037	.333333333333333	.703703703703704	16	9	16	0	1
1009780	0	13.5605749486653	2	3	3	-1.59790728549844	3.81818181818182	2.75	2.47058823529412	1.30769230769231	.925925925925926	.925925925925926	1.03703703703704	6	9	9	0	1
1011020	1	12.6570841889117	3	3	3	-1.57301992146559	3.09090909090909	1.875	2.5	.555555555555556	.518518518518518	.518518518518518	99	9	9	9	0	1
1009590	0	13.9520876112252	3	3	5	-1.54626928700711	2.90909090909091	3.375	3.44444444444444	1.55555555555556	.96	1	1.18518518518519	9	9	9	0	1
1009810	0	13.6700889801506	3	3	3	-1.53775353483636	2	2.375	4.66666666666667	.666666666666667	.961538461538462	1.37037037037037	1.2962962962963	9	9	9	0	1
1008630	0	13.3442847364819	5	3	3	-1.53598789157021	2.81818181818182	1	4.55555555555556	1.03703703703704	1.48148148148148	99	1.07407407407407	12	9	12	0	1
1010980	1	99	5	3	3	-1.53184964759667	1.72727272727273	1.25	1.83333333333333	.518518518518518	.740740740740741	99	99	12	9	12	0	1
1009900	1	12.394250513347	3	3	2	-1.52682517263523	5	5	2.05555555555556	.62962962962963	1.11111111111111	1.07407407407407	.555555555555556	9	9	9	0	1
1008530	1	13.1991786447639	6	5	3	-1.52504515186356	3.45454545454545	2.28571428571429	3.23529411764706	.444444444444444	.576923076923077	.407407407407407	.444444444444444	15	12	15	0	1
1006040	0	12.7583846680356	4	4	3	-1.52425836548007	2.54545454545455	3.5	2.38888888888889	.37037037037037	.444444444444444	99	99	12	12	12	0	1
1009920	0	12.6324435318275	3	99	2	-1.52208429384248	3.45454545454545	4	3.66666666666667	.666666666666667	.666666666666667	1	.62962962962963	9	99	99	0	1
1006990	0	12.9609856262834	5	2	3	-1.51996088768133	2.81818181818182	2.875	3.05555555555556	.740740740740741	.666666666666667	99	99	12	6	12	0	1
1011050	1	13.0841889117043	5	5	3	-1.50472468911126	3.45454545454545	3.625	3.38888888888889	.730769230769231	.481481481481481	.407407407407407	.5	12	12	12	0	1
1009880	1	13.429158110883	3	3	3	-1.50292997350572	3.63636363636364	3.375	2.66666666666667	.37037037037037	.148148148148148	.444444444444444	.481481481481481	9	9	9	0	1
1008440	0	13.6974674880219	3	3	3	-1.49624201158206	3.54545454545455	3.375	1.88888888888889	.222222222222222	.185185185185185	99	.111111111111111	9	9	9	0	1
1011460	0	99	3	3	3	-1.48246488237995	2.81818181818182	3	3.05555555555556	.851851851851852	.703703703703704	.666666666666667	.777777777777778	9	9	9	0	1
1008680	0	12.517453798768	3	3	3	-1.46939520115783	3.81818181818182	4.5	4.27777777777778	.185185185185185	.407407407407407	.62962962962963	.407407407407407	9	9	9	0	1
1009600	0	14.7515400410678	3	3	3	-1.45684432149511	3.27272727272727	3.125	2.27777777777778	.37037037037037	.111111111111111	.185185185185185	.259259259259259	9	9	9	0	1
1009930	0	14.1492128678987	3	1	2	-1.43701328679622	2.45454545454545	4.125	3.38888888888889	.37037037037037	.423076923076923	.592592592592593	.518518518518518	9	0	9	0	1
1012220	0	14.7268993839836	2	2	3	-1.43608892914474	3.36363636363636	3.125	2.16666666666667	.333333333333333	.777777777777778	.518518518518518	.851851851851852	6	6	6	0	1
1009830	0	13.1690622861054	3	2	3	-1.4168060929426	4.18181818181818	3.75	3.16666666666667	.111111111111111	0	.703703703703704	.37037037037037	9	6	9	0	1
1009800	1	13.0513347022587	3	3	4	-1.41051541522101	4.09090909090909	3.5	3	.444444444444444	.518518518518518	.555555555555556	.62962962962963	9	9	9	0	1
1008160	1	11.9945242984257	3	3	3	-1.3977308478291	2.72727272727273	3.125	1.88888888888889	.407407407407407	.666666666666667	.703703703703704	1	9	9	9	0	1
1007020	1	17.0102669404517	2	1	3	-1.39740768232376	2.18181818181818	3.375	3.11111111111111	.481481481481481	.62962962962963	.740740740740741	99	6	0	6	0	1
1011930	0	12.9774127310062	2	3	3	-1.38807591333092	3.1	3.25	2.77777777777778	.592592592592593	.0740740740740741	99	.333333333333333	6	9	9	0	1
1008660	0	12.290212183436	5	3	4	-1.35589229878687	3.27272727272727	4	3.94444444444444	.592592592592593	.555555555555556	.296296296296296	.481481481481481	12	9	12	0	1
1012110	1	14.6885694729637	2	1	3	-1.35527513077414	2.36363636363636	3	2.55555555555556	.185185185185185	.222222222222222	.259259259259259	.518518518518518	6	0	6	0	1
1012070	0	14.009582477755	3	3	4	-1.3491047393587	3	3	3.22222222222222	.740740740740741	.703703703703704	99	99	9	9	9	0	1
1012440	0	13.678302532512	2	2	2	-1.3472213326908	3.09090909090909	3.25	3	.296296296296296	.407407407407407	.222222222222222	.259259259259259	6	6	6	0	1
1008140	0	13.7303216974675	3	1	4	-1.34350502734741	3.63636363636364	3.5	2.55555555555556	.333333333333333	.851851851851852	.814814814814815	1.66666666666667	9	0	9	0	1
1012100	0	12.7611225188227	2	3	3	-1.33686612980475	4.45454545454545	4.125	1.83333333333333	.296296296296296	.407407407407407	99	99	6	9	9	0	1
1011170	1	12.3285420944559	3	3	4	-1.33590924060167	2.54545454545455	3.25	2.94444444444444	.259259259259259	.333333333333333	.185185185185185	.37037037037037	9	9	9	0	1
1011900	0	13.0212183436003	3	3	2	-1.3331998071466	2.90909090909091	2.5	2.61111111111111	.259259259259259	.481481481481481	.444444444444444	99	9	9	9	0	1
1010920	0	13.3333333333333	3	3	3	-1.33256657998916	2.90909090909091	2.71428571428571	2.77777777777778	.461538461538462	.925925925925926	.518518518518518	1.03703703703704	9	9	9	0	1
1012000	1	13.9767282683094	3	3	3	-1.33128260337497	1.54545454545455	3	2.72222222222222	.740740740740741	.777777777777778	.851851851851852	1.07407407407407	9	9	9	0	1
1012290	1	13.264887063655	3	3	3	-1.32601505688976	2.45454545454545	2.625	2.83333333333333	.777777777777778	.814814814814815	.777777777777778	1	9	9	9	0	1
1010770	0	12.2464065708419	3	3	3	-1.32099940649079	2.27272727272727	3	3.22222222222222	.333333333333333	.407407407407407	.296296296296296	.407407407407407	9	9	9	0	1
1010710	0	13.8918548939083	4	2	3	-1.28821931029802	2.45454545454545	3.25	2.72222222222222	.259259259259259	.407407407407407	.481481481481481	.222222222222222	12	6	12	0	1
1008310	0	14.631074606434	2	2	2	-1.28154462283054	3.18181818181818	1.5	3.22222222222222	.72	.888888888888889	1.04	.888888888888889	6	6	6	0	1
1010880	0	14.1984941820671	3	3	3	-1.27245062083422	2.90909090909091	3.375	1.94444444444444	.666666666666667	.925925925925926	.555555555555556	.814814814814815	9	9	9	0	1
1012170	1	99	3	2	4	-1.2695240612756	3.81818181818182	3.125	2.22222222222222	.814814814814815	.62962962962963	.37037037037037	.703703703703704	9	6	9	0	1
1008250	0	12.5284052019165	5	5	3	-1.26470756839802	2.63636363636364	2.5	2.52941176470588	.444444444444444	.481481481481481	.407407407407407	99	12	12	12	0	1
1006140	0	13.1718001368925	2	3	3	-1.26136719620524	2.81818181818182	2.25	2.38888888888889	.37037037037037	.62962962962963	.222222222222222	99	6	9	9	0	1
1008350	0	12.6981519507187	2	3	4	-1.25430070099075	3.36363636363636	2.75	3.5	.555555555555556	.407407407407407	.592592592592593	.777777777777778	6	9	9	0	1
1009530	1	12.5201916495551	2	1	3	-1.24514330883026	3	3.75	2.77777777777778	.296296296296296	.576923076923077	.444444444444444	.555555555555556	6	0	6	0	1
1010650	0	13.3442847364819	1	3	3	-1.24407125823159	2.81818181818182	2.75	2.5	.518518518518518	.64	.592592592592593	.37037037037037	0	9	9	0	1
1008420	0	12.3778234086242	4	3	3	-1.23486608546837	2.81818181818182	4.125	4.27777777777778	1.07407407407407	.666666666666667	1.03703703703704	.814814814814815	12	9	12	0	1
1012040	1	13.45106091718	3	3	3	-1.23232342468896	2.72727272727273	2.875	2.83333333333333	.296296296296296	.296296296296296	.37037037037037	.444444444444444	9	9	9	0	1
1008380	0	12.5256673511294	3	3	3	-1.23205827667922	3.45454545454545	3.875	1.66666666666667	.153846153846154	.259259259259259	99	.333333333333333	9	9	9	0	1
1008670	0	13.0841889117043	5	5	3	-1.2156260154757	3.45454545454545	4	2.66666666666667	.148148148148148	.222222222222222	.666666666666667	99	12	12	12	0	1
1006900	0	12.7693360711841	3	3	3	-1.2042308385872	3.09090909090909	4.125	2	.259259259259259	.296296296296296	.37037037037037	.37037037037037	9	9	9	0	1
1007150	1	13.6016427104723	4	5	2	-1.1997487176635	2.63636363636364	3.125	3.5	1.14814814814815	1.08	99	99	12	12	12	0	1
1012210	0	99	2	3	3	-1.18989396365503	3	3.375	2.77777777777778	.423076923076923	.296296296296296	.333333333333333	.259259259259259	6	9	9	0	1
1012350	1	13.5496235455168	3	2	2	-1.18964525531556	2.36363636363636	2.875	2.11111111111111	.703703703703704	.555555555555556	.518518518518518	.555555555555556	9	6	9	0	1
1012380	0	14.2450376454483	2	3	3	-1.1853127302232	3.18181818181818	3	2.55555555555556	.703703703703704	.444444444444444	.666666666666667	.814814814814815	6	9	9	0	1
1008110	0	99	3	3	4	-1.16350559134556	3.90909090909091	4.5	3.72222222222222	.481481481481481	99	99	99	9	9	9	0	1
1011180	1	12.8405201916496	5	3	3	-1.16246967879472	4.09090909090909	1.75	3.05555555555556	.925925925925926	.962962962962963	.888888888888889	.666666666666667	12	9	12	0	1
1008690	1	12.4271047227926	3	3	3	-1.16069919258498	5	4	1.44444444444444	.37037037037037	.407407407407407	.962962962962963	.333333333333333	9	9	9	0	1
1008220	0	12.8049281314168	3	3	2	-1.15574986852286	3.36363636363636	4	3.72222222222222	.740740740740741	.555555555555556	.703703703703704	.62962962962963	9	9	9	0	1
1007200	0	13.3826146475017	3	1	4	-1.15501071416766	2.45454545454545	2.5	2.27777777777778	.592592592592593	.481481481481481	.666666666666667	.407407407407407	9	0	9	0	1
1012400	0	13.5140314852841	5	3	2	-1.1534385446354	3.45454545454545	3	1.72222222222222	.259259259259259	.222222222222222	.653846153846154	99	12	9	12	0	1
1012050	0	13.4045174537988	5	5	3	-1.14829534326388	3.54545454545455	3.25	2.55555555555556	.703703703703704	99	99	99	12	12	12	0	1
1011880	0	12.1341546885695	3	3	4	-1.13737927841923	3.27272727272727	4.375	3.27777777777778	.37037037037037	.518518518518518	.37037037037037	.37037037037037	9	9	9	0	1
1009770	0	13.3004791238877	3	1	3	-1.1360841880613	2.90909090909091	2.25	4.33333333333333	.296296296296296	.62962962962963	.592592592592593	.481481481481481	9	0	9	0	1
1007220	0	99	3	3	3	-1.13421186719726	3.18181818181818	3.375	3.77777777777778	.62962962962963	.851851851851852	99	99	9	9	9	0	1
1010990	0	12.7227926078029	3	3	4	-1.12596023495798	3.18181818181818	3.25	2.61111111111111	.333333333333333	.37037037037037	.259259259259259	.333333333333333	9	9	9	0	1
1009960	0	13.782340862423	5	5	4	-1.12461236692981	3.09090909090909	3.25	3.16666666666667	.555555555555556	.666666666666667	.555555555555556	.592592592592593	12	12	12	0	1
1005760	1	12.8131416837782	5	3	3	-1.12410752610842	3.36363636363636	3.25	2.83333333333333	1.03703703703704	.962962962962963	1.03703703703704	.555555555555556	12	9	12	0	1
1009670	1	13.3223819301848	3	3	3	-1.12386948314369	3.27272727272727	3.75	3.44444444444444	.666666666666667	.592592592592593	.62962962962963	.518518518518518	9	9	9	0	1
1012330	1	12.8323066392882	3	3	4	-1.11781724372479	3	3	2.88888888888889	.555555555555556	.407407407407407	99	99	9	9	9	0	1
1005500	0	13.0650239561944	99	99	3	-1.1169603852827	3.9	2.125	2.55555555555556	.652173913043478	99	99	99	99	99	99	0	1
1006950	0	12.8624229979466	4	5	3	-1.10620102081906	3.36363636363636	3.375	3.33333333333333	.444444444444444	.296296296296296	.148148148148148	.037037037037037	12	12	12	0	1
1012160	0	14.1656399726215	5	5	3	-1.10577598305942	4.18181818181818	4	2.33333333333333	.222222222222222	.259259259259259	.259259259259259	.185185185185185	12	12	12	0	1
1007480	1	13.3169062286105	3	3	1	-1.10384948010645	3.81818181818182	4.125	2.16666666666667	.037037037037037	.037037037037037	.296296296296296	.115384615384615	9	9	9	0	1
1010860	1	13.5167693360712	3	1	5	-1.10238051847321	3	3.375	3.44444444444444	.962962962962963	.37037037037037	99	99	9	0	9	0	1
1009410	0	12.3394934976044	3	2	3	-1.10040493422705	3.36363636363636	2.75	3.05555555555556	.111111111111111	.111111111111111	99	99	9	6	9	0	1
1012190	0	13.927446954141	4	5	3	-1.09850607767251	3.72727272727273	2.625	2.55555555555556	.222222222222222	.444444444444444	.333333333333333	.814814814814815	12	12	12	0	1
1009740	0	12.7994524298426	2	2	4	-1.09659567235064	3.63636363636364	3.75	3.44444444444444	.37037037037037	.62962962962963	.407407407407407	.296296296296296	6	6	6	0	1
1009560	1	12.8240930869268	3	2	2	-1.09107965537722	4	2.42857142857143	3.38888888888889	1.11111111111111	.185185185185185	.037037037037037	0	9	6	9	0	1
1010170	1	12.9472963723477	6	6	3	-1.09095658505428	2.45454545454545	3	2.38888888888889	1.18518518518519	.851851851851852	99	99	15	15	15	0	1
1011850	0	13.2156057494867	3	3	5	-1.08788326795279	5	5	3.22222222222222	.222222222222222	.222222222222222	.518518518518518	.692307692307692	9	9	9	0	1
1006980	0	12.5913757700205	3	2	3	-1.08650442463647	3.63636363636364	2.875	2.83333333333333	.333333333333333	.259259259259259	.555555555555556	.153846153846154	9	6	9	0	1
1009470	1	13.3305954825462	3	2	99	-1.08091472055925	2.27272727272727	1.75	2.27777777777778	.615384615384615	.481481481481481	.333333333333333	99	9	6	9	0	1
1010110	0	14.1081451060917	3	3	4	-1.07837903077774	2.63636363636364	3.625	2.83333333333333	1.03703703703704	.518518518518518	.703703703703704	99	9	9	9	0	1
1007280	0	13.9876796714579	3	2	3	-1.07631106166917	2.27272727272727	3.125	2.55555555555556	.777777777777778	.925925925925926	1	1.37037037037037	9	6	9	0	1
1008580	1	13.3552361396304	3	2	3	-1.06520490072503	3.09090909090909	1.75	2.77777777777778	.888888888888889	.592592592592593	.740740740740741	.851851851851852	9	6	9	0	1
1010970	0	12.041067761807	2	2	4	-1.05367922526496	2.81818181818182	3	3.61111111111111	.777777777777778	.666666666666667	.888888888888889	.740740740740741	6	6	6	0	1
1012370	1	13.2813141683778	3	3	3	-1.05199412226188	3	3.625	3.33333333333333	.814814814814815	.111111111111111	.814814814814815	.37037037037037	9	9	9	0	1
1010870	0	14.9760438056126	5	1	2	-1.04820577588957	3.36363636363636	3.375	3.22222222222222	.148148148148148	.259259259259259	.296296296296296	.185185185185185	12	0	12	0	1
1010800	1	13.5441478439425	2	2	2	-1.03338658996282	3.27272727272727	3.625	2.94444444444444	.481481481481481	.222222222222222	99	.769230769230769	6	6	6	0	1
1009450	0	12.1122518822724	4	2	3	-1.02507054063504	3.09090909090909	3.25	2.66666666666667	.481481481481481	.111111111111111	.444444444444444	.37037037037037	12	6	12	0	1
1009430	0	13.5140314852841	3	2	4	-1.02484167278635	4.54545454545455	3.125	2.66666666666667	.296296296296296	.296296296296296	.185185185185185	.148148148148148	9	6	9	0	1
1011120	0	12.7036276522929	5	3	3	-1.01058478959578	3.63636363636364	3.125	2.33333333333333	.666666666666667	.37037037037037	99	.481481481481481	12	9	12	0	1
1008360	0	12.7173169062286	3	3	3	-1.00450105056965	3.72727272727273	3.125	3.27777777777778	.333333333333333	.333333333333333	.222222222222222	.0740740740740741	9	9	9	0	1
1009350	0	13.3032169746749	3	2	4	-1.00439681803047	3.18181818181818	3.125	3	.444444444444444	.703703703703704	99	.444444444444444	9	6	9	0	1
1010540	1	12.6598220396988	3	3	3	-1.00397162496517	2.90909090909091	3.75	2.5	.5	.37037037037037	.333333333333333	99	9	9	9	0	1
1010640	0	13.3552361396304	3	4	3	-1.00217451195977	3.27272727272727	4	1.61111111111111	.777777777777778	.666666666666667	.592592592592593	.814814814814815	9	12	12	0	1
1007090	0	13.2457221081451	3	3	3	-.993549920920823	2.90909090909091	3.125	2.77777777777778	.37037037037037	.296296296296296	.346153846153846	.444444444444444	9	9	9	0	1
1010890	0	99	5	3	3	-.989375930164312	3.36363636363636	2.5	2.77777777777778	.37037037037037	.333333333333333	.37037037037037	.222222222222222	12	9	12	0	1
1008640	0	13.0102669404517	5	5	3	-.986027895520523	4.81818181818182	4.875	3.27777777777778	.769230769230769	.777777777777778	.888888888888889	1.03703703703704	12	12	12	0	1
1011030	1	13.3196440793977	2	3	3	-.979387990582366	2.72727272727273	3.5	2.27777777777778	.407407407407407	.444444444444444	.37037037037037	.407407407407407	6	9	9	0	1
1011870	1	12.8021902806297	3	3	3	-.977793889867872	3.45454545454545	4.125	2.44444444444444	.481481481481481	.703703703703704	.740740740740741	.666666666666667	9	9	9	0	1
1010680	1	14.280629705681	3	3	4	-.977472159331587	1.63636363636364	1.25	1.94444444444444	.62962962962963	.703703703703704	.740740740740741	.666666666666667	9	9	9	0	1
1005850	1	12.6789869952088	99	99	3	-.975270578820371	3.09090909090909	4.125	2.05555555555556	.703703703703704	.666666666666667	.925925925925926	99	99	99	99	0	1
1007040	0	13.119780971937	6	6	4	-.97288062537547	4.27272727272727	4.75	4.38888888888889	.222222222222222	.444444444444444	.296296296296296	.259259259259259	15	15	15	0	1
1009280	1	13.2703627652293	2	6	1	-.966584567709423	3.09090909090909	2.42857142857143	2.22222222222222	.407407407407407	.592592592592593	99	99	6	15	15	0	1
1007470	1	13.3524982888433	3	3	3	-.955373717072387	3.27272727272727	3.5	3.61111111111111	.703703703703704	.666666666666667	.62962962962963	.692307692307692	9	9	9	0	1
1008190	0	13.9931553730322	3	3	2	-.953905322453519	4.81818181818182	4.875	3	0	.555555555555556	.444444444444444	99	9	9	9	0	1
1011240	0	14.3572895277207	3	3	3	-.952261740906805	1.36363636363636	2.25	2.55555555555556	.740740740740741	99	99	99	9	9	9	0	1
1010590	1	11.9890485968515	5	3	2	-.950875085842771	4	4.25	2	1.07407407407407	.962962962962963	1.03703703703704	1.18518518518519	12	9	12	0	1
1010750	1	12.3066392881588	3	3	3	-.94089510467103	2.27272727272727	2.5	2.5	.481481481481481	.555555555555556	.666666666666667	.481481481481481	9	9	9	0	1
1009480	0	13.2758384668036	3	4	3	-.939086630470383	4.36363636363636	3.375	3.27777777777778	.481481481481481	.259259259259259	.259259259259259	.185185185185185	9	12	12	0	1
1008390	0	14.0917180013689	2	2	3	-.915615290105382	4.09090909090909	3.625	2.72222222222222	.148148148148148	.111111111111111	.0740740740740741	.444444444444444	6	6	6	0	1
1011300	0	12.7501711156742	3	3	3	-.91114147241927	4.81818181818182	4.875	4.38888888888889	.222222222222222	.333333333333333	.185185185185185	.444444444444444	9	9	9	0	1
1011670	0	12.5859000684463	5	3	3	-.910519005451583	4.45454545454545	4.75	1.44444444444444	.259259259259259	.185185185185185	.0740740740740741	.296296296296296	12	9	12	0	1
1009760	0	14.0643394934976	3	2	3	-.909402748225537	2.63636363636364	2.375	2.77777777777778	.666666666666667	.518518518518518	.444444444444444	.518518518518518	9	6	9	0	1
1007260	0	16.0082135523614	3	3	2	-.900596944526361	4.09090909090909	3.875	4.11111111111111	.0769230769230769	99	99	99	9	9	9	0	1
1011220	0	12.2573579739904	3	2	4	-.899572229349037	4.18181818181818	3.75	3.27777777777778	.444444444444444	.37037037037037	.259259259259259	.481481481481481	9	6	9	0	1
1009680	0	12.8542094455852	3	3	3	-.899436692707505	3.09090909090909	3.75	2.47058823529412	.296296296296296	.407407407407407	.222222222222222	.296296296296296	9	9	9	0	1
1011070	0	13.3223819301848	3	99	4	-.888880761609056	2.09090909090909	1.75	2.77777777777778	1.11538461538462	99	1.03846153846154	99	9	99	99	0	1
1011150	1	12.1971252566735	4	4	3	-.872494336767865	3.18181818181818	4.5	1.5	.407407407407407	.703703703703704	.333333333333333	.444444444444444	12	12	12	0	1
1010630	0	12.9034907597536	3	3	3	-.872066891454142	4.63636363636364	4.375	3.94444444444444	.962962962962963	1	.777777777777778	.923076923076923	9	9	9	0	1
1007510	0	13.1143052703628	4	4	3	-.872022853558334	3.18181818181818	3.5	2.27777777777778	.444444444444444	.62962962962963	.518518518518518	.592592592592593	12	12	12	0	1
1009290	0	13.3497604380561	3	2	4	-.871989481676976	2	1.375	3.72222222222222	.555555555555556	.481481481481481	.222222222222222	.333333333333333	9	6	9	0	1
1005630	1	13.2457221081451	2	3	3	-.86874958949502	2	3.25	2.44444444444444	.851851851851852	.62962962962963	.814814814814815	.814814814814815	6	9	9	0	1
1009460	1	13.886379192334	3	2	99	-.863959228592771	3.18181818181818	3.125	3.38888888888889	.5	.666666666666667	99	.666666666666667	9	6	9	0	1
1007390	1	13.5797399041752	3	3	3	-.863006900526875	4.72727272727273	4	3.27777777777778	.259259259259259	.148148148148148	.111111111111111	.037037037037037	9	9	9	0	1
1012320	0	13.2867898699521	2	2	3	-.857350801031068	2.81818181818182	4.625	3.11111111111111	0	.259259259259259	.222222222222222	.222222222222222	6	6	6	0	1
1011980	1	13.056810403833	5	3	3	-.852795571984761	4.27272727272727	4.625	2.33333333333333	.518518518518518	1	1.25925925925926	1.22222222222222	12	9	12	0	1
1012200	1	14.5571526351814	3	2	3	-.843997739250618	3.45454545454545	3.5	3.05555555555556	.444444444444444	.333333333333333	.481481481481481	.653846153846154	9	6	9	0	1
1011890	0	14.4750171115674	3	3	3	-.842003965347896	3.18181818181818	4.125	2.22222222222222	.666666666666667	.740740740740741	.925925925925926	99	9	9	9	0	1
1011250	0	13.5879534565366	3	2	4	-.837694944937861	2.09090909090909	2.75	2.72222222222222	1.07407407407407	1	.962962962962963	99	9	6	9	0	1
1008460	0	11.1567419575633	5	3	3	-.836256564883374	4.81818181818182	4	2.77777777777778	.375	.259259259259259	.481481481481481	.384615384615385	12	9	12	0	1
1010730	0	14.0780287474333	3	5	3	-.835115646465488	3.27272727272727	3.875	2.88888888888889	.481481481481481	.64	.518518518518518	.5	9	12	12	0	1
1012020	1	12.7693360711841	3	3	2	-.831999577485613	2.09090909090909	1.875	2.55555555555556	.296296296296296	.222222222222222	.592592592592593	.518518518518518	9	9	9	0	1
1010060	0	12.7802874743326	5	3	3	-.830941993406517	2.45454545454545	3	2.72222222222222	.814814814814815	.740740740740741	.730769230769231	.888888888888889	12	9	12	0	1
1007080	1	13.3114305270363	3	3	2	-.823537435825012	3.63636363636364	3.125	2.77777777777778	.777777777777778	.777777777777778	99	99	9	9	9	0	1
1005920	0	12.5913757700205	2	3	3	-.81833816557563	2.4	1.25	3.22222222222222	.407407407407407	.777777777777778	99	99	6	9	9	0	1
1011990	1	13.2402464065708	5	2	3	-.814461068737587	3.72727272727273	4	2.33333333333333	.407407407407407	.62962962962963	.740740740740741	.96	12	6	12	0	1
1007320	0	12.6488706365503	5	5	3	-.801133979028718	4.81818181818182	5	1.88888888888889	.185185185185185	.333333333333333	.037037037037037	.148148148148148	12	12	12	0	1
1011320	1	12.0219028062971	3	5	3	-.80070406531739	3.36363636363636	4.875	1.33333333333333	.148148148148148	.259259259259259	.259259259259259	.296296296296296	9	12	12	0	1
1009790	0	12.5503080082136	3	3	3	-.80038581541915	3.81818181818182	4	3.16666666666667	.333333333333333	.703703703703704	.333333333333333	.518518518518518	9	9	9	0	1
1007030	1	14.031485284052	3	2	2	-.799821961233354	3.36363636363636	4	3.29411764705882	.740740740740741	.814814814814815	.407407407407407	.62962962962963	9	6	9	0	1
1008570	1	12.5694729637235	3	3	3	-.79631404831792	4	4.75	2.38888888888889	.269230769230769	.461538461538462	.777777777777778	.62962962962963	9	9	9	0	1
1008850	0	14.0561259411362	3	2	3	-.793380741001918	3.09090909090909	4.25	2.05555555555556	.333333333333333	.518518518518518	.481481481481481	.296296296296296	9	6	9	0	1
1011950	0	13.1362080766598	6	3	3	-.793264160397012	2.90909090909091	2.625	3.27777777777778	.333333333333333	.259259259259259	.296296296296296	.222222222222222	15	9	15	0	1
1010690	0	13.1581108829569	3	3	3	-.790679522986149	1.81818181818182	3	2.61111111111111	99	.269230769230769	.407407407407407	99	9	9	9	0	1
1005620	0	13.3169062286105	5	5	3	-.789008851419294	3.45454545454545	3	2.86666666666667	.962962962962963	1.07407407407407	1.22222222222222	1.16	12	12	12	0	1
1007050	1	12.7529089664613	3	2	4	-.788466924152553	5	2.875	3	.5	.407407407407407	.592592592592593	.444444444444444	9	6	9	0	1
1011620	1	13.2867898699521	3	3	2	-.785153661462439	5	4.875	4.16666666666667	.814814814814815	.518518518518518	.888888888888889	.62962962962963	9	9	9	0	1
1005510	1	13.0458590006845	3	3	3	-.781873936484339	3.81818181818182	3.75	1.5	.62962962962963	.222222222222222	.111111111111111	.259259259259259	9	9	9	0	1
1008470	1	14.9349760438056	3	1	3	-.78105146854084	4.90909090909091	5	1.55555555555556	.444444444444444	.444444444444444	.407407407407407	.296296296296296	9	0	9	0	1
1008520	1	12.993839835729	5	5	3	-.776113245173653	3.72727272727273	3.125	2.11111111111111	.333333333333333	.481481481481481	.37037037037037	.555555555555556	12	12	12	0	1
1009380	1	13.8809034907598	2	2	2	-.772447637982349	1.81818181818182	4.5	2.61111111111111	.296296296296296	99	99	99	6	6	6	0	1
1007430	1	12.7501711156742	4	4	3	-.765939620823863	2.72727272727273	2.375	3.94444444444444	1.40740740740741	1.25925925925926	1.22222222222222	1.66666666666667	12	12	12	0	1
1011100	0	13.0622861054073	2	2	3	-.764409804089783	3.18181818181818	3.25	2.11111111111111	.592592592592593	.481481481481481	.62962962962963	.592592592592593	6	6	6	0	1
1012430	0	12.8898015058179	3	3	3	-.75831942287673	4.27272727272727	4	3.16666666666667	.185185185185185	.407407407407407	.185185185185185	.333333333333333	9	9	9	0	1
1007340	1	12.7173169062286	3	3	3	-.749504913086049	2.90909090909091	3.125	2.94444444444444	.222222222222222	.333333333333333	.62962962962963	.555555555555556	9	9	9	0	1
1009690	0	12.062970568104	3	3	3	-.742887906967816	2.72727272727273	4.125	1.5	.363636363636364	.434782608695652	.296296296296296	.296296296296296	9	9	9	0	1
1007300	1	13.6016427104723	3	3	3	-.739572842243193	3.63636363636364	3.375	2.72222222222222	.481481481481481	.846153846153846	99	1.11111111111111	9	9	9	0	1
1009720	1	13.347022587269	3	3	4	-.739317306804746	3.72727272727273	3.625	2.94444444444444	.62962962962963	.814814814814815	.740740740740741	.814814814814815	9	9	9	0	1
1008800	0	14.2505133470226	2	2	4	-.730802041001693	3.54545454545455	4.125	3.52941176470588	.259259259259259	.407407407407407	.518518518518518	.407407407407407	6	6	6	0	1
1007240	1	12.8542094455852	2	3	3	-.729677022247531	4.45454545454545	4.625	1.72222222222222	.37037037037037	.37037037037037	.222222222222222	.222222222222222	6	9	9	0	1
1008590	1	13.2265571526352	3	3	2	-.725219893685671	4	3.375	3.83333333333333	.37037037037037	.888888888888889	1.11111111111111	1	9	9	9	0	1
1012480	1	13.9520876112252	3	3	3	-.723246080795446	3.54545454545455	3.625	3	.555555555555556	.555555555555556	.296296296296296	.555555555555556	9	9	9	0	1
1007330	0	13.3552361396304	4	4	3	-.722313696604747	3.45454545454545	3.125	1.38888888888889	.333333333333333	.259259259259259	.111111111111111	.296296296296296	12	12	12	0	1
1012340	0	13.4346338124572	3	3	3	-.720613335678962	2.72727272727273	2.875	3.11111111111111	.481481481481481	.259259259259259	.259259259259259	.555555555555556	9	9	9	0	1
1009130	1	15.2580424366872	3	2	3	-.718698908254436	1.45454545454545	1.875	3.27777777777778	.592592592592593	.703703703703704	99	99	9	6	9	0	1
1010280	1	99	3	2	3	-.710968294566778	3.63636363636364	4.5	2.88888888888889	.185185185185185	.222222222222222	.222222222222222	.333333333333333	9	6	9	0	1
1011740	0	13.1800136892539	2	2	4	-.710855771927237	2.09090909090909	2	4	.333333333333333	.592592592592593	.555555555555556	.62962962962963	6	6	6	0	1
1007000	1	13.3004791238877	2	2	4	-.703123878891907	1.63636363636364	2.25	1.5	.296296296296296	.111111111111111	.296296296296296	.259259259259259	6	6	6	0	1
1012140	0	13.2594113620808	2	2	4	-.69988775723015	4.18181818181818	2.25	2.16666666666667	.444444444444444	.481481481481481	.592592592592593	.592592592592593	6	6	6	0	1
1010600	1	12.643394934976	3	3	3	-.69845154307228	4.45454545454545	4.875	2.27777777777778	.259259259259259	.259259259259259	.296296296296296	.259259259259259	9	9	9	0	1
1010290	1	13.8343600273785	3	3	3	-.695601638325849	1.72727272727273	2.25	3	.555555555555556	.703703703703704	1.33333333333333	1.07407407407407	9	9	9	0	1
1011090	0	13.2594113620808	3	1	3	-.695171358095024	2.54545454545455	3.125	2.66666666666667	.269230769230769	.37037037037037	.296296296296296	.296296296296296	9	0	9	0	1
1011110	0	13.0595482546201	3	3	3	-.686995266049101	2.81818181818182	2.5	3.27777777777778	.592592592592593	.518518518518518	.814814814814815	.62962962962963	9	9	9	0	1
1010900	1	13.8179329226557	5	3	3	-.680506846869712	4.72727272727273	4	3.5	.259259259259259	.333333333333333	.814814814814815	.814814814814815	12	9	12	0	1
1008280	1	13.7275838466804	2	4	3	-.677818017997707	3.36363636363636	3.75	4.5	.962962962962963	.777777777777778	.925925925925926	.62962962962963	6	12	12	0	1
1010450	1	13.845311430527	3	3	3	-.659195686318924	2.27272727272727	1.5	3.83333333333333	.666666666666667	.407407407407407	.5	1.16	9	9	9	0	1
1007440	1	99	3	3	3	-.657140886738835	2.63636363636364	1.5	1.72222222222222	1	1.07407407407407	1.40740740740741	1.22222222222222	9	9	9	0	1
1011610	1	14.4722792607803	3	1	4	-.657139367800864	4.63636363636364	3.875	3.88888888888889	.518518518518518	.62962962962963	.444444444444444	99	9	0	9	0	1
1008330	0	12.5776865160849	3	3	3	-.654730187855345	3.27272727272727	3.75	3.27777777777778	.555555555555556	.740740740740741	.185185185185185	.259259259259259	9	9	9	0	1
1010460	0	12.5886379192334	5	5	4	-.654002467912732	3.09090909090909	2.75	3.44444444444444	.538461538461538	1.04	.62962962962963	.518518518518518	12	12	12	0	1
1007270	0	13.5523613963039	3	3	3	-.652087274780007	2.5	2.5	3.33333333333333	.333333333333333	.407407407407407	.444444444444444	.444444444444444	9	9	9	0	1
1010500	0	12.4654346338125	3	3	3	-.649695969066577	3.63636363636364	3.5	2.94444444444444	.62962962962963	.384615384615385	.222222222222222	.296296296296296	9	9	9	0	1
1007140	0	12.8131416837782	2	2	3	-.645447353288651	4.45454545454545	2.875	3.27777777777778	.333333333333333	.222222222222222	.555555555555556	99	6	6	6	0	1
1007420	0	12.9253935660507	5	3	4	-.645080749844873	2.63636363636364	2.75	3.11111111111111	.148148148148148	.153846153846154	.296296296296296	.148148148148148	12	9	12	0	1
1006560	1	12.2874743326489	6	6	3	-.638032337854805	4.18181818181818	2.25	3.61111111111111	.814814814814815	.814814814814815	.888888888888889	.962962962962963	15	15	15	0	1
1009620	0	99	3	3	3	-.63374792737455	4.54545454545455	3.5	2.83333333333333	.222222222222222	.148148148148148	.333333333333333	.259259259259259	9	9	9	0	1
1007110	0	12.621492128679	3	3	3	-.633269913876786	3.36363636363636	2.125	4.16666666666667	.814814814814815	.444444444444444	99	.888888888888889	9	9	9	0	1
1007350	1	13.2785763175907	3	2	3	-.616297252964516	2.45454545454545	3.5	3.38888888888889	.444444444444444	.888888888888889	.740740740740741	.407407407407407	9	6	9	0	1
1008370	0	13.741273100616	3	3	3	-.615007380043887	4	4.75	2.22222222222222	.0740740740740741	.111111111111111	.62962962962963	.666666666666667	9	9	9	0	1
1010340	0	11.9753593429158	2	2	4	-.614168394422477	2.72727272727273	3.125	3	.814814814814815	.851851851851852	.666666666666667	.62962962962963	6	6	6	0	1
1005890	0	13.1252566735113	4	3	3	-.611747680003982	3.09090909090909	2.375	3.66666666666667	.777777777777778	99	99	99	12	9	12	0	1
1012180	0	13.0212183436003	2	2	3	-.610975259766818	3.72727272727273	3.25	3.16666666666667	.333333333333333	99	99	99	6	6	6	0	1
1010830	1	13.3196440793977	3	3	3	-.606345748031738	2.54545454545455	2.75	2.33333333333333	.592592592592593	.851851851851852	.814814814814815	.703703703703704	9	9	9	0	1
1010720	0	12.3367556468172	5	3	3	-.602122044804358	3.72727272727273	4	1.83333333333333	.333333333333333	.407407407407407	.666666666666667	.777777777777778	12	9	12	0	1
1006160	0	13.2210814510609	4	5	2	-.595358892299667	3.54545454545455	3.625	2.5	.259259259259259	.222222222222222	.592592592592593	.222222222222222	12	12	12	0	1
1009420	1	13.2566735112936	2	1	5	-.588673206653808	3.72727272727273	2.75	3.33333333333333	.62962962962963	.481481481481481	.259259259259259	.296296296296296	6	0	6	0	1
1011420	0	12.5722108145106	3	3	3	-.582928674998921	4.36363636363636	3.75	3	.888888888888889	.703703703703704	.296296296296296	99	9	9	9	0	1
1008810	0	12.6762491444216	3	3	4	-.58248097420906	4.45454545454545	4.625	4.22222222222222	.333333333333333	.296296296296296	.185185185185185	.259259259259259	9	9	9	0	1
1005950	0	13.5249828884326	2	2	3	-.581110929688045	3.09090909090909	2.625	1.66666666666667	.481481481481481	.666666666666667	.814814814814815	.666666666666667	6	6	6	0	1
1005480	0	13.388090349076	7	5	2	-.578635265288071	3.54545454545455	3.625	3.44444444444444	.518518518518518	.814814814814815	.555555555555556	.62962962962963	16	12	16	0	1
1009270	0	12.8569472963723	99	99	99	-.556556328338433	3	3.75	2.22222222222222	.64	.296296296296296	.814814814814815	.407407407407407	99	99	99	0	1
1009330	0	12.5065023956194	6	5	2	-.551546369754145	4.63636363636364	5	3.5	.37037037037037	.444444444444444	.740740740740741	.925925925925926	15	12	15	0	1
1008870	1	12.3011635865845	3	3	3	-.550976639631285	3.09090909090909	3.25	2.38888888888889	.814814814814815	.62962962962963	.592592592592593	.333333333333333	9	9	9	0	1
1005910	0	12.6872005475702	5	5	3	-.549513987495593	3.36363636363636	3.875	1.77777777777778	.296296296296296	.296296296296296	.666666666666667	.296296296296296	12	12	12	0	1
1009540	0	13.8699520876112	3	3	3	-.546873017727257	3.18181818181818	2.85714285714286	3.11111111111111	.62962962962963	.407407407407407	.592592592592593	.592592592592593	9	9	9	0	1
1007360	1	12.1259411362081	5	3	4	-.54545250859729	2	2.375	4.38888888888889	.62962962962963	.851851851851852	.444444444444444	1	12	9	12	0	1
1011140	0	12.2327173169062	3	5	3	-.544850330035875	3	3.5	1.88888888888889	.222222222222222	.259259259259259	.444444444444444	.37037037037037	9	12	12	0	1
1012090	0	13.0184804928131	3	3	3	-.542790911995748	2.90909090909091	2.875	2.55555555555556	.333333333333333	1.18518518518519	99	99	9	9	9	0	1
1005430	0	13.3169062286105	3	3	3	-.530555391260965	2.90909090909091	1.5	4.11111111111111	.555555555555556	.444444444444444	99	.37037037037037	9	9	9	0	1
1010820	0	12.4900752908966	2	3	3	-.52988911192657	3.27272727272727	2.75	3.72222222222222	.888888888888889	.592592592592593	.518518518518518	.777777777777778	6	9	9	0	1
1010950	0	13.2156057494867	5	5	3	-.524702046250399	3.54545454545455	3.5	2.16666666666667	.666666666666667	.703703703703704	.666666666666667	.666666666666667	12	12	12	0	1
1008740	1	12.6954140999316	3	3	4	-.518415211199769	3.18181818181818	2.375	2.44444444444444	.296296296296296	.444444444444444	.777777777777778	.925925925925926	9	9	9	0	1
1007450	0	13.7303216974675	3	3	3	-.514566583423934	3.72727272727273	3.5	3.44444444444444	.37037037037037	.333333333333333	.333333333333333	.222222222222222	9	9	9	0	1
1011200	1	12.9363449691992	5	5	3	-.5122228046291	4.09090909090909	4.625	3.44444444444444	.333333333333333	.407407407407407	1.03703703703704	.407407407407407	12	12	12	0	1
1011520	0	99	3	3	3	-.51008507861622	5	4.5	3.22222222222222	.62962962962963	.481481481481481	.703703703703704	.851851851851852	9	9	9	0	1
1011470	1	13.0047912388775	3	3	3	-.509637379302388	3.63636363636364	3.875	2.55555555555556	.423076923076923	.444444444444444	.555555555555556	.518518518518518	9	9	9	0	1
1009190	1	12.3367556468172	3	3	4	-.505974645740413	2.54545454545455	2.625	3.66666666666667	.185185185185185	99	99	99	9	9	9	0	1
1009910	1	12.9856262833676	3	3	4	-.505830715753186	3	4.75	2.5	.846153846153846	.592592592592593	.296296296296296	.259259259259259	9	9	9	0	1
1011360	0	12.2190280629706	5	3	4	-.501758682544381	4.63636363636364	3.875	4.05882352941176	.666666666666667	.444444444444444	.62962962962963	.653846153846154	12	9	12	0	1
1009340	1	99	3	3	5	-.497485713002912	3.81818181818182	3.25	2.33333333333333	.615384615384615	.407407407407407	.37037037037037	.777777777777778	9	9	9	0	1
1008410	0	12.1204654346338	5	3	5	-.493052521673561	3.36363636363636	3	2.66666666666667	.111111111111111	.259259259259259	.185185185185185	.0740740740740741	12	9	12	0	1
1008940	1	13.2128678986995	3	3	3	-.492419252033826	3	2.375	2.38888888888889	.592592592592593	.444444444444444	.296296296296296	.333333333333333	9	9	9	0	1
1010790	1	13.2785763175907	3	1	3	-.492360784674601	2.63636363636364	3.375	2.61111111111111	.740740740740741	.333333333333333	.407407407407407	.407407407407407	9	0	9	0	1
1009660	1	99	3	3	2	-.485448865578574	3.45454545454545	3.875	2.76470588235294	.259259259259259	.148148148148148	.296296296296296	.185185185185185	9	9	9	0	1
1009010	0	13.1115674195756	2	2	4	-.460047734579346	2.45454545454545	3.375	3	.518518518518518	.777777777777778	.576923076923077	.538461538461538	6	6	6	0	1
1006090	1	12.6351813826146	3	3	3	-.459646541471492	3.45454545454545	3.625	2.72222222222222	.555555555555556	.518518518518518	.777777777777778	.740740740740741	9	9	9	0	1
1009750	0	14.5379876796715	3	3	3	-.458543974738055	2.81818181818182	2.375	2.72222222222222	.730769230769231	.777777777777778	.592592592592593	.481481481481481	9	9	9	0	1
1008970	0	13.9657768651609	2	3	5	-.45560096295753	2.72727272727273	2.75	2.77777777777778	.296296296296296	.592592592592593	.777777777777778	.814814814814815	6	9	9	0	1
1008780	0	13.6563997262149	2	2	4	-.446840711486872	2.36363636363636	2.125	3.38888888888889	.62962962962963	.851851851851852	.407407407407407	.444444444444444	6	6	6	0	1
1011400	1	12.4845995893224	5	3	4	-.446333810027105	3.54545454545455	3.5	1.72222222222222	.769230769230769	.407407407407407	.888888888888889	.851851851851852	12	9	12	0	1
1005970	0	12.7994524298426	5	5	3	-.443254791000289	3.36363636363636	4.375	3.72222222222222	.222222222222222	.259259259259259	.185185185185185	.185185185185185	12	12	12	0	1
1011080	0	12.7337440109514	2	2	3	-.437072737303299	3.27272727272727	3	2.94444444444444	.666666666666667	.518518518518518	.740740740740741	.407407407407407	6	6	6	0	1
1011380	1	11.4332648870637	2	3	3	-.434874545843063	3.54545454545455	2.625	2.55555555555556	.666666666666667	.555555555555556	99	.555555555555556	6	9	9	0	1
1012260	1	14.0999315537303	2	2	5	-.432572418420336	1.90909090909091	2.5	3.44444444444444	.666666666666667	.518518518518518	.481481481481481	.37037037037037	6	6	6	0	1
1005520	1	12.4599589322382	2	5	3	-.423245369289408	4.18181818181818	3.375	3.27777777777778	.814814814814815	.814814814814815	.814814814814815	.444444444444444	6	12	12	0	1
1005870	1	13.2320328542094	3	3	4	-.42311736427232	3.72727272727273	3.875	2.33333333333333	.37037037037037	.444444444444444	.333333333333333	.37037037037037	9	9	9	0	1
1007460	0	14.8035592060233	3	3	4	-.421865280015057	4	4.625	2.66666666666667	.384615384615385	.111111111111111	.259259259259259	99	9	9	9	0	1
1005930	1	12.6187542778919	3	3	3	-.420214686616281	4.27272727272727	4	2.38888888888889	.192307692307692	.444444444444444	.62962962962963	.851851851851852	9	9	9	0	1
1006280	1	11.9260780287474	3	3	3	-.410278833810463	3.09090909090909	4.375	2.94117647058824	.111111111111111	.037037037037037	.222222222222222	.185185185185185	9	9	9	0	1
1005590	0	12.9965776865161	5	3	3	-.408133889747	3.81818181818182	3.75	2	1	1.07407407407407	1.33333333333333	1.25925925925926	12	9	12	0	1
1006890	0	13.5770020533881	3	3	3	-.400455695673171	2.54545454545455	4	2.61111111111111	.333333333333333	.222222222222222	.222222222222222	.444444444444444	9	9	9	0	1
1008290	1	11.7754962354552	5	3	2	-.400193228499352	3.90909090909091	4.25	4.44444444444444	1.18518518518519	0	.148148148148148	1.11111111111111	12	9	12	0	1
1010760	0	12.1971252566735	3	3	3	-.399265487094345	2.90909090909091	2.625	2.55555555555556	.875	.666666666666667	.666666666666667	.888888888888889	9	9	9	0	1
1009890	1	13.2375085557837	2	1	3	-.398975530799552	2.54545454545455	2.75	2.66666666666667	.666666666666667	.62962962962963	.407407407407407	.518518518518518	6	0	6	0	1
1007130	0	13.4373716632444	3	3	3	-.395371838115472	3.72727272727273	3.25	3.33333333333333	.259259259259259	.37037037037037	.444444444444444	.444444444444444	9	9	9	0	1
1005410	0	14.2477754962355	3	3	3	-.390475001867463	4.63636363636364	2.75	2.88888888888889	.481481481481481	99	99	99	9	9	9	0	1
1011350	1	12.9472963723477	5	3	3	-.389666766466299	3.27272727272727	1.625	4.33333333333333	.777777777777778	.407407407407407	.666666666666667	.777777777777778	12	9	12	0	1
1009260	1	12.5366187542779	3	2	3	-.389345690538172	2.27272727272727	1.625	3.72222222222222	1.07407407407407	1.07407407407407	99	99	9	6	9	0	1
1008980	0	13.9520876112252	5	2	4	-.384721638455273	1.54545454545455	1.25	2.55555555555556	1.07407407407407	.925925925925926	1.44444444444444	.333333333333333	12	6	12	0	1
1010740	1	13.6098562628337	6	3	5	-.379088449614872	3.36363636363636	3.375	2.94444444444444	.666666666666667	.666666666666667	.666666666666667	.62962962962963	15	9	15	0	1
1005330	1	12.6652977412731	5	2	2	-.378123330945354	3.90909090909091	3.75	2.38888888888889	.740740740740741	.851851851851852	99	99	12	6	12	0	1
1006030	0	13.5195071868583	5	3	3	-.373334892411494	3.45454545454545	3.25	4.22222222222222	.391304347826087	.296296296296296	.851851851851852	.555555555555556	12	9	12	0	1
1008920	0	13.4236824093087	3	3	3	-.358895111529385	4.09090909090909	3.875	3	.222222222222222	.111111111111111	.222222222222222	.111111111111111	9	9	9	0	1
1007120	1	12.8240930869268	3	2	3	-.358857534523856	3.45454545454545	2.25	3.11111111111111	.222222222222222	.444444444444444	.333333333333333	.259259259259259	9	6	9	0	1
1008790	0	14.5023956194387	3	2	4	-.357486860922845	2.27272727272727	3	2.22222222222222	.481481481481481	.481481481481481	.185185185185185	.037037037037037	9	6	9	0	1
1008120	1	13.2292950034223	3	3	4	-.352629610482406	3	3.375	2.22222222222222	.703703703703704	.888888888888889	.962962962962963	.814814814814815	9	9	9	0	1
1011770	0	13.1964407939767	5	5	4	-.350323115616345	3	3.625	2.61111111111111	.407407407407407	.555555555555556	.62962962962963	.37037037037037	12	12	12	0	1
1010020	0	13.201916495551	5	5	3	-.350213567179487	2.63636363636364	4.25	2.22222222222222	.296296296296296	.481481481481481	.407407407407407	.148148148148148	12	12	12	0	1
1005600	0	13.388090349076	3	6	2	-.349308929330957	4.36363636363636	3.125	2.5	.481481481481481	.740740740740741	.37037037037037	.52	9	15	15	0	1
1008880	1	13.5660506502396	3	2	5	-.344035677241485	2.81818181818182	3.625	3.27777777777778	.740740740740741	.555555555555556	.592592592592593	99	9	6	9	0	1
1012030	0	13.7987679671458	1	1	4	-.3408945713168	1.63636363636364	1.875	2.11111111111111	.592592592592593	99	.777777777777778	.851851851851852	0	0	0	0	1
1010780	0	13.3826146475017	3	3	3	-.338375718508397	4.36363636363636	4	3.88888888888889	.222222222222222	.518518518518518	1.03703703703704	.333333333333333	9	9	9	0	1
1012300	0	12.9034907597536	6	3	2	-.336445443660278	4.27272727272727	3.375	2.94444444444444	.296296296296296	.222222222222222	.37037037037037	.518518518518518	15	9	15	0	1
1009160	0	99	3	3	3	-.333673860599269	3.27272727272727	3.875	2.44444444444444	.925925925925926	.851851851851852	99	99	9	9	9	0	1
1009240	1	99	3	4	3	-.332611086991147	3.90909090909091	3.75	2.83333333333333	.518518518518518	.407407407407407	.444444444444444	.296296296296296	9	12	12	0	1
1008480	1	13.2292950034223	5	5	5	-.332165942880257	3.5	3.125	2.88888888888889	.185185185185185	.925925925925926	.851851851851852	.592592592592593	12	12	12	0	1
1011750	0	99	5	5	2	-.330746244606832	2.63636363636364	3.5	1.66666666666667	1.96296296296296	1.62962962962963	1.55555555555556	1.48148148148148	12	12	12	0	1
1011510	1	12.7118412046543	3	3	3	-.327610703557355	4.27272727272727	3.75	2.22222222222222	.740740740740741	.444444444444444	.814814814814815	.222222222222222	9	9	9	0	1
1010390	0	13.8699520876112	3	2	3	-.316239800506965	3.45454545454545	3	3.11111111111111	.444444444444444	.444444444444444	.555555555555556	.407407407407407	9	6	9	0	1
1009860	0	99	2	2	3	-.314123396251106	2.90909090909091	3.25	1.88888888888889	.555555555555556	.555555555555556	.481481481481481	.888888888888889	6	6	6	0	1
1010030	1	12.3422313483915	3	2	4	-.310933194046357	3.72727272727273	4.125	2.61111111111111	.37037037037037	.407407407407407	.259259259259259	.333333333333333	9	6	9	0	1
1010580	1	12.5612594113621	3	3	2	-.31000070697306	2.72727272727273	2.25	4.27777777777778	.666666666666667	1.33333333333333	.444444444444444	99	9	9	9	0	1
1010190	1	13.0513347022587	3	3	3	-.303299862700143	3	2.375	2.61111111111111	.296296296296296	.444444444444444	.555555555555556	99	9	9	9	0	1
1007820	1	12.8350444900753	5	3	5	-.300162792789651	3.54545454545455	3.875	2.5	.481481481481481	.703703703703704	.666666666666667	.444444444444444	12	9	12	0	1
1005990	0	15.8740588637919	3	2	2	-.299701895615424	3.09090909090909	3.625	2.11111111111111	.481481481481481	.962962962962963	.62962962962963	.555555555555556	9	6	9	0	1
1011630	1	12.9226557152635	3	3	3	-.299121121569993	3.18181818181818	2.25	2.94444444444444	.481481481481481	1.07692307692308	.888888888888889	.481481481481481	9	9	9	0	1
1005830	0	12.6187542778919	5	5	3	-.298380577230966	3	3.125	2.27777777777778	.962962962962963	1.33333333333333	1.14814814814815	1.03703703703704	12	12	12	0	1
1012270	0	12.5557837097878	2	5	3	-.293415207616882	2.72727272727273	3.125	2.72222222222222	.481481481481481	.625	.666666666666667	.777777777777778	6	12	12	0	1
1005770	0	12.788501026694	5	5	2	-.290386189601288	3.90909090909091	4	2.88888888888889	.518518518518518	.37037037037037	.592592592592593	.259259259259259	12	12	12	0	1
1005640	0	13.4893908281999	3	3	3	-.287641034967458	3.63636363636364	2.75	2.83333333333333	.555555555555556	.592592592592593	.62962962962963	.444444444444444	9	9	9	0	1
1011060	1	12.8843258042437	6	3	5	-.286019681838511	2	3.5	1.77777777777778	.185185185185185	.037037037037037	.0740740740740741	.62962962962963	15	9	15	0	1
1008820	0	13.3716632443532	5	3	2	-.285992009483059	3.81818181818182	3.375	3.33333333333333	.518518518518518	.777777777777778	.444444444444444	.777777777777778	12	9	12	0	1
1011390	1	13.45106091718	3	3	5	-.28359761353133	3.72727272727273	2.5	2.44444444444444	.222222222222222	.185185185185185	.111111111111111	.0740740740740741	9	9	9	0	1
1009110	1	13.2128678986995	3	3	4	-.281156352533945	4.09090909090909	4.25	2.16666666666667	.296296296296296	.111111111111111	.185185185185185	.296296296296296	9	9	9	0	1
1009980	0	14.0396988364134	3	3	3	-.281090350114941	2	3	3	.259259259259259	.333333333333333	.37037037037037	99	9	9	9	0	1
1010220	0	13.3360711841205	5	5	3	-.280052911529215	3.45454545454545	3.75	3	.407407407407407	.37037037037037	.259259259259259	.222222222222222	12	12	12	0	1
1011430	1	12.3203285420945	3	3	3	-.27822061609014	3.18181818181818	3.375	2.11111111111111	.925925925925926	.62962962962963	1.11111111111111	1.33333333333333	9	9	9	0	1
1008540	1	99	3	1	2	-.274965912925893	2.63636363636364	3.375	2.44444444444444	.185185185185185	.555555555555556	.518518518518518	.407407407407407	9	0	9	0	1
1010230	1	13.9000684462697	4	3	4	-.274123512094545	3.63636363636364	3.125	2.5	.814814814814815	.703703703703704	1	99	12	9	12	0	1
1011860	0	12.3477070499658	3	3	3	-.273804083061297	3.72727272727273	4	2.77777777777778	.333333333333333	.407407407407407	.592592592592593	.703703703703704	9	9	9	0	1
1011040	1	13.2950034223135	2	2	3	-.272456439286019	3.09090909090909	4	4.05555555555556	.555555555555556	.37037037037037	.62962962962963	.703703703703704	6	6	6	0	1
1008130	0	14.2286105407255	3	1	4	-.270731105994447	2.45454545454545	2.375	3.58823529411765	.444444444444444	.444444444444444	.888888888888889	99	9	0	9	0	1
1010850	0	13.7932922655715	4	3	4	-.269106652138985	3.45454545454545	4.875	1.5	.346153846153846	.111111111111111	.407407407407407	.037037037037037	12	9	12	0	1
1010490	0	12.9199178644764	5	5	2	-.264102527743855	4.18181818181818	4.5	3.22222222222222	.407407407407407	.222222222222222	.148148148148148	.111111111111111	12	12	12	0	1
1005880	1	13.4182067077344	3	3	3	-.26335489155176	3.81818181818182	4.75	1.61111111111111	.296296296296296	.407407407407407	.407407407407407	.444444444444444	9	9	9	0	1
1010270	1	13.8206707734428	3	1	3	-.26294754889317	4.36363636363636	3.75	2.22222222222222	.222222222222222	.111111111111111	.148148148148148	.259259259259259	9	0	9	0	1
1009040	1	12.0766598220397	2	2	3	-.261083826652155	1.90909090909091	4.5	1.44444444444444	.962962962962963	.888888888888889	.333333333333333	.740740740740741	6	6	6	0	1
1010210	0	12.5420944558522	2	3	3	-.258509642977635	3.36363636363636	3.5	2.22222222222222	.259259259259259	.259259259259259	.148148148148148	.259259259259259	6	9	9	0	1
1011290	1	14.1492128678987	3	3	3	-.253724637129776	3.27272727272727	2.625	2.77777777777778	.666666666666667	.407407407407407	.259259259259259	.333333333333333	9	9	9	0	1
1011560	1	13.6673511293635	3	2	5	-.253597481129679	3.36363636363636	2.875	2.11111111111111	.259259259259259	.444444444444444	.333333333333333	.444444444444444	9	6	9	0	1
1008270	0	12.8624229979466	5	3	3	-.24410588834759	4	4.25	4.44444444444444	.576923076923077	.444444444444444	.592592592592593	.592592592592593	12	9	12	0	1
1008510	1	14.9979466119097	3	2	4	-.240827706364017	3.54545454545455	2.75	2.61111111111111	.037037037037037	.185185185185185	.148148148148148	.259259259259259	9	6	9	0	1
1005710	0	13.3579739904175	3	5	3	-.237723064306762	3.36363636363636	1.625	3	.333333333333333	99	.703703703703704	99	9	12	12	0	1
1011840	1	12.9089664613279	4	3	4	-.232964659845111	3.90909090909091	3.75	2.27777777777778	.37037037037037	.518518518518518	.555555555555556	.666666666666667	12	9	12	0	1
1006260	0	13.9931553730322	4	4	3	-.232268668636727	3.54545454545455	3.75	1.94444444444444	.259259259259259	.407407407407407	.555555555555556	.111111111111111	12	12	12	0	1
1007780	1	13.2867898699521	3	2	4	-.229928397766672	4.27272727272727	4.125	2.77777777777778	.576923076923077	.962962962962963	.925925925925926	.851851851851852	9	6	9	0	1
1007890	1	12.8021902806297	2	3	3	-.222879766754329	3.18181818181818	4.125	2.27777777777778	.407407407407407	.481481481481481	.777777777777778	.62962962962963	6	9	9	0	1
1009400	1	13.4537987679671	2	2	3	-.220367614347891	3.72727272727273	2	2.44444444444444	1.22222222222222	.851851851851852	.777777777777778	99	6	6	6	0	1
1011810	1	12.9062286105407	3	3	3	-.22012732065434	3.45454545454545	2.5	3.33333333333333	.814814814814815	.777777777777778	.481481481481481	.62962962962963	9	9	9	0	1
1008550	1	13.6892539356605	3	3	3	-.217552012859945	3	3.875	2.88888888888889	.185185185185185	1.14814814814815	.846153846153846	.814814814814815	9	9	9	0	1
1007530	0	12.3613963039014	5	3	3	-.214584530571287	2.90909090909091	3	2.88888888888889	.703703703703704	.555555555555556	1.14814814814815	99	12	9	12	0	1
1005400	0	14.1820670773443	2	2	3	-.212862367595176	2.81818181818182	2	2.5	.851851851851852	.925925925925926	.814814814814815	.777777777777778	6	6	6	0	1
1010040	0	14.5270362765229	3	2	4	-.212292324937156	3.18181818181818	3.125	3.11111111111111	.740740740740741	1	1.03703703703704	1.18518518518519	9	6	9	0	1
1008950	1	12.208076659822	3	2	5	-.208193396461613	2.54545454545455	4.5	2.16666666666667	.0740740740740741	.259259259259259	.0740740740740741	.185185185185185	9	6	9	0	1
1011830	1	12.8377823408624	3	3	3	-.206957653631192	3.45454545454545	1.25	4.5	.666666666666667	1	99	.703703703703704	9	9	9	0	1
1010520	0	13.3497604380561	2	5	4	-.203069416686033	2.81818181818182	3.625	2.22222222222222	.407407407407407	.708333333333333	.814814814814815	.555555555555556	6	12	12	0	1
1008990	1	13.2511978097194	5	5	4	-.20187928415681	2.63636363636364	2.875	2.83333333333333	1.11111111111111	.814814814814815	.925925925925926	.888888888888889	12	12	12	0	1
1005820	1	13.927446954141	3	2	4	-.201123746652611	2.09090909090909	3.75	1.94444444444444	.592592592592593	.37037037037037	.296296296296296	.333333333333333	9	6	9	0	1
1006100	0	12.974674880219	5	8	3	-.196954577185195	3.54545454545455	3.75	2.83333333333333	.703703703703704	1.11111111111111	.925925925925926	.666666666666667	12	19	19	0	1
1006500	1	14.5544147843943	2	2	3	-.191346296381561	2.09090909090909	1	3.94444444444444	.925925925925926	.777777777777778	.777777777777778	.814814814814815	6	6	6	0	1
1007660	1	12.8323066392882	3	2	4	-.187174610068893	2.18181818181818	2.25	2.55555555555556	.740740740740741	1.18518518518519	.888888888888889	.846153846153846	9	6	9	0	1
1011600	1	13.7275838466804	2	2	3	-.185169764050187	3.27272727272727	4.75	2.66666666666667	.666666666666667	.518518518518518	.62962962962963	.259259259259259	6	6	6	0	1
1009170	1	12.974674880219	2	2	5	-.18304390608226	2.63636363636364	2.5	2.5	.592592592592593	.407407407407407	.62962962962963	.666666666666667	6	6	6	0	1
1005340	0	13.4674880219028	6	6	2	-.182618843324272	3	2.375	2.33333333333333	.444444444444444	.44	99	99	15	15	15	0	1
1008010	0	12.476386036961	5	2	4	-.173471719807877	4.36363636363636	4.375	3.16666666666667	1.07407407407407	1.03703703703704	.518518518518518	1.03703703703704	12	6	12	0	1
1009300	0	13.1854893908282	3	5	3	-.170611413181986	3.09090909090909	3.125	3.55555555555556	.851851851851852	1.16	1	.888888888888889	9	12	12	0	1
1010100	1	12.6351813826146	3	3	3	-.162646961175894	3.72727272727273	3.5	2.16666666666667	.666666666666667	.740740740740741	1	.888888888888889	9	9	9	0	1
1011340	1	12.3668720054757	3	3	4	-.161247103932158	3.72727272727273	3.625	3.11111111111111	.777777777777778	.851851851851852	1.07407407407407	1	9	9	9	0	1
1011310	1	11.9863107460643	3	2	4	-.159269706189596	2.36363636363636	2.5	2.16666666666667	.555555555555556	.518518518518518	.555555555555556	.555555555555556	9	6	9	0	1
1009850	0	12.5092402464066	5	3	3	-.150160181431066	2.54545454545455	2.875	2.16666666666667	.296296296296296	.333333333333333	.296296296296296	.481481481481481	12	9	12	0	1
1005610	0	13.4428473648186	6	5	4	-.141808541088024	4.27272727272727	4	1.88888888888889	.592592592592593	1.11111111111111	.962962962962963	.925925925925926	15	12	15	0	1
1005780	0	13.1170431211499	2	3	4	-.140112237512837	4.09090909090909	2.875	3.94444444444444	.37037037037037	.407407407407407	.666666666666667	.518518518518518	6	9	9	0	1
1007920	0	13.5195071868583	3	3	4	-.140060924911696	3	2.625	3.77777777777778	.777777777777778	1.18518518518519	.925925925925926	.777777777777778	9	9	9	0	1
1006960	0	13.5249828884326	4	3	3	-.139628698876765	2.90909090909091	3.25	2	.222222222222222	.259259259259259	.259259259259259	.347826086956522	12	9	12	0	1
1011710	1	13.0458590006845	5	3	2	-.139421542420586	2.63636363636364	3.375	1.22222222222222	.111111111111111	.111111111111111	.259259259259259	.0740740740740741	12	9	12	0	1
1009140	0	12.7446954140999	3	3	4	-.138952236061754	1	2.5	4.33333333333333	.814814814814815	.703703703703704	.37037037037037	.481481481481481	9	9	9	0	1
1008960	0	12.4599589322382	4	4	3	-.138826734140853	2.81818181818182	3.25	2.22222222222222	.481481481481481	.666666666666667	.851851851851852	.555555555555556	12	12	12	0	1
1010560	0	12.3641341546886	3	3	3	-.138415734025779	3.36363636363636	4.375	3.11111111111111	.807692307692308	1.11538461538462	1.15384615384615	.703703703703704	9	9	9	0	1
1006320	0	12.6981519507187	2	5	2	-.136924281383339	3.45454545454545	1.625	4.77777777777778	1.14814814814815	99	99	99	6	12	12	0	1
1008890	1	13.3388090349076	3	3	3	-.134197617312487	4	4	2.5	.37037037037037	.222222222222222	.444444444444444	.518518518518518	9	9	9	0	1
1008760	0	11.1129363449692	3	3	3	-.127633361707606	3.90909090909091	2	4.22222222222222	.703703703703704	.888888888888889	.777777777777778	.851851851851852	9	9	9	0	1
1010330	0	13.6098562628337	3	3	3	-.126764665039587	2.63636363636364	4	3.82352941176471	.222222222222222	.0740740740740741	.259259259259259	.444444444444444	9	9	9	0	1
1010250	1	13.3278576317591	3	3	3	-.12586090275481	3.81818181818182	3.625	2.05882352941176	.222222222222222	.703703703703704	.407407407407407	.592592592592593	9	9	9	0	1
1006210	1	13.7275838466804	3	3	3	-.125721277618156	2.72727272727273	3.375	2.72222222222222	.384615384615385	.333333333333333	.518518518518518	.37037037037037	9	9	9	0	1
1010570	1	12.8952772073922	3	3	3	-.121473246850481	2.45454545454545	2.625	2.5	.592592592592593	.703703703703704	.592592592592593	.576923076923077	9	9	9	0	1
1011500	1	12.1505817932923	5	3	3	-.117198248453238	3.63636363636364	3.75	2	.0740740740740741	.0740740740740741	.333333333333333	.111111111111111	12	9	12	0	1
1008900	0	12.2847364818617	3	3	3	-.116540236498347	2.36363636363636	2.625	2.66666666666667	.185185185185185	.0740740740740741	0	.111111111111111	9	9	9	0	1
1006120	1	14.3846680355921	2	2	3	-.113035865264147	3.27272727272727	4.25	2.05555555555556	.576923076923077	.481481481481481	.407407407407407	.222222222222222	6	6	6	0	1
1005740	0	13.4236824093087	3	3	3	-.106738871957604	3.18181818181818	3.375	3.38888888888889	.296296296296296	.259259259259259	.185185185185185	.185185185185185	9	9	9	0	1
1005860	0	13.6208076659822	3	2	3	-.104381770347804	2.90909090909091	3.42857142857143	2.61111111111111	.62962962962963	.555555555555556	.777777777777778	.740740740740741	9	6	9	0	1
1010180	1	12.1806981519507	3	3	3	-.102348507780745	3.27272727272727	2.5	3.94444444444444	.62962962962963	.296296296296296	.296296296296296	.296296296296296	9	9	9	0	1
1007600	0	13.4455852156058	3	2	4	-.0892865983127114	3.54545454545455	2.875	2.94444444444444	1.07407407407407	1.11111111111111	.851851851851852	.37037037037037	9	6	9	0	1
1006300	1	12.8980150581793	3	3	3	-.0889648731864541	4.63636363636364	4	2.05555555555556	.37037037037037	.111111111111111	.0740740740740741	.115384615384615	9	9	9	0	1
1011820	0	12.6269678302533	3	3	3	-.0847115962141798	3	3.875	1.77777777777778	.259259259259259	99	.222222222222222	.259259259259259	9	9	9	0	1
1006330	0	13.1115674195756	99	99	3	-.0833519142996208	4.18181818181818	4.14285714285714	2.27777777777778	.259259259259259	.148148148148148	.222222222222222	.111111111111111	99	99	99	0	1
1005900	1	12.7748117727584	4	5	4	-.078607430813345	4.45454545454545	3	2.82352941176471	.481481481481481	.703703703703704	.481481481481481	.185185185185185	12	12	12	0	1
1005530	0	13.7056810403833	2	3	3	-.0764974284092079	4	3.625	3.83333333333333	.37037037037037	.115384615384615	.296296296296296	.230769230769231	6	9	9	0	1
1011130	0	12.8788501026694	3	3	3	-.0752045362163201	3.54545454545455	3.25	2.61111111111111	.259259259259259	.185185185185185	.222222222222222	.111111111111111	9	9	9	0	1
1006660	1	13.3333333333333	2	3	3	-.0736262098302653	3.36363636363636	3.5	3.72222222222222	.259259259259259	.296296296296296	.555555555555556	.407407407407407	6	9	9	0	1
1009020	1	12.2135523613963	3	2	3	-.0734425638936669	3.72727272727273	4.375	2.94444444444444	1.25925925925926	.888888888888889	.814814814814815	.481481481481481	9	6	9	0	1
1010430	1	11.6741957563313	5	5	3	-.0720398749067731	3.72727272727273	4.5	1.66666666666667	.407407407407407	.62962962962963	.592592592592593	.925925925925926	12	12	12	0	1
1007540	0	12.3997262149213	3	2	4	-.0677026924633781	2.45454545454545	2.375	3.27777777777778	.666666666666667	.481481481481481	.333333333333333	.111111111111111	9	6	9	0	1
1006840	1	12.8843258042437	3	3	3	-.0609613131260706	4	3.625	3.11111111111111	.222222222222222	.814814814814815	.740740740740741	.592592592592593	9	9	9	0	1
1007680	1	13.8535249828884	2	2	3	-.0597295484706241	2.63636363636364	2.5	4.5	.703703703703704	.37037037037037	.407407407407407	.296296296296296	6	6	6	0	1
1010090	1	12.1122518822724	3	3	3	-.0592530681152874	4.27272727272727	4	2.94444444444444	.555555555555556	.37037037037037	.592592592592593	.592592592592593	9	9	9	0	1
1007860	1	99	3	3	3	-.0580987428097953	3.54545454545455	5	1.77777777777778	.148148148148148	.62962962962963	.653846153846154	.407407407407407	9	9	9	0	1
1011700	0	12.8213552361396	3	3	4	-.0573829228279957	3.45454545454545	3.625	3.22222222222222	.518518518518518	.0740740740740741	.923076923076923	.185185185185185	9	9	9	0	1
1005730	0	12.5311430527036	3	3	2	-.055708983883218	3.54545454545455	3.625	3.5	.518518518518518	99	99	99	9	9	9	0	1
1007990	0	13.3251197809719	3	2	4	-.0544486840580827	3.81818181818182	4.25	2.44444444444444	1.18518518518519	1.07407407407407	1	.333333333333333	9	6	9	0	1
1008060	1	12.2108145106092	6	5	3	-.0517626947015209	4.27272727272727	5	1.44444444444444	.481481481481481	.62962962962963	.296296296296296	1.26923076923077	15	12	15	0	1
1010130	1	12.2409308692676	4	3	3	-.0500139818228487	3.09090909090909	3.875	1.88888888888889	.444444444444444	.666666666666667	1.37037037037037	1.11111111111111	12	9	12	0	1
1009580	1	11.9561943874059	2	2	5	-.0498523481013709	2.72727272727273	2.25	2.16666666666667	.740740740740741	.962962962962963	1.25925925925926	1.33333333333333	6	6	6	0	1
1011260	1	12.5338809034908	3	5	2	-.0474492979135994	3.27272727272727	4.125	2.55555555555556	.444444444444444	.555555555555556	.481481481481481	.518518518518518	9	12	12	0	1
1009220	0	12.6570841889117	3	3	2	-.0465990720905979	3.90909090909091	4.375	3.66666666666667	.222222222222222	.444444444444444	.555555555555556	.259259259259259	9	9	9	0	1
1010480	1	13.1690622861054	3	4	3	-.0331588216787934	3.54545454545455	4.125	2.11111111111111	.148148148148148	.148148148148148	.148148148148148	.111111111111111	9	12	12	0	1
1008720	0	14.2614647501711	2	99	99	-.0309100348817937	2.27272727272727	2.57142857142857	3.05882352941176	.592592592592593	.851851851851852	.730769230769231	.444444444444444	6	99	99	0	1
1006540	0	13.8042436687201	2	2	3	-.0236122059145409	2.27272727272727	3	3.11111111111111	.518518518518518	.814814814814815	1.07407407407407	.576923076923077	6	6	6	0	1
1009080	0	12.3175906913073	3	3	3	-.0213557012357306	3.45454545454545	4.625	1.55555555555556	.333333333333333	.153846153846154	.148148148148148	.111111111111111	9	9	9	0	1
1007980	1	12.7091033538672	3	2	3	-.0120363066233318	3.90909090909091	3.5	2.72222222222222	.407407407407407	.518518518518518	.444444444444444	.296296296296296	9	6	9	0	1
1007880	0	13.0924024640657	3	2	3	-.0099715297278756	3	3.125	1.83333333333333	.407407407407407	.62962962962963	.777777777777778	.296296296296296	9	6	9	0	1
1007290	1	12.8843258042437	3	3	3	-.00996290489146652	3.45454545454545	4	2.11111111111111	.62962962962963	.851851851851852	1.23076923076923	.592592592592593	9	9	9	0	1
1010380	1	12.1259411362081	5	3	4	-.00898166161818345	3.81818181818182	3.125	2.88888888888889	.407407407407407	.444444444444444	.666666666666667	.407407407407407	12	9	12	0	1
1009550	1	13.8590006844627	5	3	5	-.00598181817603801	4.09090909090909	4.125	2	.407407407407407	.222222222222222	.259259259259259	.148148148148148	12	9	12	0	1
1007750	0	12.4626967830253	3	3	3	-.00425720978863316	3.81818181818182	3.125	2.82352941176471	.222222222222222	.148148148148148	.259259259259259	.333333333333333	9	9	9	0	1
1006350	1	12.933607118412	4	3	1	-.00218386900753195	3.09090909090909	3.75	2.16666666666667	.222222222222222	.185185185185185	.148148148148148	.407407407407407	12	9	12	0	1
1005650	1	12.2710472279261	5	3	3	-.000265620931755623	2	1.125	4.11111111111111	.555555555555556	.740740740740741	.962962962962963	.814814814814815	12	9	12	0	1
1009030	0	12.4681724845996	3	3	3	.000222584260741906	3.81818181818182	2.5	4	.481481481481481	.851851851851852	.962962962962963	1.03703703703704	9	9	9	0	1
1009120	0	13.2073921971253	3	2	5	.00169552780185458	3.63636363636364	4.75	1.5	.814814814814815	.925925925925926	1.03703703703704	1	9	6	9	0	1
1006380	1	13.242984257358	3	2	3	.00274551840274685	3.54545454545455	4.375	2.55555555555556	.148148148148148	.259259259259259	.0740740740740741	.222222222222222	9	6	9	0	1
1011000	1	14.4010951403149	5	3	5	.00452055380083487	3	4.125	1.77777777777778	.222222222222222	.259259259259259	.111111111111111	.407407407407407	12	9	12	0	1
1008020	1	13.6427104722793	5	2	2	.0079627062362007	4	4	2.72222222222222	.481481481481481	.37037037037037	.444444444444444	.481481481481481	12	6	12	0	1
1011370	0	13.5441478439425	5	3	3	.0119618948470558	2.63636363636364	2.875	3.72222222222222	.37037037037037	.37037037037037	.62962962962963	.592592592592593	12	9	12	0	1
1006190	0	99	5	3	2	.0140472250664487	3.81818181818182	3.625	2.77777777777778	.185185185185185	.222222222222222	.444444444444444	99	12	9	12	0	1
1010070	1	13.9055441478439	6	2	3	.0196766226009768	2.63636363636364	3	2.38888888888889	.259259259259259	.444444444444444	.185185185185185	.444444444444444	15	6	15	0	1
1008860	0	12.4791238877481	5	3	3	.022262700771733	3	4	1.94444444444444	.740740740740741	.814814814814815	.37037037037037	.555555555555556	12	9	12	0	1
1010010	1	12.8514715947981	2	2	3	.0244033646971246	3.09090909090909	4.125	1.16666666666667	.777777777777778	.407407407407407	.666666666666667	.592592592592593	6	6	6	0	1
1011270	0	13.0924024640657	3	3	3	.0273904363660385	2.72727272727273	3	2.27777777777778	.222222222222222	.0740740740740741	.259259259259259	.185185185185185	9	9	9	0	1
1009060	1	12.7474332648871	2	3	3	.0310913324829367	4.63636363636364	4.625	2.22222222222222	.555555555555556	.259259259259259	.222222222222222	.407407407407407	6	9	9	0	1
1010120	0	12.9253935660507	3	3	3	.048779738983423	2.63636363636364	3.875	2.44444444444444	.296296296296296	.481481481481481	.407407407407407	.481481481481481	9	9	9	0	1
1009070	0	13.7850787132101	3	3	4	.0499012614104563	3.54545454545455	4	3.77777777777778	.814814814814815	.666666666666667	.481481481481481	.925925925925926	9	9	9	0	1
1010940	1	13.0869267624914	3	3	3	.0503369576145378	3.45454545454545	3.375	2	.148148148148148	.592592592592593	.259259259259259	.222222222222222	9	9	9	0	1
1006070	1	13.0184804928131	2	2	3	.0530751201562441	3.36363636363636	4.875	3.16666666666667	.962962962962963	.851851851851852	.481481481481481	.407407407407407	6	6	6	0	1
1005570	1	12.3285420944559	3	3	3	.0541838582792299	2.36363636363636	2.625	2.77777777777778	.259259259259259	.481481481481481	.407407407407407	.296296296296296	9	9	9	0	1
1005690	0	13.0677618069815	3	5	4	.054315580471922	4	4.125	2.77777777777778	.481481481481481	.185185185185185	.259259259259259	.259259259259259	9	12	12	0	1
1010530	1	13.2731006160164	3	3	5	.0576651867034215	3.09090909090909	2.5	2.94444444444444	.555555555555556	.814814814814815	.407407407407407	.37037037037037	9	9	9	0	1
1010610	0	13.7111567419576	2	3	5	.0607370331389982	3.27272727272727	3	3.16666666666667	.333333333333333	.444444444444444	.444444444444444	.296296296296296	6	9	9	0	1
1011490	0	12.8432580424367	3	3	2	.0628805970832137	1.90909090909091	3	1.77777777777778	.333333333333333	.444444444444444	.407407407407407	.37037037037037	9	9	9	0	1
1005350	1	13.968514715948	3	3	3	.0651880943757327	2.81818181818182	3.375	2.88888888888889	.62962962962963	.703703703703704	.740740740740741	.592592592592593	9	9	9	0	1
1005470	1	12.4079397672827	5	5	1	.0665899894967924	4.36363636363636	4.125	1.72222222222222	.555555555555556	.333333333333333	.269230769230769	.37037037037037	12	12	12	0	1
1010910	1	12.1943874058864	2	3	3	.0671186726315537	3.09090909090909	3.375	2.11111111111111	.37037037037037	.259259259259259	.0384615384615385	.296296296296296	6	9	9	0	1
1006060	0	99	5	3	3	.0709438724175126	3.1	3.375	1.94444444444444	.62962962962963	.444444444444444	.296296296296296	.333333333333333	12	9	12	0	1
1011570	1	99	3	5	4	.0829784161090908	2.81818181818182	4	2.22222222222222	.444444444444444	.518518518518518	.555555555555556	.481481481481481	9	12	12	0	1
1008500	1	12.5667351129363	5	5	3	.0890768362804256	3.09090909090909	4.625	2.55555555555556	.148148148148148	.407407407407407	.444444444444444	.222222222222222	12	12	12	0	1
1008770	0	13.4045174537988	2	2	3	.0960464466804982	4.63636363636364	2.125	3	.62962962962963	.666666666666667	.444444444444444	.333333333333333	6	6	6	0	1
1006240	0	13.0212183436003	3	3	1	.0965101614202955	4.54545454545455	4.375	2.22222222222222	.333333333333333	.296296296296296	.333333333333333	.481481481481481	9	9	9	0	1
1009000	0	13.7275838466804	2	3	4	.0994319815150681	3.27272727272727	2.75	3	.777777777777778	1.11111111111111	1.11111111111111	1.03703703703704	6	9	9	0	1
1006000	0	12.0383299110198	5	3	3	.100442978520064	3.90909090909091	4.625	1.61111111111111	.37037037037037	.481481481481481	.851851851851852	.148148148148148	12	9	12	0	1
1011480	0	14.009582477755	5	5	3	.102916696580933	3.36363636363636	4.125	3.72222222222222	.185185185185185	.111111111111111	.0740740740740741	.111111111111111	12	12	12	0	1
1009230	0	12.7036276522929	3	3	4	.117165522155584	3.72727272727273	4	2.38888888888889	0	0	99	0	9	9	9	0	1
1011690	1	12.3285420944559	3	2	4	.12143279123461	4.09090909090909	4.75	2.27777777777778	.259259259259259	.444444444444444	.592592592592593	.444444444444444	9	6	9	0	1
1005720	1	12.435318275154	5	2	3	.123267270920912	3	4.14285714285714	2	.481481481481481	.481481481481481	.777777777777778	.703703703703704	12	6	12	0	1
1011680	0	13.2183436002738	3	5	3	.124707388113927	3.90909090909091	4	2.61111111111111	.703703703703704	.962962962962963	.407407407407407	.925925925925926	9	12	12	0	1
1005960	1	12.1204654346338	2	3	2	.125744382784001	3.54545454545455	3.625	3.16666666666667	.777777777777778	.259259259259259	.333333333333333	.518518518518518	6	9	9	0	1
1006460	1	12.3285420944559	2	1	4	.128358057606465	3.72727272727273	4.5	3.27777777777778	1	.851851851851852	.925925925925926	.962962962962963	6	0	6	0	1
1008090	1	11.9479808350445	3	2	4	.130368633115874	3	3	1.88888888888889	.740740740740741	.888888888888889	.851851851851852	.888888888888889	9	6	9	0	1
1009970	0	12.539356605065	3	3	3	.131828471902602	3.54545454545455	4	3.55555555555556	.222222222222222	.037037037037037	.148148148148148	.148148148148148	9	9	9	0	1
1010150	0	12.5831622176591	3	2	3	.132512817868056	3.18181818181818	3.25	3.55555555555556	.555555555555556	.62962962962963	99	.888888888888889	9	6	9	0	1
1007810	0	99	3	2	3	.132623262452103	3.54545454545455	2.625	3.61111111111111	.925925925925926	.851851851851852	1.03703703703704	.740740740740741	9	6	9	0	1
1010550	1	12.3011635865845	3	3	3	.134396240576653	3.27272727272727	2.75	2.33333333333333	.888888888888889	1.11111111111111	.851851851851852	.851851851851852	9	9	9	0	1
1010050	1	99	3	2	4	.137070347566478	3.90909090909091	4.25	2.38888888888889	.222222222222222	.518518518518518	.333333333333333	.814814814814815	9	6	9	0	1
1007960	0	12.788501026694	4	4	3	.138880802325967	3.18181818181818	3.375	2.33333333333333	.333333333333333	.592592592592593	.444444444444444	.296296296296296	12	12	12	0	1
1007940	1	12.6652977412731	5	3	3	.142743420924441	2.90909090909091	4.75	1.61111111111111	.703703703703704	.888888888888889	.444444444444444	.555555555555556	12	9	12	0	1
1007730	1	12.8815879534565	2	2	5	.142893666813929	4.18181818181818	3.25	2.16666666666667	.37037037037037	.111111111111111	.222222222222222	.703703703703704	6	6	6	0	1
1005790	1	13.0349075975359	3	3	3	.163513283584127	2.09090909090909	2.375	3	.851851851851852	.888888888888889	.888888888888889	1.40740740740741	9	9	9	0	1
1009320	1	13.7604380561259	3	3	3	.165633966970603	4.18181818181818	4.75	1.77777777777778	.62962962962963	.333333333333333	.222222222222222	.444444444444444	9	9	9	0	1
1011640	1	12.9993155373032	2	1	4	.166135132803191	1.63636363636364	1.625	3.72222222222222	.666666666666667	.962962962962963	.296296296296296	.888888888888889	6	0	6	0	1
1010300	1	13.0704996577687	2	2	4	.166402704634644	3.27272727272727	3	2.17647058823529	.259259259259259	.62962962962963	.62962962962963	.925925925925926	6	6	6	0	1
1007570	0	99	2	3	4	.167240861355938	4.09090909090909	2.25	3.55555555555556	1.07407407407407	.962962962962963	1.07407407407407	.925925925925926	6	9	9	0	1
1006130	0	12.5065023956194	3	3	2	.167255022719916	3.36363636363636	3.625	2.27777777777778	.296296296296296	.333333333333333	.333333333333333	.333333333333333	9	9	9	0	1
1009200	1	13.1937029431896	3	3	4	.169403117001816	2.81818181818182	3.125	3.55555555555556	.481481481481481	.555555555555556	.481481481481481	.37037037037037	9	9	9	0	1
1009840	0	12.7994524298426	4	4	2	.171294234902025	4.54545454545455	4.875	2	.0740740740740741	.37037037037037	.37037037037037	.185185185185185	12	12	12	0	1
1009180	1	15.8247775496235	3	99	4	.179127050438707	2.81818181818182	3.5	2.83333333333333	.5	.407407407407407	.407407407407407	.555555555555556	9	99	99	0	1
1009210	0	13.2813141683778	3	2	4	.179183237283024	2.90909090909091	3.625	1.88888888888889	0	.115384615384615	.148148148148148	.148148148148148	9	6	9	0	1
1006830	0	12.8898015058179	3	5	3	.196202155042264	2.72727272727273	4.75	3.22222222222222	.461538461538462	.481481481481481	.703703703703704	.296296296296296	9	12	12	0	1
1010000	0	12.8761122518823	3	3	2	.197829747466399	2.45454545454545	2.375	2.33333333333333	.888888888888889	.888888888888889	.592592592592593	.962962962962963	9	9	9	0	1
1006080	0	14.258726899384	5	5	2	.202697937972587	3.27272727272727	4.42857142857143	2.88888888888889	.814814814814815	.740740740740741	.740740740740741	.653846153846154	12	12	12	0	1
1011580	0	11.8165639972621	3	3	3	.204697170150744	4.09090909090909	3.875	2.72222222222222	.333333333333333	.148148148148148	.333333333333333	.037037037037037	9	9	9	0	1
1010410	1	12.3367556468172	3	2	4	.205238243727143	2.45454545454545	3.5	3.5	.407407407407407	.703703703703704	.888888888888889	.5	9	6	9	0	1
1005940	0	13.9876796714579	3	5	2	.216936730457092	3.72727272727273	3.5	2.55555555555556	.307692307692308	99	.296296296296296	.296296296296296	9	12	12	0	1
1007900	1	12.1587953456537	5	3	4	.217603176590679	4	2.75	1.55555555555556	.111111111111111	.62962962962963	.777777777777778	.851851851851852	12	9	12	0	1
1007800	1	12.7310061601643	5	3	4	.218157053867644	4.27272727272727	3.75	2.88888888888889	.592592592592593	.814814814814815	.962962962962963	1.03703703703704	12	9	12	0	1
1005580	0	13.2402464065708	7	7	3	.218495133712419	4	4.75	2	.259259259259259	.259259259259259	.185185185185185	.0740740740740741	16	16	16	0	1
1011330	0	12.2299794661191	2	3	4	.219705570140427	4.36363636363636	4.375	2.88888888888889	.259259259259259	.37037037037037	.407407407407407	.518518518518518	6	9	9	0	1
1010370	0	14.3080082135524	3	3	3	.221224808500276	4	4.75	3.72222222222222	.333333333333333	.444444444444444	.148148148148148	.296296296296296	9	9	9	0	1
1010470	1	13.6427104722793	2	2	3	.229661488967548	1.27272727272727	3.25	1.38888888888889	.925925925925926	.740740740740741	.518518518518518	.518518518518518	6	6	6	0	1
1006700	0	13.5112936344969	3	3	3	.235591622847889	4	4.25	2.83333333333333	.185185185185185	.333333333333333	.518518518518518	.296296296296296	9	9	9	0	1
1010440	0	12.5612594113621	4	2	4	.236553960971794	3.45454545454545	4.25	3.27777777777778	.592592592592593	.925925925925926	.851851851851852	.814814814814815	12	6	12	0	1
1006200	1	13.9000684462697	3	3	3	.23679222352638	3.09090909090909	3.75	2.83333333333333	.333333333333333	.518518518518518	.407407407407407	.592592592592593	9	9	9	0	1
1007630	1	12.3148528405202	2	2	4	.241092641764682	2.63636363636364	3	3	.814814814814815	1.22222222222222	.777777777777778	.740740740740741	6	6	6	0	1
1006600	0	14.1574264202601	3	3	2	.241681728621693	2.81818181818182	4.375	2.38888888888889	.592592592592593	.740740740740741	.703703703703704	.555555555555556	9	9	9	0	1
1009090	1	12.4845995893224	3	3	3	.24361556910131	3.09090909090909	4.125	1.83333333333333	.296296296296296	.333333333333333	.222222222222222	.333333333333333	9	9	9	0	1
1010260	0	13.9329226557153	3	2	3	.244511606241574	3	3.875	2.77777777777778	.259259259259259	.148148148148148	.481481481481481	.185185185185185	9	6	9	0	1
1009050	1	99	2	2	3	.24710497761123	2.27272727272727	4.625	1.22222222222222	.037037037037037	.111111111111111	.185185185185185	.148148148148148	6	6	6	0	1
1006530	0	11.8631074606434	5	5	4	.265378420705428	4.09090909090909	3.375	3.33333333333333	.407407407407407	.518518518518518	.37037037037037	.555555555555556	12	12	12	0	1
1007930	1	12.5338809034908	4	3	4	.271353356120801	3.18181818181818	3.25	3.55555555555556	.518518518518518	.592592592592593	.296296296296296	.703703703703704	12	9	12	0	1
1011790	1	12.9637234770705	4	3	4	.274471684568799	2.90909090909091	4.75	2.55555555555556	.37037037037037	.592592592592593	.481481481481481	99	12	9	12	0	1
1011760	0	13.7878165639973	5	3	3	.27455638997382	2.45454545454545	3	3.23529411764706	.962962962962963	.925925925925926	.814814814814815	.962962962962963	12	9	12	0	1
1006020	0	12.7775496235455	2	2	3	.276970816143331	3	3.375	2.83333333333333	.222222222222222	.222222222222222	.296296296296296	.111111111111111	6	6	6	0	1
1008710	0	12.4544832306639	3	3	3	.282522794891999	3	4	2.11111111111111	.703703703703704	.814814814814815	.407407407407407	.62962962962963	9	9	9	0	1
1006550	1	13.3716632443532	2	3	4	.284636166953938	4	2.875	2.33333333333333	.333333333333333	.259259259259259	.407407407407407	.296296296296296	6	9	9	0	1
1008730	1	13.3196440793977	3	3	3	.28772639432323	4.27272727272727	4.375	3.05555555555556	.481481481481481	.444444444444444	99	.37037037037037	9	9	9	0	1
1007690	0	13.4483230663929	2	2	5	.291484981431374	2.18181818181818	2.625	3.16666666666667	.148148148148148	.814814814814815	99	99	6	6	6	0	1
1008450	0	12.7419575633128	6	6	3	.292308735425683	3.54545454545455	4.375	1.88888888888889	.37037037037037	.518518518518518	.259259259259259	.518518518518518	15	15	15	0	1
1007580	0	13.1964407939767	2	2	3	.294806403950773	1.72727272727273	3.75	1.94444444444444	.296296296296296	99	99	99	6	6	6	0	1
1006270	0	13.6344969199179	2	3	5	.302694980730744	2.54545454545455	2.125	3	.740740740740741	.740740740740741	.846153846153846	.962962962962963	6	9	9	0	1
1011530	0	12.4599589322382	3	2	4	.306045411187886	2.72727272727273	2.25	3.33333333333333	.62962962962963	.518518518518518	.666666666666667	.62962962962963	9	6	9	0	1
1006450	1	14.1683778234086	2	3	3	.306167709260569	3.09090909090909	4.375	2.16666666666667	.814814814814815	.777777777777778	.703703703703704	.296296296296296	6	9	9	0	1
1005840	0	13.0841889117043	3	2	4	.314416199801148	3.81818181818182	2.75	2.41176470588235	.444444444444444	.296296296296296	.185185185185185	.384615384615385	9	6	9	0	1
1012310	1	13.3579739904175	3	5	4	.315753690372646	3.09090909090909	3.375	2.22222222222222	.407407407407407	.703703703703704	.518518518518518	.555555555555556	9	12	12	0	1
1011280	0	12.539356605065	2	2	4	.316021144533271	2.54545454545455	2.375	3.33333333333333	1.03703703703704	1.07407407407407	1.33333333333333	.851851851851852	6	6	6	0	1
1006780	1	12.5694729637235	3	3	3	.316673050306178	3	2.375	3.05555555555556	.962962962962963	.925925925925926	.925925925925926	.851851851851852	9	9	9	0	1
1008930	1	12.8815879534565	2	4	4	.319103833576496	3.54545454545455	3.75	2	.185185185185185	0	.296296296296296	.481481481481481	6	12	12	0	1
1004930	0	11.8576317590691	6	7	3	.320011356518072	3.45454545454545	3	1.77777777777778	.259259259259259	99	99	99	15	16	16	0	1
1007550	1	13.1143052703628	2	2	3	.331712270457935	3.09090909090909	3.375	3.61111111111111	.407407407407407	.555555555555556	.62962962962963	.666666666666667	6	6	6	0	1
1006610	1	13.3634496919918	5	3	3	.34171142860516	3.09090909090909	4.625	2.55555555555556	.333333333333333	.333333333333333	.333333333333333	.407407407407407	12	9	12	0	1
1007840	1	13.1718001368925	3	2	4	.34790500359686	3.36363636363636	2.75	4	.925925925925926	1	.851851851851852	.444444444444444	9	6	9	0	1
1006620	1	14.7214236824093	3	2	3	.348082641049332	1.81818181818182	3.875	2.66666666666667	.37037037037037	.259259259259259	.185185185185185	.259259259259259	9	6	9	0	1
1011660	0	12.8323066392882	3	3	3	.352346743927434	4.27272727272727	3.625	2.27777777777778	.296296296296296	.222222222222222	0	.037037037037037	9	9	9	0	1
1006670	0	13.927446954141	3	3	4	.352736615358621	2.18181818181818	3	2.22222222222222	.481481481481481	.592592592592593	.518518518518518	.518518518518518	9	9	9	0	1
1011800	0	12.7145790554415	5	2	4	.35361892393023	2.18181818181818	3	2.33333333333333	.666666666666667	.925925925925926	.888888888888889	.925925925925926	12	6	12	0	1
1005660	1	12.4626967830253	3	3	3	.354092605661054	3.09090909090909	2.5	2.83333333333333	.592592592592593	.962962962962963	.777777777777778	.444444444444444	9	9	9	0	1
1011780	0	12.974674880219	3	1	3	.35539865190639	2.45454545454545	3	2.22222222222222	.888888888888889	.481481481481481	.481481481481481	.259259259259259	9	0	9	0	1
1010320	1	12.3504449007529	5	2	3	.366281373566965	3.63636363636364	3.25	3.5	1	1.48148148148148	1.07407407407407	1.37037037037037	12	6	12	0	1
1010960	0	13.6098562628337	3	2	5	.368889248522491	3.54545454545455	3.125	1.88888888888889	.222222222222222	.333333333333333	.518518518518518	.148148148148148	9	6	9	0	1
1010400	0	13.1526351813826	2	2	4	.376501728918238	3.09090909090909	2.375	3.33333333333333	.925925925925926	1.22222222222222	.703703703703704	.37037037037037	6	6	6	0	1
1007830	1	13.3771389459274	4	4	4	.378004263677717	3.18181818181818	3.625	2.38888888888889	.888888888888889	.777777777777778	.62962962962963	.703703703703704	12	12	12	0	1
1010310	0	13.264887063655	2	2	3	.37987631231464	3	2.875	2.66666666666667	.666666666666667	.851851851851852	.703703703703704	.653846153846154	6	6	6	0	1
1010350	0	11.8412046543463	3	5	3	.383109336846745	2.45454545454545	3.875	2.72222222222222	.444444444444444	.148148148148148	.037037037037037	.0740740740740741	9	12	12	0	1
1006590	1	14.9158110882957	3	1	2	.383416595979678	3.27272727272727	4	2.33333333333333	.296296296296296	.407407407407407	.333333333333333	.777777777777778	9	0	9	0	1
1005090	1	12.5995893223819	5	3	3	.387822036670822	4.18181818181818	4.875	2.83333333333333	.259259259259259	.296296296296296	.481481481481481	.407407407407407	12	9	12	0	1
1006850	0	13.347022587269	3	3	3	.396002228190461	4.63636363636364	5	3.83333333333333	.222222222222222	.481481481481481	.518518518518518	.296296296296296	9	9	9	0	1
1011550	1	13.4182067077344	3	3	3	.396724169987259	4.36363636363636	2.25	3.94444444444444	.777777777777778	.518518518518518	.62962962962963	.296296296296296	9	9	9	0	1
1010510	1	13.2210814510609	3	3	3	.397611895718831	2.63636363636364	2.71428571428571	2.05555555555556	.666666666666667	1	.37037037037037	.296296296296296	9	9	9	0	1
1007560	0	13.1800136892539	2	3	4	.402208783466566	3.54545454545455	3.625	2.44444444444444	.333333333333333	.148148148148148	.185185185185185	.518518518518518	6	9	9	0	1
1011440	1	13.5605749486653	2	1	3	.407218449932044	3.45454545454545	3.875	2.5	.0740740740740741	.111111111111111	.333333333333333	.333333333333333	6	0	6	0	1
1006420	0	12.6242299794661	2	2	4	.410666012031826	3.45454545454545	3.625	3.05555555555556	.296296296296296	.407407407407407	.222222222222222	.259259259259259	6	6	6	0	1
1005700	0	12.9199178644764	3	3	3	.415723319212332	3.09090909090909	4	2.88888888888889	.37037037037037	.62962962962963	.962962962962963	.740740740740741	9	9	9	0	1
1010420	0	12.8843258042437	3	3	3	.416890993248119	2.36363636363636	2.875	2.11111111111111	.407407407407407	.296296296296296	.296296296296296	.444444444444444	9	9	9	0	1
1006580	0	12.6461327857632	3	2	4	.42543896336915	4.45454545454545	3.375	2.94444444444444	1.33333333333333	.962962962962963	.62962962962963	.925925925925926	9	6	9	0	1
1010240	0	12.8596851471595	3	5	3	.430128683707331	3.72727272727273	3.5	2.61111111111111	.296296296296296	.296296296296296	.222222222222222	.296296296296296	9	12	12	0	1
1006630	1	15.025325119781	2	2	3	.435399595619447	2.36363636363636	2.75	1.83333333333333	.481481481481481	.666666666666667	.37037037037037	1.07407407407407	6	6	6	0	1
1005560	0	13.1471594798084	3	3	4	.441319380703076	3.90909090909091	4.125	1.94444444444444	.592592592592593	.481481481481481	.740740740740741	.333333333333333	9	9	9	0	1
1010140	0	12.6817248459959	2	3	3	.442183299561966	2.36363636363636	2.75	2.38888888888889	.185185185185185	0	.037037037037037	.148148148148148	6	9	9	0	1
1011410	0	99	2	5	2	.44913586162313	3.90909090909091	3.875	2.94444444444444	.111111111111111	.740740740740741	.518518518518518	.518518518518518	6	12	12	0	1
1011730	0	13.2347707049966	5	5	3	.454031567631244	4.45454545454545	5	2.72222222222222	.125	.740740740740741	99	.37037037037037	12	12	12	0	1
1006680	1	12.7830253251198	5	3	4	.46282453845778	3.72727272727273	3.5	2.16666666666667	.444444444444444	.740740740740741	.826086956521739	.62962962962963	12	9	12	0	1
1006650	0	14.1848049281314	3	4	3	.463571159492206	3.36363636363636	2.625	4.22222222222222	1.11111111111111	1.11111111111111	.925925925925926	1.07407407407407	9	12	12	0	1
1007970	1	13.1444216290212	3	3	3	.464508464613254	2.81818181818182	4.25	1.88888888888889	.407407407407407	.185185185185185	.296296296296296	.296296296296296	9	9	9	0	1
1007950	1	15.4113620807666	3	3	3	.475662500116171	4.09090909090909	4	2.05555555555556	.444444444444444	.555555555555556	.851851851851852	.481481481481481	9	9	9	0	1
1005360	0	13.0130047912389	3	5	3	.479911295935539	3.54545454545455	4.25	2.77777777777778	.333333333333333	.185185185185185	.407407407407407	.333333333333333	9	12	12	0	1
1005290	0	13.2210814510609	3	3	3	.483534641948145	3.09090909090909	4.375	2.83333333333333	.296296296296296	.259259259259259	.32	.259259259259259	9	9	9	0	1
1005980	1	13.0677618069815	4	3	3	.488428311298003	3.54545454545455	5	2	.37037037037037	.592592592592593	.592592592592593	.555555555555556	12	9	12	0	1
1009990	0	12.290212183436	3	3	5	.490900881513807	4.63636363636364	3.57142857142857	4.11111111111111	.222222222222222	.769230769230769	.148148148148148	99	9	9	9	0	1
1005540	0	12.1998631074606	5	5	3	.498314411973188	4.81818181818182	4.25	2.44444444444444	.222222222222222	.185185185185185	.222222222222222	0	12	12	12	0	1
1006340	1	12.8733744010951	3	3	2	.505717195700923	4.45454545454545	4.75	1.94444444444444	.407407407407407	.777777777777778	.814814814814815	.444444444444444	9	9	9	0	1
1009150	0	13.7631759069131	3	3	4	.507348254382505	2.63636363636364	4.25	2.58823529411765	.481481481481481	.962962962962963	.777777777777778	.703703703703704	9	9	9	0	1
1011720	0	12.8213552361396	3	5	5	.514829677858887	4.27272727272727	4.75	2.88888888888889	.333333333333333	.555555555555556	.481481481481481	.592592592592593	9	12	12	0	1
1008050	1	12.4052019164956	3	3	4	.519314839840284	4.45454545454545	4.25	1.44444444444444	.592592592592593	1.03703703703704	.925925925925926	1.11111111111111	9	9	9	0	1
1006400	0	99	5	6	3	.521597975928914	4	4.5	3.16666666666667	.37037037037037	.153846153846154	.296296296296296	.185185185185185	12	15	15	0	1
1008830	1	11.4852840520192	3	3	4	.521994316178789	3.27272727272727	4.875	1.94444444444444	.111111111111111	.222222222222222	.333333333333333	.481481481481481	9	9	9	0	1
1008040	1	13.0020533880903	5	4	3	.528154728106887	3.09090909090909	4.75	1.61111111111111	.111111111111111	.407407407407407	.259259259259259	.555555555555556	12	12	12	0	1
1006510	1	15.5920602327173	3	2	4	.528937332114988	2.81818181818182	4.375	2.38888888888889	.481481481481481	.555555555555556	1.33333333333333	.666666666666667	9	6	9	0	1
1007740	0	11.62765229295	3	3	3	.538583815404457	3.72727272727273	4.625	2.05555555555556	.518518518518518	.666666666666667	.555555555555556	.333333333333333	9	9	9	0	1
1006250	0	12.9144421629021	3	3	4	.540852033301316	3.27272727272727	3.875	2.77777777777778	.185185185185185	.37037037037037	.666666666666667	.407407407407407	9	9	9	0	1
1010200	1	12.4544832306639	3	2	3	.544848280023933	3.72727272727273	4	1.77777777777778	.296296296296296	.148148148148148	.148148148148148	.444444444444444	9	6	9	0	1
1007760	1	13.1498973305955	6	6	4	.547086046960459	3.45454545454545	4.625	1.88888888888889	1	.814814814814815	.555555555555556	.777777777777778	15	15	15	0	1
1005390	0	12.2108145106092	3	3	3	.549277898425718	3	3.125	3.16666666666667	.296296296296296	.407407407407407	.111111111111111	.333333333333333	9	9	9	0	1
1006440	1	12.2327173169062	5	2	3	.555778007299342	3.63636363636364	4.5	2.61111111111111	.518518518518518	.666666666666667	.0740740740740741	.37037037037037	12	6	12	0	1
1004910	1	13.1553730321697	7	6	3	.557012576196016	4.63636363636364	4.25	3.38888888888889	.259259259259259	.407407407407407	.888888888888889	.62962962962963	16	15	16	0	1
1008080	1	12.2765229295003	5	5	3	.557126948984508	4.81818181818182	4.625	1.33333333333333	.222222222222222	.296296296296296	.518518518518518	.333333333333333	12	12	12	0	1
1007790	1	13.2731006160164	2	1	3	.560025513943627	2.09090909090909	2.25	3.22222222222222	.703703703703704	.555555555555556	.481481481481481	.925925925925926	6	0	6	0	1
1006690	0	12.5092402464066	3	3	4	.560323852096762	4.27272727272727	5	1.83333333333333	.222222222222222	.0740740740740741	.0740740740740741	.259259259259259	9	9	9	0	1
1007870	0	14.1629021218344	2	3	3	.564226779279836	3.36363636363636	3.5	2.27777777777778	.740740740740741	.666666666666667	.481481481481481	.703703703703704	6	9	9	0	1
1007670	1	12.9801505817933	3	3	3	.567950428730462	2.72727272727273	2.375	3.22222222222222	.62962962962963	.407407407407407	.333333333333333	.407407407407407	9	9	9	0	1
1005440	0	13.3196440793977	3	3	3	.577149682763696	2.63636363636364	3.25	1.16666666666667	.111111111111111	.148148148148148	.407407407407407	.333333333333333	9	9	9	0	1
1009250	1	12.1724845995893	2	2	4	.579419029774067	4.36363636363636	4.875	2.77777777777778	.703703703703704	.666666666666667	.777777777777778	.481481481481481	6	6	6	0	1
1006170	0	13.3333333333333	3	3	2	.58091208168039	3.63636363636364	4.75	2.38888888888889	.333333333333333	.37037037037037	.518518518518518	.37037037037037	9	9	9	0	1
1007770	1	13.056810403833	6	2	4	.584312413751783	3.36363636363636	4	2.44444444444444	.407407407407407	.407407407407407	.444444444444444	.555555555555556	15	6	15	0	1
1006880	1	12.8624229979466	3	3	4	.591056127026658	4.72727272727273	2.25	4.33333333333333	.444444444444444	.666666666666667	.296296296296296	.423076923076923	9	9	9	0	1
1009310	1	13.7604380561259	3	3	4	.591669264071949	3.09090909090909	4.375	2.11111111111111	.037037037037037	.555555555555556	.481481481481481	.481481481481481	9	9	9	0	1
1006520	1	12.4490075290897	3	3	4	.606302586597347	3.27272727272727	3.625	3.05555555555556	.333333333333333	.703703703703704	.592592592592593	.444444444444444	9	9	9	0	1
1006110	1	13.2101300479124	3	5	3	.608013479046678	2.36363636363636	3.375	2	.555555555555556	.740740740740741	.777777777777778	.518518518518518	9	12	12	0	1
1006470	0	14.3956194387406	3	2	3	.614091282582368	3.09090909090909	2.875	4.05555555555556	.555555555555556	.518518518518518	.333333333333333	.333333333333333	9	6	9	0	1
1006370	0	13.2183436002738	2	2	2	.619686771186251	3.18181818181818	3.625	3	.185185185185185	.37037037037037	.111111111111111	.333333333333333	6	6	6	0	1
1011450	0	12.7501711156742	2	3	3	.623195460751258	1.72727272727273	3.28571428571429	2.83333333333333	.703703703703704	.333333333333333	.444444444444444	.333333333333333	6	9	9	0	1
1006860	1	13.0869267624914	5	3	3	.624112912263905	2.81818181818182	1.25	4.83333333333333	.777777777777778	.592592592592593	.814814814814815	.777777777777778	12	9	12	0	1
1007720	1	12.6269678302533	3	5	4	.630842487470781	2	1.25	3.94444444444444	.62962962962963	.851851851851852	99	99	9	12	12	0	1
1006010	1	12.7583846680356	3	3	3	.633341271162222	4.09090909090909	3.25	3.55555555555556	.814814814814815	.851851851851852	.925925925925926	.407407407407407	9	9	9	0	1
1011540	0	12.8898015058179	2	3	3	.634153810755143	3.90909090909091	4.75	2.55555555555556	.259259259259259	.62962962962963	.962962962962963	.444444444444444	6	9	9	0	1
1010160	0	13.2594113620808	2	2	4	.639857724187626	2.90909090909091	3.25	3.22222222222222	.37037037037037	.333333333333333	.37037037037037	99	6	6	6	0	1
1008910	0	12.8240930869268	3	3	3	.64282089920505	3	4	2.38888888888889	.222222222222222	.111111111111111	.296296296296296	.703703703703704	9	9	9	0	1
1006480	1	13.1581108829569	2	2	4	.642843902075621	3.18181818181818	3.125	2.44444444444444	.333333333333333	.222222222222222	.222222222222222	.481481481481481	6	6	6	0	1
1006820	0	99	3	4	4	.645063580945723	4.09090909090909	2.875	3.16666666666667	.666666666666667	.592592592592593	.592592592592593	.407407407407407	9	12	12	0	1
1006740	1	12.0438056125941	3	3	3	.651644652154098	2.72727272727273	3.375	2.72222222222222	.111111111111111	.111111111111111	.111111111111111	.0740740740740741	9	9	9	0	1
1006290	1	12.8788501026694	3	6	3	.660132603393569	3.72727272727273	5	1.66666666666667	.148148148148148	.333333333333333	.259259259259259	.407407407407407	9	15	15	0	1
1006570	1	12.6981519507187	4	4	3	.680080382773564	2.5	3.75	2.66666666666667	.296296296296296	.444444444444444	.185185185185185	.423076923076923	12	12	12	0	1
1006180	0	11.4332648870637	3	3	3	.683595938270925	3.09090909090909	4	1.88888888888889	.148148148148148	99	99	.153846153846154	9	9	9	0	1
1005450	1	13.2922655715264	5	6	3	.686391285624325	3.63636363636364	3.375	2.55555555555556	.259259259259259	.666666666666667	.703703703703704	.888888888888889	12	15	15	0	1
1006150	0	13.6016427104723	3	3	3	.690743486459369	3.18181818181818	4.625	2.77777777777778	.444444444444444	.444444444444444	.333333333333333	.148148148148148	9	9	9	0	1
1006760	0	13.7686516084873	3	2	4	.69177023165052	3.63636363636364	3.875	2.55555555555556	.666666666666667	.518518518518518	.814814814814815	.592592592592593	9	6	9	0	1
1009100	1	14.1382614647502	3	2	3	.699457219592432	3.81818181818182	4.375	2.55555555555556	.407407407407407	.37037037037037	.62962962962963	.592592592592593	9	6	9	0	1
1005370	0	12.6269678302533	2	3	5	.705649700988731	4.36363636363636	4.25	1.44444444444444	.333333333333333	.222222222222222	.333333333333333	.153846153846154	6	9	9	0	1
1007850	0	13.0458590006845	2	3	4	.706300613671102	4.27272727272727	1.875	4.33333333333333	.703703703703704	1.03703703703704	.740740740740741	.777777777777778	6	9	9	0	1
1011650	0	13.2457221081451	3	3	3	.728452385416033	1.72727272727273	3.25	2.58823529411765	.962962962962963	.814814814814815	.296296296296296	.481481481481481	9	9	9	0	1
1006220	1	13.4264202600958	5	5	3	.730634842027529	4	4.5	2.66666666666667	.407407407407407	.444444444444444	.703703703703704	.518518518518518	12	12	12	0	1
1006750	0	12.3203285420945	3	3	4	.737126632841654	3.27272727272727	2.625	2.94444444444444	.703703703703704	.703703703703704	.703703703703704	.666666666666667	9	9	9	0	1
1006050	0	13.4209445585216	3	3	3	.743021236080086	3.72727272727273	4.875	1.88888888888889	.185185185185185	.111111111111111	.037037037037037	.115384615384615	9	9	9	0	1
1004860	1	12.6023271731691	3	3	3	.745605814593457	3.90909090909091	3.375	1.66666666666667	.925925925925926	.814814814814815	1.44444444444444	1.33333333333333	9	9	9	0	1
1008030	0	12.8678986995209	5	6	3	.752394449393554	3.90909090909091	4.375	1.83333333333333	.740740740740741	1.37037037037037	1	.962962962962963	12	15	15	0	1
1005670	1	12.8870636550308	6	4	3	.755754873111093	4.36363636363636	4.625	2	.185185185185185	.222222222222222	.259259259259259	.185185185185185	15	12	15	0	1
1005680	0	13.4401095140315	2	3	3	.771064143241505	4.09090909090909	5	1.77777777777778	.148148148148148	.111111111111111	.148148148148148	99	6	9	9	0	1
1006390	1	12.9637234770705	3	2	3	.776870372997836	3.54545454545455	4.75	3.44444444444444	.888888888888889	.259259259259259	.185185185185185	.259259259259259	9	6	9	0	1
1008000	1	12.6652977412731	6	4	3	.776960954135043	3.81818181818182	4.125	3.16666666666667	.296296296296296	.407407407407407	.555555555555556	.333333333333333	15	12	15	0	1
1005750	0	13.2210814510609	5	3	3	.7775512022444	2.90909090909091	3.875	3.33333333333333	.37037037037037	.259259259259259	.269230769230769	.307692307692308	12	9	12	0	1
1004750	0	12.9445585215606	3	5	3	.781149402111399	3.36363636363636	3	2.11764705882353	.666666666666667	99	99	99	9	12	12	0	1
1006810	1	13.9082819986311	3	2	4	.783377436285314	3.36363636363636	3.75	2.5	.0740740740740741	.185185185185185	.148148148148148	.111111111111111	9	6	9	0	1
1005320	1	12.5557837097878	3	2	4	.784237266601597	3.45454545454545	3.75	1.77777777777778	.444444444444444	.444444444444444	.555555555555556	.5	9	6	9	0	1
1007910	1	12.2929500342231	5	3	4	.804236981070276	4.18181818181818	4	2.88888888888889	.703703703703704	.888888888888889	.814814814814815	.925925925925926	12	9	12	0	1
1004760	1	12.498288843258	3	5	3	.811213327193512	3.90909090909091	3	2.72222222222222	.222222222222222	.333333333333333	.518518518518518	.444444444444444	9	12	12	0	1
1007710	1	14.0698151950719	3	2	5	.812997124739427	4	4.375	1.44444444444444	.148148148148148	.148148148148148	.037037037037037	.185185185185185	9	6	9	0	1
1007700	0	13.6947296372348	3	3	2	.814205685480838	3.81818181818182	4.375	2.44444444444444	.222222222222222	.185185185185185	.296296296296296	.222222222222222	9	9	9	0	1
1008070	1	13.0704996577687	3	3	3	.816760046613681	4.18181818181818	4.875	1.5	0	.148148148148148	.0740740740740741	.185185185185185	9	9	9	0	1
1004780	0	12.8459958932238	6	6	3	.826260461580978	4.36363636363636	4.125	2.27777777777778	.814814814814815	.37037037037037	.37037037037037	.407407407407407	15	15	15	0	1
1006790	1	12.3504449007529	3	4	3	.841039504704107	3.81818181818182	3.5	2.38888888888889	.37037037037037	.444444444444444	.296296296296296	.185185185185185	9	12	12	0	1
1006720	1	11.4551676933607	2	2	4	.841263759481295	2.54545454545455	3.125	3.55555555555556	.444444444444444	.185185185185185	.111111111111111	.296296296296296	6	6	6	0	1
1007640	0	13.0951403148528	2	1	3	.859162013191003	3.90909090909091	4.125	1.55555555555556	.444444444444444	.814814814814815	.592592592592593	.333333333333333	6	0	6	0	1
1006710	1	12.8733744010951	3	3	4	.864047903415239	2.45454545454545	3.75	3.44444444444444	.555555555555556	.62962962962963	.407407407407407	.703703703703704	9	9	9	0	1
1004830	1	12.4572210814511	2	3	3	.881890929703488	4.36363636363636	4.25	1.61111111111111	.333333333333333	1.11111111111111	.888888888888889	1.14814814814815	6	9	9	0	1
1005030	1	12.5503080082136	4	3	2	.885350912826064	3.45454545454545	5	1.66666666666667	.037037037037037	.111111111111111	.222222222222222	.518518518518518	12	9	12	0	1
1007620	1	11.8904859685147	3	3	3	.893346777868889	3	4.5	1.44444444444444	.444444444444444	.62962962962963	.62962962962963	.814814814814815	9	9	9	0	1
1006800	1	12.6351813826146	5	5	4	.896876550603038	2.45454545454545	1.875	4.66666666666667	.444444444444444	.296296296296296	.148148148148148	.481481481481481	12	12	12	0	1
1004850	1	12.9911019849418	3	3	4	.911158607935577	3.72727272727273	4.625	2.16666666666667	.259259259259259	.333333333333333	.703703703703704	.444444444444444	9	9	9	0	1
1005000	1	13.8015058179329	3	3	4	.93416155787563	1.27272727272727	3.125	4.05555555555556	1.44444444444444	99	99	99	9	9	9	0	1
1006870	1	12.2847364818617	3	3	3	.934232279974848	3.90909090909091	4.375	3.72222222222222	.518518518518518	.518518518518518	.740740740740741	.444444444444444	9	9	9	0	1
1005070	0	12.8596851471595	7	2	3	.940691274748477	3.63636363636364	5	1.22222222222222	.259259259259259	1.22222222222222	.666666666666667	.37037037037037	16	6	16	0	1
1004890	0	12.1286789869952	3	3	4	.952899131383541	3.18181818181818	2.875	2.11111111111111	.962962962962963	.703703703703704	.962962962962963	1.03703703703704	9	9	9	0	1
1004790	1	13.2867898699521	5	5	4	.964997545842079	4	5	3	1.18518518518519	.259259259259259	1.25925925925926	1	12	12	12	0	1
1005010	1	11.8220396988364	5	5	3	.974450121854858	3.36363636363636	3.75	1.77777777777778	.777777777777778	.481481481481481	.222222222222222	.037037037037037	12	12	12	0	1
1005050	1	11.9315537303217	5	5	3	.985290345912328	4.09090909090909	4.625	1.83333333333333	.518518518518518	.740740740740741	.814814814814815	.481481481481481	12	12	12	0	1
1006730	0	13.1471594798084	2	5	3	.995981686901136	3.18181818181818	3.5	2.22222222222222	.148148148148148	.148148148148148	.296296296296296	.407407407407407	6	12	12	0	1
1005100	0	12.9582477754962	5	5	5	1.00768750565393	4	2.875	3.55555555555556	.888888888888889	.703703703703704	1.37037037037037	1.44444444444444	12	12	12	0	1
1004950	0	12.6461327857632	3	2	4	1.00942520840919	4.27272727272727	4	2.16666666666667	.703703703703704	.888888888888889	.814814814814815	1.07407407407407	9	6	9	0	1
1007650	0	13.0540725530459	3	3	3	1.02293983665713	3.36363636363636	3.125	2.83333333333333	.962962962962963	.666666666666667	.740740740740741	.740740740740741	9	9	9	0	1
1006360	1	13.3360711841205	2	3	3	1.02583645381307	4.18181818181818	5	1	.148148148148148	.148148148148148	.037037037037037	.148148148148148	6	9	9	0	1
1005190	1	12.4517453798768	3	3	3	1.03262023059057	3.09090909090909	4.25	2.88888888888889	.148148148148148	.259259259259259	.740740740740741	.592592592592593	9	9	9	0	1
1005220	0	12.8514715947981	7	6	4	1.03299399576822	3.27272727272727	3.75	2	.222222222222222	.851851851851852	.814814814814815	.814814814814815	16	15	16	0	1
1004940	1	12.5612594113621	5	5	3	1.06190277844851	4.54545454545455	4.75	1.27777777777778	.0740740740740741	.222222222222222	.333333333333333	.333333333333333	12	12	12	0	1
1005180	1	13.6399726214921	5	2	4	1.06197931368178	4.36363636363636	5	2.16666666666667	.259259259259259	.259259259259259	.37037037037037	.555555555555556	12	6	12	0	1
1005550	1	12.5968514715948	3	2	4	1.06499087572219	3.72727272727273	3.75	2.61111111111111	.423076923076923	99	99	.37037037037037	9	6	9	0	1
1006640	1	14.4093086926763	5	3	3	1.06528692355118	3.45454545454545	3.5	2.22222222222222	.481481481481481	.518518518518518	.407407407407407	.296296296296296	12	9	12	0	1
1005380	0	13.2594113620808	5	5	4	1.08247809214899	4.18181818181818	4.375	2.17647058823529	.407407407407407	.740740740740741	.518518518518518	.481481481481481	12	12	12	0	1
1004970	1	12.8925393566051	3	3	3	1.08784866224598	3	3.5	2.44444444444444	1.25925925925926	.777777777777778	.814814814814815	.666666666666667	9	9	9	0	1
1006490	1	12.0903490759754	2	3	3	1.13585016273309	3.18181818181818	4.375	1.61111111111111	.185185185185185	.37037037037037	.222222222222222	.481481481481481	6	9	9	0	1
1005040	1	12.5557837097878	5	5	4	1.1395367360781	4	4	1.77777777777778	.62962962962963	1	1.07407407407407	.814814814814815	12	12	12	0	1
1005420	1	13.0951403148528	5	3	3	1.1450722042331	4.27272727272727	3.625	3	.296296296296296	99	99	.777777777777778	12	9	12	0	1
1004740	1	13.1444216290212	3	3	3	1.14588215055702	3.63636363636364	4.75	2	.740740740740741	.333333333333333	.37037037037037	.185185185185185	9	9	9	0	1
1005210	1	12.4079397672827	3	2	4	1.15953911851744	3.36363636363636	3.125	1.66666666666667	.444444444444444	.592592592592593	.555555555555556	.888888888888889	9	6	9	0	1
1007610	1	12.7091033538672	3	3	3	1.16006469827898	3	4.75	1.11111111111111	.259259259259259	.037037037037037	.0740740740740741	.333333333333333	9	9	9	0	1
1004820	0	12.2409308692676	3	5	3	1.16571910222035	4.09090909090909	4.25	2.55555555555556	.444444444444444	.259259259259259	.444444444444444	1.33333333333333	9	12	12	0	1
1004900	0	12.0930869267625	2	3	3	1.16967441840837	4.18181818181818	3.875	1.77777777777778	.481481481481481	.555555555555556	.518518518518518	.740740740740741	6	9	9	0	1
1004840	1	12.4845995893224	3	3	3	1.17530528106236	5	3.75	3.44444444444444	1.25925925925926	1.07407407407407	99	99	9	9	9	0	1
1004870	0	12.6954140999316	3	2	3	1.18000691605734	3.36363636363636	4.25	1.72222222222222	.703703703703704	.518518518518518	1.18518518518519	1.03703703703704	9	6	9	0	1
1005170	1	13.1170431211499	5	5	4	1.19755301578055	4.72727272727273	3	1.83333333333333	.407407407407407	.62962962962963	.259259259259259	.444444444444444	12	12	12	0	1
1004960	1	12.4873374401095	5	5	3	1.20638663726889	3.81818181818182	5	1.44444444444444	.111111111111111	.148148148148148	.962962962962963	.259259259259259	12	12	12	0	1
1004800	1	12.6570841889117	3	3	3	1.20937043215604	3.36363636363636	2.5	3.44444444444444	.592592592592593	.76	.703703703703704	.888888888888889	9	9	9	0	1
1004990	0	12.1177275838467	5	3	4	1.2412977914747	4.45454545454545	4.125	3.44444444444444	.222222222222222	.851851851851852	.962962962962963	.888888888888889	12	9	12	0	1
1005110	0	12.8624229979466	5	6	3	1.24260192309763	3.36363636363636	3.75	2.83333333333333	.444444444444444	.37037037037037	.296296296296296	.407407407407407	12	15	15	0	1
1004880	0	12.8898015058179	3	2	3	1.24884108592082	2.72727272727273	4.375	1.33333333333333	.148148148148148	.333333333333333	.37037037037037	.481481481481481	9	6	9	0	1
1004980	1	13.6591375770021	2	2	4	1.26736483521163	4.36363636363636	5	3.55555555555556	1.2962962962963	.666666666666667	.62962962962963	.851851851851852	6	6	6	0	1
1005200	0	12.6242299794661	7	7	3	1.27466302503097	4.36363636363636	4.625	2.61111111111111	.333333333333333	.0740740740740741	.115384615384615	.037037037037037	16	16	16	0	1
1005230	1	12.6735112936345	5	3	3	1.28096955950719	3.90909090909091	4	1.88888888888889	.148148148148148	.185185185185185	.296296296296296	.222222222222222	12	9	12	0	1
1005120	1	12.1779603011636	6	6	3	1.31223336926244	4.27272727272727	5	1.72222222222222	.592592592592593	1.48148148148148	1.2962962962963	.666666666666667	15	15	15	0	1
1004810	1	13.741273100616	6	5	3	1.33141561845018	2.63636363636364	2.125	4.83333333333333	.703703703703704	.740740740740741	.740740740740741	.814814814814815	15	12	15	0	1
1004920	0	13.4318959616701	7	4	4	1.3332097190305	4.09090909090909	4.625	1.94444444444444	.296296296296296	.296296296296296	.259259259259259	.259259259259259	16	12	16	0	1
1004770	1	13.0321697467488	3	4	4	1.33441716168472	2.63636363636364	4.25	1.61111111111111	.62962962962963	.666666666666667	1	1.03703703703704	9	12	12	0	1
1005080	1	12.6598220396988	3	3	4	1.35667448962293	3.27272727272727	4.875	2.05555555555556	.555555555555556	1.07407407407407	.962962962962963	.962962962962963	9	9	9	0	1
1021270	0	12.6954140999316	3	3	3	99	4.09090909090909	5	1.77777777777778	.185185185185185	.222222222222222	.259259259259259	.259259259259259	9	9	9	0	0
1020710	0	12.3750855578371	4	5	3	99	4.63636363636364	5	1.66666666666667	.037037037037037	0	.037037037037037	.0740740740740741	12	12	12	0	0
1023900	1	12.7392197125257	3	3	3	99	3.63636363636364	4.875	2.5	.444444444444444	.444444444444444	.62962962962963	.444444444444444	9	9	9	0	0
1018890	1	12.9253935660507	3	5	3	99	4.54545454545455	4.75	1.16666666666667	.0740740740740741	.0740740740740741	.037037037037037	.037037037037037	9	12	12	0	0
1026260	1	12.208076659822	7	7	3	99	4.90909090909091	4.75	3	.518518518518518	.444444444444444	.555555555555556	.703703703703704	16	16	16	0	0
1017440	0	12.7145790554415	7	3	3	99	4	4.625	2.76470588235294	.37037037037037	.740740740740741	.592592592592593	1.14814814814815	16	9	16	0	0
1018800	1	12.4325804243669	5	5	3	99	4.18181818181818	4.625	4.11111111111111	.777777777777778	.444444444444444	.296296296296296	.444444444444444	12	12	12	0	0
1025830	1	13.0458590006845	3	3	4	99	4.27272727272727	4.625	3	.518518518518518	.703703703703704	.555555555555556	.538461538461538	9	9	9	0	0
1020650	0	12.7145790554415	3	3	4	99	4.09090909090909	4.5	2.83333333333333	.296296296296296	.333333333333333	.111111111111111	.259259259259259	9	9	9	0	0
1024280	1	99	5	3	3	99	2.63636363636364	4.5	3.55555555555556	.259259259259259	.888888888888889	.851851851851852	.888888888888889	12	9	12	0	0
1025460	1	12.5968514715948	5	6	5	99	4.36363636363636	4.5	3	.185185185185185	.444444444444444	.333333333333333	.481481481481481	12	15	15	0	0
1021970	1	12.082135523614	2	3	3	99	4	4.375	1.94444444444444	.0740740740740741	.333333333333333	.222222222222222	.148148148148148	6	9	9	0	0
1021280	1	12.394250513347	6	4	3	99	3.63636363636364	4.375	1.38888888888889	.259259259259259	.222222222222222	.037037037037037	.444444444444444	15	12	15	0	0
1019370	0	13.4209445585216	5	3	3	99	2.09090909090909	4.25	2.88888888888889	.444444444444444	.185185185185185	.0740740740740741	.148148148148148	12	9	12	0	0
1026430	0	12.8158795345654	3	3	2	99	4.09090909090909	4.25	2.5	.148148148148148	.111111111111111	.111111111111111	.259259259259259	9	9	9	0	0
1018240	1	12.8624229979466	3	3	3	99	4.36363636363636	4.25	1.88888888888889	.518518518518518	.814814814814815	.481481481481481	.740740740740741	9	9	9	0	0
1018900	1	13.1170431211499	3	3	4	99	4.27272727272727	4.25	2.83333333333333	.851851851851852	.777777777777778	.666666666666667	.518518518518518	9	9	9	0	0
1026370	0	12.3832991101985	5	5	4	99	3.63636363636364	4.125	2.11111111111111	.333333333333333	.296296296296296	.296296296296296	.111111111111111	12	12	12	0	0
1019570	0	13.8726899383984	5	5	4	99	3.18181818181818	4.125	2.66666666666667	.222222222222222	.0740740740740741	.444444444444444	.555555555555556	12	12	12	0	0
1018050	0	12.476386036961	5	4	2	99	3.81818181818182	4.125	2.5	.148148148148148	.481481481481481	.148148148148148	.222222222222222	12	12	12	0	0
1025620	1	13.0431211498973	3	3	3	99	3.81818181818182	4.125	4.16666666666667	.185185185185185	.555555555555556	.259259259259259	.185185185185185	9	9	9	0	0
1022950	0	13.0704996577687	3	3	3	99	3.54545454545455	4	2.22222222222222	.518518518518518	.814814814814815	.888888888888889	.555555555555556	9	9	9	0	0
1017610	0	13.4948665297741	5	2	3	99	3.72727272727273	3.875	1.77777777777778	.592592592592593	.592592592592593	.592592592592593	.518518518518518	12	6	12	0	0
1025680	1	13.3004791238877	3	3	4	99	3.45454545454545	3.875	1.33333333333333	.666666666666667	1.22222222222222	.814814814814815	.518518518518518	9	9	9	0	0
1020220	1	13.2758384668036	4	4	3	99	3.36363636363636	3.75	2.27777777777778	.222222222222222	.666666666666667	.37037037037037	.407407407407407	12	12	12	0	0
1026120	0	13.1279945242984	6	5	4	99	3.63636363636364	3.625	2.66666666666667	.444444444444444	1	.703703703703704	.37037037037037	15	12	15	0	0
1019640	1	12.4818617385352	3	3	3	99	3.90909090909091	3.625	1.88888888888889	.407407407407407	.518518518518518	.37037037037037	.222222222222222	9	9	9	0	0
1022250	1	13.1772758384668	3	3	3	99	2.54545454545455	3.625	1.55555555555556	.296296296296296	.333333333333333	.333333333333333	.259259259259259	9	9	9	0	0
1017420	0	12.5338809034908	3	3	3	99	3.63636363636364	3.5	2.38888888888889	.0740740740740741	0	.222222222222222	.037037037037037	9	9	9	0	0
1023050	0	12.0793976728268	3	3	3	99	3.90909090909091	3.5	4.16666666666667	.777777777777778	.62962962962963	.222222222222222	.444444444444444	9	9	9	0	0
1025160	0	12.5831622176591	3	3	4	99	3.27272727272727	3.5	2.38888888888889	.037037037037037	.296296296296296	.518518518518518	.481481481481481	9	9	9	0	0
1024810	1	13.2813141683778	3	3	5	99	3.90909090909091	3.5	2.22222222222222	.888888888888889	.925925925925926	.814814814814815	.481481481481481	9	9	9	0	0
1026410	0	12.7392197125257	7	5	3	99	2.81818181818182	3.375	2.16666666666667	.444444444444444	.740740740740741	.962962962962963	.407407407407407	16	12	16	0	0
1019940	1	13.1909650924025	5	3	4	99	3.36363636363636	3.375	2.22222222222222	.296296296296296	.148148148148148	.037037037037037	0	12	9	12	0	0
1021000	1	13.3497604380561	4	5	3	99	2.81818181818182	3.375	2.5	.888888888888889	.962962962962963	.851851851851852	.37037037037037	12	12	12	0	0
1023930	0	12.4161533196441	4	3	3	99	3.09090909090909	3.25	2.5	.518518518518518	.407407407407407	.222222222222222	.222222222222222	12	9	12	0	0
1022320	1	12.7145790554415	5	5	3	99	3.18181818181818	3.25	2.77777777777778	.407407407407407	.185185185185185	.259259259259259	.148148148148148	12	12	12	0	0
1023230	1	12.6269678302533	5	3	3	99	2.81818181818182	3.25	3.22222222222222	1.18518518518519	.851851851851852	.925925925925926	.925925925925926	12	9	12	0	0
1020810	1	13.1553730321697	5	2	3	99	2.63636363636364	3.25	2.72222222222222	.481481481481481	.777777777777778	.666666666666667	.592592592592593	12	6	12	0	0
1018700	0	13.2375085557837	3	3	4	99	2.45454545454545	3.125	2.22222222222222	.296296296296296	.148148148148148	.148148148148148	.111111111111111	9	9	9	0	0
1023070	1	12.3750855578371	5	5	3	99	2.54545454545455	2.875	3.55555555555556	.407407407407407	.555555555555556	.481481481481481	.444444444444444	12	12	12	0	0
1018270	1	12.1341546885695	7	7	3	99	4.63636363636364	2.875	2.61111111111111	.62962962962963	.62962962962963	.740740740740741	.740740740740741	16	16	16	0	0
1020030	1	13.2785763175907	2	3	3	99	2.63636363636364	2.75	2.66666666666667	.333333333333333	.444444444444444	.444444444444444	.296296296296296	6	9	9	0	0
1018720	1	12.3750855578371	3	3	3	99	4.45454545454545	2.75	2.16666666666667	.592592592592593	1.07407407407407	.666666666666667	.407407407407407	9	9	9	0	0
1024900	0	12.5776865160849	3	3	3	99	2.45454545454545	1.875	4.33333333333333	1.2962962962963	.814814814814815	.666666666666667	.666666666666667	9	9	9	0	0
1018420	0	12.9801505817933	3	3	3	99	3.09090909090909	1.25	1.66666666666667	.730769230769231	.592592592592593	.666666666666667	.259259259259259	9	9	9	0	0
1019450	0	12.7611225188227	3	3	3	-2.17681572170556	3.09090909090909	3.625	3.11111111111111	.666666666666667	1.03703703703704	.481481481481481	.37037037037037	9	9	9	0	0
1019760	0	99	5	5	2	-2.15529105880382	1.72727272727273	2.5	3.94117647058824	.518518518518518	.346153846153846	.259259259259259	.0740740740740741	12	12	12	0	0
1018070	0	14.2368240930869	5	5	2	-2.04623681721133	1.63636363636364	3.125	3.22222222222222	.444444444444444	.64	.888888888888889	99	12	12	12	0	0
1023250	1	13.4154688569473	7	5	3	-2.00110757364221	4	3.875	3.05555555555556	.962962962962963	.814814814814815	.444444444444444	.962962962962963	16	12	16	0	0
1020860	0	12.8733744010951	2	3	4	-1.98467964111092	1.72727272727273	3.875	3.44444444444444	.481481481481481	.884615384615385	.777777777777778	99	6	9	9	0	0
1024650	0	13.5304585900068	5	3	2	-1.96881874041706	4.18181818181818	4.125	2.5	.333333333333333	.407407407407407	.296296296296296	.0740740740740741	12	9	12	0	0
1017780	1	12.8104038329911	4	7	2	-1.95306626551043	2.36363636363636	3	3.88235294117647	.703703703703704	.851851851851852	.962962962962963	.925925925925926	12	16	16	0	0
1023660	0	12.4845995893224	7	5	3	-1.94376404684775	3.18181818181818	4.125	3.11111111111111	.518518518518518	.962962962962963	.444444444444444	.518518518518518	16	12	16	0	0
1023370	0	12.3175906913073	3	3	4	-1.87280131586899	1.09090909090909	1.125	4.38888888888889	1.33333333333333	1.37037037037037	.703703703703704	1.48148148148148	9	9	9	0	0
1022920	0	12.7583846680356	2	5	2	-1.78094070745157	5	4.125	2.52941176470588	1.33333333333333	.555555555555556	.444444444444444	.888888888888889	6	12	12	0	0
1017870	0	99	5	5	2	-1.71812354810622	3.09090909090909	1.75	4.22222222222222	.64	1.2962962962963	99	99	12	12	12	0	0
1017890	0	13.3004791238877	4	4	3	-1.71187104267155	2.90909090909091	2.25	2.44444444444444	1.11111111111111	.888888888888889	.777777777777778	.888888888888889	12	12	12	0	0
1019900	1	12.3559206023272	5	5	4	-1.70914910724573	3.72727272727273	2.875	2.77777777777778	1.15384615384615	1.2962962962963	1.22222222222222	1.40740740740741	12	12	12	0	0
1020390	0	13.1827515400411	6	3	3	-1.64953821683509	2.09090909090909	2.25	1.94117647058824	.777777777777778	.407407407407407	.185185185185185	99	15	9	15	0	0
1022450	0	99	3	3	3	-1.58952583238058	3	3.5	2.27777777777778	.407407407407407	.444444444444444	99	99	9	9	9	0	0
1024710	0	12.3203285420945	3	3	3	-1.58546019787964	3.63636363636364	2.625	2.72222222222222	1.25925925925926	1.7037037037037	1.18518518518519	.777777777777778	9	9	9	0	0
1019460	0	12.0164271047228	3	3	5	-1.55840178765542	4.27272727272727	1.375	4.11111111111111	1.18518518518519	99	99	99	9	9	9	0	0
1022700	1	13.3497604380561	3	4	5	-1.5570238327592	2.90909090909091	3.125	3.38888888888889	1.25925925925926	1.44444444444444	1.18518518518519	1.25925925925926	9	12	12	0	0
1024910	0	13.1964407939767	2	2	3	-1.54479999611427	3.27272727272727	2.875	2.72222222222222	.592592592592593	.666666666666667	.666666666666667	.703703703703704	6	6	6	0	0
1024020	1	13.1362080766598	3	3	4	-1.45994954564949	3.36363636363636	3.25	2.70588235294118	.615384615384615	.592592592592593	.666666666666667	.481481481481481	9	9	9	0	0
1021770	1	12.9144421629021	3	3	1	-1.42344412273325	2.54545454545455	4.75	2.61111111111111	1	99	99	99	9	9	9	0	0
1024720	0	12.9199178644764	3	3	3	-1.41882726231696	4.09090909090909	4.75	3.44444444444444	.407407407407407	.333333333333333	.296296296296296	.333333333333333	9	9	9	0	0
1025310	0	13.3415468856947	3	3	3	-1.39308892486668	3.27272727272727	2.875	2.83333333333333	.807692307692308	.962962962962963	.962962962962963	99	9	9	9	0	0
1025340	0	14.3080082135524	5	3	3	-1.38946386378905	3.45454545454545	3.875	2.94444444444444	1.25925925925926	1.40740740740741	.925925925925926	1.2962962962963	12	9	12	0	0
1019310	1	12.3969883641342	3	6	3	-1.37357089704272	2	1.125	4.55555555555556	.925925925925926	.851851851851852	.666666666666667	.333333333333333	9	15	15	0	0
1018370	0	12.8514715947981	3	3	4	-1.3431394721321	4	5	2	.222222222222222	.307692307692308	.0740740740740741	.185185185185185	9	9	9	0	0
1025000	0	12.0273785078713	3	2	4	-1.33159173221356	2.7	3.875	1.72222222222222	.740740740740741	.925925925925926	.851851851851852	.888888888888889	9	6	9	0	0
1023630	0	12.8569472963723	99	99	5	-1.31691204162326	1.90909090909091	1.375	4.38888888888889	1.08	1.14814814814815	.703703703703704	.62962962962963	99	99	99	0	0
1021070	1	13.0184804928131	3	2	4	-1.30996031818072	4.72727272727273	4.125	2.11111111111111	.555555555555556	.407407407407407	.592592592592593	.592592592592593	9	6	9	0	0
1021680	1	12.7337440109514	3	3	3	-1.30364836636768	3.45454545454545	4	3.83333333333333	.407407407407407	.62962962962963	.444444444444444	.592592592592593	9	9	9	0	0
1019730	0	13.1800136892539	5	5	2	-1.27468110202116	4.27272727272727	4.75	2.5	.296296296296296	.333333333333333	.222222222222222	.192307692307692	12	12	12	0	0
1026280	0	13.056810403833	5	5	3	-1.24996866938918	3.09090909090909	3.25	2.66666666666667	.333333333333333	.185185185185185	.0384615384615385	.185185185185185	12	12	12	0	0
1022840	0	12.2135523613963	2	3	3	-1.20346948306897	4.45454545454545	4.75	4.23529411764706	.518518518518518	.148148148148148	.259259259259259	.148148148148148	6	9	9	0	0
1022690	0	12.643394934976	2	6	3	-1.18516238002758	4.63636363636364	3.75	2.88888888888889	.851851851851852	1.03846153846154	.481481481481481	.444444444444444	6	15	15	0	0
1019610	1	12.7583846680356	5	5	5	-1.18359606345233	3.27272727272727	3.625	2.55555555555556	.185185185185185	.37037037037037	99	99	12	12	12	0	0
1019600	1	12.8158795345654	99	3	5	-1.18100517278204	3.45454545454545	3.14285714285714	3.66666666666667	.62962962962963	.925925925925926	1	1	99	9	99	0	0
1021370	0	13.0376454483231	3	5	4	-1.17301025013485	3.5	1.75	3.88888888888889	.851851851851852	.740740740740741	.555555555555556	.592592592592593	9	12	12	0	0
1022960	0	99	2	2	4	-1.13894522765279	2.09090909090909	1.125	3.11111111111111	1.22222222222222	1.51851851851852	1.18518518518519	1.40740740740741	6	6	6	0	0
1022400	1	13.056810403833	3	3	3	-1.12091881721587	3.18181818181818	3.875	2.72222222222222	.407407407407407	.296296296296296	.259259259259259	99	9	9	9	0	0
1022750	0	12.5420944558522	3	3	3	-1.09932258894578	3.36363636363636	3.625	2.61111111111111	.481481481481481	.37037037037037	.592592592592593	.666666666666667	9	9	9	0	0
1024440	0	12.539356605065	3	3	3	-1.08429674948114	3.90909090909091	3.25	4.16666666666667	.481481481481481	.555555555555556	.666666666666667	.814814814814815	9	9	9	0	0
1019360	0	13.8480492813142	3	2	3	-1.07639453692784	3.09090909090909	3.625	4	.703703703703704	.555555555555556	99	99	9	6	9	0	0
1019870	0	12.3011635865845	3	3	3	-1.06662398680091	1	4.5	5	1.40740740740741	.814814814814815	.777777777777778	1.03846153846154	9	9	9	0	0
1025860	0	99	3	3	4	-1.05211234536302	3.81818181818182	3.75	2.22222222222222	.814814814814815	1	1.11111111111111	.740740740740741	9	9	9	0	0
1018770	1	12.4462696783025	3	3	3	-1.04916836819117	3.54545454545455	2.25	2.27777777777778	.555555555555556	.185185185185185	99	99	9	9	9	0	0
1024420	1	13.1498973305955	3	5	4	-1.02718958537266	4.11111111111111	4.75	4.05555555555556	.777777777777778	.777777777777778	.592592592592593	.407407407407407	9	12	12	0	0
1026090	0	12.9445585215606	2	2	3	-1.00318441161855	2.63636363636364	2.75	3.05555555555556	.851851851851852	.518518518518518	.851851851851852	.518518518518518	6	6	6	0	0
1025550	0	12.4654346338125	3	3	4	-1.00091190837876	4.27272727272727	4.625	2.61111111111111	.185185185185185	.444444444444444	.333333333333333	.333333333333333	9	9	9	0	0
1018530	1	12.5995893223819	3	99	3	-.992722712136545	2.90909090909091	2.625	2.88888888888889	1.07407407407407	1.23076923076923	1	1.07407407407407	9	99	99	0	0
1025740	0	99	5	3	1	-.98770290035805	4.09090909090909	3.75	3.88888888888889	1.18518518518519	.703703703703704	.814814814814815	.962962962962963	12	9	12	0	0
1026600	1	13.2731006160164	3	3	3	-.986500352016079	2.72727272727273	3.5	2.77777777777778	.444444444444444	.333333333333333	.37037037037037	.333333333333333	9	9	9	0	0
1017770	0	14.1081451060917	5	5	3	-.980681002343007	3.36363636363636	3.625	3.77777777777778	.5	.777777777777778	.962962962962963	.888888888888889	12	12	12	0	0
1019970	1	13.9164955509925	3	2	3	-.972906677830275	2.27272727272727	3.125	1.55555555555556	1.40740740740741	.925925925925926	99	99	9	6	9	0	0
1026710	1	12.7145790554415	4	4	3	-.958113367745337	4.27272727272727	3.625	2.94444444444444	.518518518518518	.407407407407407	.481481481481481	.592592592592593	12	12	12	0	0
1021330	1	99	4	3	3	-.954610095880276	3.72727272727273	4.75	2.88888888888889	1.11111111111111	1.2962962962963	1.2962962962963	99	12	9	12	0	0
1022560	1	12.662559890486	3	3	2	-.950511182839453	2.54545454545455	2.25	2.66666666666667	.888888888888889	1.03846153846154	.777777777777778	.851851851851852	9	9	9	0	0
1026640	1	12.7912388774812	3	3	3	-.939323930756948	3.36363636363636	3	3.22222222222222	.185185185185185	.148148148148148	.518518518518518	.222222222222222	9	9	9	0	0
1020290	0	13.0458590006845	4	4	3	-.923469354526041	3	4.5	4.22222222222222	1.40740740740741	.703703703703704	.740740740740741	1.11111111111111	12	12	12	0	0
1024780	0	13.1170431211499	5	3	3	-.920240363152204	4.36363636363636	2.5	1.61111111111111	.148148148148148	.296296296296296	.333333333333333	.481481481481481	12	9	12	0	0
1024460	0	99	2	2	5	-.912340325525979	3.54545454545455	3.375	3.16666666666667	.333333333333333	.111111111111111	.259259259259259	.185185185185185	6	6	6	0	0
1021090	0	12.2518822724162	3	3	2	-.893921995262093	3.54545454545455	2.5	2.66666666666667	.461538461538462	.62962962962963	99	99	9	9	9	0	0
1024510	0	12.0711841204654	5	5	2	-.884428196415408	3.63636363636364	2.875	2.55555555555556	.259259259259259	.333333333333333	.37037037037037	.407407407407407	12	12	12	0	0
1017860	0	99	3	3	3	-.884322707495857	4.90909090909091	3.5	3.44444444444444	.185185185185185	.185185185185185	99	99	9	9	9	0	0
1020180	1	12.3997262149213	3	6	3	-.872192796269875	4.45454545454545	4.375	2.5	.962962962962963	1.22222222222222	1.37037037037037	1.40740740740741	9	15	15	0	0
1023730	0	12.8898015058179	3	6	3	-.863720060026673	4.90909090909091	5	2.61111111111111	.111111111111111	.0740740740740741	.037037037037037	.481481481481481	9	15	15	0	0
1018640	1	12.4928131416838	3	3	4	-.863201319650838	4.6	4.25	2.27777777777778	.518518518518518	.423076923076923	.407407407407407	.592592592592593	9	9	9	0	0
1020530	0	12.7145790554415	5	5	3	-.861309219047975	3.27272727272727	3.25	2.94444444444444	.37037037037037	.333333333333333	.222222222222222	.222222222222222	12	12	12	0	0
1020690	0	13.3744010951403	3	2	3	-.843351943025262	3.36363636363636	2.125	2.83333333333333	.37037037037037	.230769230769231	.222222222222222	0	9	6	9	0	0
1023620	1	13.2402464065708	4	3	3	-.836332517490561	3.09090909090909	3.125	2.83333333333333	1.03703703703704	.666666666666667	.814814814814815	.777777777777778	12	9	12	0	0
1022510	0	12.7364818617385	3	5	3	-.824102457663525	3.45454545454545	1.25	3.16666666666667	.740740740740741	.888888888888889	1.11111111111111	1.25925925925926	9	12	12	0	0
1024730	1	99	3	3	4	-.80730715041852	3.63636363636364	3.5	3	.703703703703704	.62962962962963	.814814814814815	1.14814814814815	9	9	9	0	0
1022910	0	12.8021902806297	3	5	3	-.78230867046992	2.18181818181818	2.625	1.66666666666667	.333333333333333	.592592592592593	.0740740740740741	.185185185185185	9	12	12	0	0
1021580	1	12.5639972621492	2	3	3	-.777568660024574	2.90909090909091	3.375	3.11111111111111	.703703703703704	.518518518518518	99	99	6	9	9	0	0
1023190	1	12.6379192334018	3	3	4	-.770468305749373	3.90909090909091	4.125	3.44444444444444	.296296296296296	.481481481481481	.296296296296296	.222222222222222	9	9	9	0	0
1018440	0	13.5824777549624	2	2	3	-.768435950318555	3.09090909090909	2.875	2.94444444444444	.333333333333333	.777777777777778	.296296296296296	.296296296296296	6	6	6	0	0
1025300	1	12.684462696783	6	6	3	-.754215308243264	3.54545454545455	3.5	3.44444444444444	.925925925925926	1.37037037037037	.814814814814815	.814814814814815	15	15	15	0	0
1021180	0	14.0123203285421	5	5	4	-.74559142172277	4.27272727272727	3.125	2.94117647058824	.538461538461538	99	99	99	12	12	12	0	0
1024860	1	12.6735112936345	4	3	4	-.734595609177348	2.81818181818182	1.5	3.47058823529412	.62962962962963	.296296296296296	.346153846153846	.730769230769231	12	9	12	0	0
1020910	0	99	3	3	3	-.730744917834469	3.27272727272727	3.875	2.88235294117647	.37037037037037	.333333333333333	.148148148148148	.518518518518518	9	9	9	0	0
1020830	0	99	3	5	3	-.729825635771368	2.90909090909091	3.75	3.5	.62962962962963	.481481481481481	.407407407407407	.62962962962963	9	12	12	0	0
1017980	1	12.4106776180698	3	3	4	-.716956484075814	4.09090909090909	4	2.55555555555556	.222222222222222	.259259259259259	.481481481481481	.555555555555556	9	9	9	0	0
1026560	0	12.8240930869268	4	3	3	-.71446815993359	3.27272727272727	4.5	2.16666666666667	.333333333333333	.592592592592593	.740740740740741	.296296296296296	12	9	12	0	0
1022790	0	99	5	5	3	-.702955382693017	2.27272727272727	4.125	2.33333333333333	.888888888888889	.444444444444444	.259259259259259	.444444444444444	12	12	12	0	0
1019090	0	12.7967145790554	3	2	3	-.672118666658592	1.72727272727273	3.25	3.22222222222222	.28	.423076923076923	.269230769230769	.037037037037037	9	6	9	0	0
1019660	1	12.4052019164956	3	5	3	-.666640630228729	4.81818181818182	4.625	2.11111111111111	.481481481481481	.185185185185185	.37037037037037	.148148148148148	9	12	12	0	0
1023790	0	12.6652977412731	6	4	3	-.659011123882389	3.63636363636364	3	3.44444444444444	.555555555555556	.814814814814815	99	.851851851851852	15	12	15	0	0
1025080	0	12.5530458590007	5	3	2	-.656432004883004	4.18181818181818	4.875	3.22222222222222	.518518518518518	.592592592592593	.592592592592593	.666666666666667	12	9	12	0	0
1023590	0	13.2566735112936	3	3	3	-.644276500772399	1.63636363636364	1.5	2.22222222222222	1.18518518518519	.555555555555556	.333333333333333	.37037037037037	9	9	9	0	0
1025650	0	13.5222450376454	3	3	4	-.640802649076637	4.27272727272727	4.5	3.5	.777777777777778	.777777777777778	.777777777777778	.740740740740741	9	9	9	0	0
1020060	0	12.8131416837782	3	3	4	-.636890619966515	4	3.5	2.94444444444444	.851851851851852	.740740740740741	.259259259259259	.37037037037037	9	9	9	0	0
1018160	0	99	4	4	3	-.632857432053083	3.36363636363636	1	3.66666666666667	1.2962962962963	1.59259259259259	1.59259259259259	1.37037037037037	12	12	12	0	0
1025940	0	13.4647501711157	5	5	2	-.629424043680142	3.90909090909091	3.625	3	.259259259259259	.555555555555556	.653846153846154	.423076923076923	12	12	12	0	0
1018390	0	14.1711156741958	5	5	3	-.626815875486959	2.27272727272727	3.625	3.94444444444444	1.33333333333333	.555555555555556	.62962962962963	.814814814814815	12	12	12	0	0
1024970	0	12.4873374401095	5	3	3	-.626086379605481	3.09090909090909	3.625	3	.615384615384615	.962962962962963	.740740740740741	99	12	9	12	0	0
1026300	0	13.2758384668036	2	2	3	-.623923466157929	2.81818181818182	2.25	3.83333333333333	.37037037037037	1.18518518518519	.814814814814815	.666666666666667	6	6	6	0	0
1017740	0	13.1937029431896	3	3	3	-.614041018796034	4	3.875	3.11111111111111	.222222222222222	.296296296296296	.555555555555556	.777777777777778	9	9	9	0	0
1017840	1	13.7522245037645	3	3	3	-.607215546850133	2.72727272727273	3.125	2.55555555555556	.444444444444444	.481481481481481	.518518518518518	.444444444444444	9	9	9	0	0
1021470	0	15.8685831622177	2	2	4	-.596995048555734	3.90909090909091	2.75	2.77777777777778	.481481481481481	.333333333333333	.296296296296296	.259259259259259	6	6	6	0	0
1022200	1	12.8651608487337	2	3	3	-.593870095345708	3.36363636363636	3.625	3.72222222222222	.407407407407407	.185185185185185	.222222222222222	.407407407407407	6	9	9	0	0
1018170	1	12.6817248459959	5	5	3	-.592052161934964	2.81818181818182	4	2.16666666666667	.62962962962963	.444444444444444	.592592592592593	.592592592592593	12	12	12	0	0
1023970	0	12.2929500342231	5	3	3	-.590386686378714	4.63636363636364	2	4.33333333333333	.333333333333333	.407407407407407	99	99	12	9	12	0	0
1019300	0	12.2710472279261	2	5	3	-.583665106582268	4	4.25	2.11111111111111	.259259259259259	.222222222222222	.0434782608695652	.111111111111111	6	12	12	0	0
1023080	1	13.2073921971253	3	5	3	-.58073853251114	4.72727272727273	4	1.61111111111111	.423076923076923	.666666666666667	.592592592592593	.0740740740740741	9	12	12	0	0
1025590	0	13.2922655715264	99	99	99	-.579183423220185	4.18181818181818	1.75	4.22222222222222	.518518518518518	.592592592592593	.222222222222222	.62962962962963	99	99	99	0	0
1019830	0	11.8822724161533	3	3	3	-.574302695546967	2.45454545454545	3.25	1.94444444444444	.962962962962963	1.14814814814815	99	99	9	9	9	0	0
1020870	0	11.4852840520192	2	5	3	-.573152642248046	2.27272727272727	2.85714285714286	2.05555555555556	.846153846153846	.666666666666667	.481481481481481	.62962962962963	6	12	12	0	0
1020310	1	12.0328542094456	3	3	4	-.565251218162228	4	4.75	2.22222222222222	.333333333333333	.888888888888889	.888888888888889	.740740740740741	9	9	9	0	0
1026130	0	12.8268309377139	6	5	2	-.555473509660839	3.27272727272727	3.125	2.77777777777778	.518518518518518	1.22222222222222	.407407407407407	.555555555555556	15	12	15	0	0
1023670	1	12.3778234086242	3	3	4	-.544253988974648	4.09090909090909	3.75	1.88235294117647	.333333333333333	.62962962962963	99	.481481481481481	9	9	9	0	0
1021590	0	12.5639972621492	3	3	4	-.542053937068535	3.09090909090909	3.25	3.29411764705882	.333333333333333	.222222222222222	.259259259259259	.222222222222222	9	9	9	0	0
1019380	0	12.9418206707734	3	3	3	-.532361851699883	4	3.25	4.05555555555556	.925925925925926	.740740740740741	.703703703703704	.666666666666667	9	9	9	0	0
1018950	0	12.5722108145106	3	3	3	-.522692493469374	2.72727272727273	2.875	4.72222222222222	.222222222222222	1	1.2962962962963	1	9	9	9	0	0
1024040	0	12.9144421629021	5	5	3	-.521788479761542	4.63636363636364	4.125	3.44444444444444	.518518518518518	.740740740740741	.925925925925926	.888888888888889	12	12	12	0	0
1023540	0	12.5968514715948	3	3	3	-.514232848883277	3.54545454545455	4.5	3.5	.222222222222222	.259259259259259	.222222222222222	.333333333333333	9	9	9	0	0
1023170	0	12.4709103353867	6	4	4	-.505866534433808	3.81818181818182	4	1.33333333333333	.296296296296296	.222222222222222	.259259259259259	.259259259259259	15	12	15	0	0
1025510	0	12.2929500342231	1	2	5	-.49405017227382	3.09090909090909	2.5	3.05555555555556	.962962962962963	.925925925925926	99	99	0	6	6	0	0
1021310	0	13.6755646817248	2	3	4	-.48721219479849	3.36363636363636	2.5	4.33333333333333	.962962962962963	1.22222222222222	1.22222222222222	.666666666666667	6	9	9	0	0
1023820	0	12.9445585215606	2	2	3	-.479746747327246	2.72727272727273	5	2.22222222222222	.111111111111111	.037037037037037	.296296296296296	.333333333333333	6	6	6	0	0
1025920	0	12.8158795345654	3	3	4	-.470100788940908	3.90909090909091	3	3.05555555555556	.222222222222222	.851851851851852	.851851851851852	.888888888888889	9	9	9	0	0
1021780	0	13.2375085557837	3	3	3	-.468378382761887	2.36363636363636	3.25	1.83333333333333	.259259259259259	.259259259259259	.296296296296296	.148148148148148	9	9	9	0	0
1024750	0	13.719370294319	3	3	2	-.466180427496765	4.3	4.125	2.22222222222222	.333333333333333	.296296296296296	.333333333333333	99	9	9	9	0	0
1020680	0	99	3	3	3	-.465690942409866	3.72727272727273	2.125	1.88888888888889	.444444444444444	.222222222222222	.222222222222222	.185185185185185	9	9	9	0	0
1023110	0	12.9171800136893	5	5	3	-.451475576729774	4.36363636363636	4.5	2.94444444444444	.259259259259259	.296296296296296	.481481481481481	.444444444444444	12	12	12	0	0
1020200	0	13.2101300479124	3	4	3	-.445767761601145	2	2	3	.111111111111111	.555555555555556	.814814814814815	.518518518518518	9	12	12	0	0
1019130	1	13.4592744695414	3	5	3	-.440154800415004	4.63636363636364	2.875	3.88888888888889	.592592592592593	.740740740740741	.518518518518518	.481481481481481	9	12	12	0	0
1021530	1	12.5448323066393	5	2	3	-.439039032507517	3.18181818181818	3.25	3.61111111111111	.481481481481481	.333333333333333	.333333333333333	.259259259259259	12	6	12	0	0
1018490	1	12.6132785763176	3	3	3	-.43586780808335	4.63636363636364	3.25	2.61111111111111	.111111111111111	.37037037037037	.037037037037037	.037037037037037	9	9	9	0	0
1026110	0	12.3696098562628	6	6	2	-.431044638943761	5	4.625	4.38888888888889	.222222222222222	.555555555555556	.259259259259259	.296296296296296	15	15	15	0	0
1021960	0	99	6	4	4	-.425500189959551	4.81818181818182	4.875	3.16666666666667	.555555555555556	.62962962962963	1.14814814814815	.592592592592593	15	12	15	0	0
1025230	0	12.1752224503765	5	2	4	-.421515299074564	4.09090909090909	3.5	2.88888888888889	.666666666666667	.481481481481481	.230769230769231	.111111111111111	12	6	12	0	0
1019800	0	12.8131416837782	6	5	3	-.418687166840279	3.54545454545455	3.25	3	1.03703703703704	1.07407407407407	1.07407407407407	.777777777777778	15	12	15	0	0
1022520	0	13.223819301848	5	4	2	-.414956859115352	3.09090909090909	3.125	2.88888888888889	.703703703703704	.703703703703704	.814814814814815	.814814814814815	12	12	12	0	0
1024960	1	13.0896646132786	3	3	4	-.404532378339293	3.36363636363636	3.25	2.22222222222222	.740740740740741	.592592592592593	.481481481481481	.740740740740741	9	9	9	0	0
1023800	0	12.7583846680356	4	3	3	-.403237196407307	3.36363636363636	3.25	2.94444444444444	.423076923076923	.222222222222222	.481481481481481	.185185185185185	12	9	12	0	0
1017460	0	12.5010266940452	3	3	3	-.401597431866722	4.63636363636364	4.25	2.66666666666667	.259259259259259	.333333333333333	.037037037037037	0	9	9	9	0	0
1020370	0	13.0184804928131	4	6	2	-.401431866141073	4.54545454545455	4.25	3.77777777777778	.185185185185185	.481481481481481	.222222222222222	.111111111111111	12	15	15	0	0
1020490	1	12.3997262149213	5	3	2	-.387191779966916	3.81818181818182	4.25	2.55555555555556	.481481481481481	.407407407407407	.333333333333333	.296296296296296	12	9	12	0	0
1020510	1	13.6016427104723	3	3	3	-.386966940518687	3.18181818181818	2.625	2.5	.444444444444444	.888888888888889	.777777777777778	.962962962962963	9	9	9	0	0
1017680	1	99	4	4	3	-.381535680514582	2.36363636363636	3	2.94444444444444	.962962962962963	.592592592592593	.62962962962963	.296296296296296	12	12	12	0	0
1021940	0	12.7446954140999	2	3	4	-.379053282884116	2.45454545454545	3	3.11111111111111	.481481481481481	99	99	99	6	9	9	0	0
1021550	1	12.2162902121834	5	3	3	-.365016387384291	3.81818181818182	3.625	2.33333333333333	.185185185185185	.111111111111111	.037037037037037	.296296296296296	12	9	12	0	0
1019120	1	12.8158795345654	8	6	3	-.361914263029818	4.45454545454545	4.25	2.16666666666667	.296296296296296	.222222222222222	.185185185185185	.222222222222222	19	15	19	0	0
1025140	1	12.9911019849418	3	3	4	-.35911311775055	3.54545454545455	4	2.88888888888889	.185185185185185	.111111111111111	.148148148148148	.148148148148148	9	9	9	0	0
1026620	0	12.8788501026694	1	1	3	-.353049171876819	4.27272727272727	4	2.66666666666667	.37037037037037	.037037037037037	.222222222222222	.296296296296296	0	0	0	0	0
1020250	1	12.5119780971937	3	3	3	-.350490392954104	5	4.5	4.77777777777778	.62962962962963	.814814814814815	.814814814814815	1.07407407407407	9	9	9	0	0
1025260	0	12.788501026694	3	5	3	-.344265382373586	3.27272727272727	4.25	2.11764705882353	.407407407407407	.518518518518518	.333333333333333	.296296296296296	9	12	12	0	0
1026020	1	13.0951403148528	3	3	4	-.342320621546074	2.36363636363636	2.375	4.55555555555556	.62962962962963	.481481481481481	.592592592592593	.777777777777778	9	9	9	0	0
1025100	1	12.3696098562628	3	2	4	-.334691896883379	3.54545454545455	2	3.83333333333333	1.14814814814815	1.03703703703704	.592592592592593	.666666666666667	9	6	9	0	0
1021100	0	12.3832991101985	4	5	3	-.329985400946385	3.72727272727273	3.125	3	.555555555555556	.333333333333333	.851851851851852	1.48148148148148	12	12	12	0	0
1018210	0	12.5694729637235	3	6	2	-.325850153155777	2.72727272727273	3.875	3.05555555555556	.444444444444444	.777777777777778	1.18518518518519	99	9	15	15	0	0
1020260	0	12.2217659137577	3	3	4	-.324997146242333	3.36363636363636	3.25	2.38888888888889	.407407407407407	.259259259259259	.185185185185185	.222222222222222	9	9	9	0	0
1023310	1	12.9828884325804	3	3	3	-.324966885358246	2.54545454545455	3.5	2.22222222222222	1	.925925925925926	1.07407407407407	1.25925925925926	9	9	9	0	0
1022100	1	12.9199178644764	3	3	3	-.31336597898611	3.36363636363636	3.5	1.55555555555556	.592592592592593	.481481481481481	.444444444444444	.481481481481481	9	9	9	0	0
1026070	1	12.4052019164956	3	3	5	-.306861596777069	3.18181818181818	3.75	2.11111111111111	.333333333333333	.333333333333333	.555555555555556	.407407407407407	9	9	9	0	0
1018220	0	12.0657084188912	7	6	3	-.301536197634877	3.09090909090909	4.125	2.77777777777778	.407407407407407	.592592592592593	.62962962962963	1.03703703703704	16	15	16	0	0
1017350	0	12.2381930184805	3	5	3	-.300023373158944	2.81818181818182	2.125	3.44444444444444	.703703703703704	.851851851851852	.62962962962963	.333333333333333	9	12	12	0	0
1022210	0	13.9986310746064	3	3	3	-.297454258461505	3.90909090909091	2.875	2.61111111111111	.222222222222222	.333333333333333	.962962962962963	.333333333333333	9	9	9	0	0
1018670	0	12.8815879534565	3	3	4	-.293379268180373	3	4.5	2.83333333333333	.111111111111111	0	.259259259259259	.185185185185185	9	9	9	0	0
1024670	1	13.0595482546201	5	6	3	-.289311717350524	4.09090909090909	4.75	2.33333333333333	.384615384615385	.37037037037037	.333333333333333	.444444444444444	12	15	15	0	0
1022870	0	13.637234770705	3	3	4	-.286748948399609	2.27272727272727	3.375	2.44444444444444	.592592592592593	.814814814814815	.814814814814815	.791666666666667	9	9	9	0	0
1025660	0	13.0376454483231	99	99	99	-.27454121810634	3.81818181818182	4.75	2.94444444444444	.37037037037037	.407407407407407	.148148148148148	.296296296296296	99	99	99	0	0
1018150	1	12.8980150581793	6	6	3	-.273446305008686	3	2.875	3.16666666666667	.888888888888889	1.14814814814815	.925925925925926	.740740740740741	15	15	15	0	0
1019410	0	12.5886379192334	99	99	5	-.264625074390124	3	3	3	.962962962962963	.740740740740741	.481481481481481	.555555555555556	99	99	99	0	0
1023720	1	13.6290212183436	3	3	3	-.263864957950988	3.63636363636364	3.75	4.38888888888889	.62962962962963	.888888888888889	.740740740740741	.703703703703704	9	9	9	0	0
1024480	0	13.0020533880903	3	3	3	-.263440116886816	3.72727272727273	2.25	2.22222222222222	.222222222222222	.259259259259259	.222222222222222	.111111111111111	9	9	9	0	0
1023060	1	12.9801505817933	3	3	3	-.262598121631401	3.45454545454545	4.125	2.44444444444444	.444444444444444	.703703703703704	.703703703703704	.407407407407407	9	9	9	0	0
1026310	1	12.3832991101985	3	3	3	-.254430903577706	2.54545454545455	3.875	1.94444444444444	.37037037037037	.444444444444444	.518518518518518	.68	9	9	9	0	0
1024450	0	99	4	3	4	-.254388324317512	3.45454545454545	3.25	2.27777777777778	.333333333333333	.444444444444444	.259259259259259	.407407407407407	12	9	12	0	0
1019550	1	12.5776865160849	3	3	4	-.25082366694682	3.27272727272727	2.875	2.70588235294118	.407407407407407	.740740740740741	.851851851851852	1	9	9	9	0	0
1019630	0	12.7173169062286	3	4	3	-.246894267607518	3.54545454545455	4.5	2.94444444444444	.444444444444444	.592592592592593	.296296296296296	99	9	12	12	0	0
1019960	1	12.5010266940452	5	5	3	-.242161670329496	3.81818181818182	3.375	2.38888888888889	.851851851851852	.481481481481481	.703703703703704	.777777777777778	12	12	12	0	0
1019990	0	12.8323066392882	5	5	1	-.239902506230599	3.81818181818182	4.75	1.66666666666667	.333333333333333	.481481481481481	.518518518518518	.148148148148148	12	12	12	0	0
1022030	0	12.8980150581793	7	4	2	-.231732148018298	3.63636363636364	3.25	2.55555555555556	.185185185185185	.222222222222222	.407407407407407	.185185185185185	16	12	16	0	0
1026630	0	13.5770020533881	3	5	3	-.221398171676267	3.90909090909091	4.875	3.5	.925925925925926	1	.592592592592593	.777777777777778	9	12	12	0	0
1024700	0	13.0102669404517	3	3	3	-.218528943725743	3.9	2.875	2.77777777777778	.666666666666667	.592592592592593	.703703703703704	.777777777777778	9	9	9	0	0
1021110	1	12.37234770705	3	5	3	-.215936179386622	4.63636363636364	5	2.77777777777778	.296296296296296	.37037037037037	99	.703703703703704	9	12	12	0	0
1024190	0	12.9609856262834	5	3	3	-.215852610879027	3.27272727272727	3.25	4.16666666666667	.740740740740741	.555555555555556	.222222222222222	.259259259259259	12	9	12	0	0
1018090	0	12.9281314168378	4	5	3	-.213784727180418	4.27272727272727	5	4.22222222222222	.444444444444444	.259259259259259	.481481481481481	.555555555555556	12	12	12	0	0
1019240	1	99	3	3	1	-.21220023214306	4	4.125	4.16666666666667	.481481481481481	.481481481481481	99	99	9	9	9	0	0
1017580	1	12.5859000684463	2	5	4	-.210807278938143	3.27272727272727	2.5	3.33333333333333	.666666666666667	1.14814814814815	1	.592592592592593	6	12	12	0	0
1019670	1	13.0376454483231	3	4	4	-.209663847712661	3.09090909090909	1.125	3.88888888888889	.481481481481481	1.22222222222222	1	99	9	12	12	0	0
1022710	1	13.0212183436003	3	3	3	-.205928833400839	3.63636363636364	4.125	2.72222222222222	.444444444444444	.407407407407407	.222222222222222	.333333333333333	9	9	9	0	0
1026220	1	12.9609856262834	3	3	3	-.198162367462833	3	3.75	4.77777777777778	.814814814814815	1.40740740740741	.807692307692308	.888888888888889	9	9	9	0	0
1024950	0	12.9363449691992	4	4	3	-.191129944368452	4.81818181818182	3.75	3.94444444444444	.333333333333333	.407407407407407	.259259259259259	.222222222222222	12	12	12	0	0
1018910	0	13.0677618069815	5	5	5	-.179721280795077	3.18181818181818	3.125	2.61111111111111	.407407407407407	.592592592592593	.37037037037037	.592592592592593	12	12	12	0	0
1026470	0	12.8898015058179	3	3	4	-.178633289640341	3.63636363636364	3.875	2.83333333333333	.592592592592593	.407407407407407	.259259259259259	.222222222222222	9	9	9	0	0
1023770	0	14.0123203285421	7	5	1	-.175024092675151	3.18181818181818	3.5	2.72222222222222	.111111111111111	1.03703703703704	1.07407407407407	.962962962962963	16	12	16	0	0
1018920	0	13.0047912388775	6	4	3	-.174754859471772	2.72727272727273	2.875	2.38888888888889	.185185185185185	.333333333333333	.407407407407407	.444444444444444	15	12	15	0	0
1018450	0	12.498288843258	3	3	4	-.169115914265975	2.90909090909091	2.625	2.22222222222222	.333333333333333	.481481481481481	99	99	9	9	9	0	0
1019950	0	12.8240930869268	4	4	4	-.168902282940414	3.81818181818182	3.75	2.38888888888889	.111111111111111	.0740740740740741	99	.148148148148148	12	12	12	0	0
1025010	0	13.6208076659822	5	3	3	-.14817220567628	3.63636363636364	3.75	3.05555555555556	.444444444444444	.962962962962963	99	99	12	9	12	0	0
1020010	1	12.5722108145106	3	5	3	-.146900932890044	3.18181818181818	2	2.16666666666667	.555555555555556	1.14814814814815	.703703703703704	1	9	12	12	0	0
1023120	0	13.8398357289528	3	3	3	-.146404093228591	3.72727272727273	4.375	2.88888888888889	.296296296296296	.407407407407407	.148148148148148	.148148148148148	9	9	9	0	0
1020600	1	13.3744010951403	2	3	5	-.138528390419937	2.90909090909091	1.625	3.38888888888889	.814814814814815	.814814814814815	.555555555555556	.185185185185185	6	9	9	0	0
1021500	0	13.7686516084873	6	5	1	-.134460360925553	4.81818181818182	4.875	2.66666666666667	.407407407407407	.592592592592593	.185185185185185	.296296296296296	15	12	15	0	0
1024630	1	13.0266940451745	3	99	3	-.132943729100124	3.45454545454545	4	2.38888888888889	.962962962962963	1.11111111111111	1.07407407407407	.555555555555556	9	99	99	0	0
1022160	0	12.6598220396988	3	3	3	-.131374612832287	4	3.375	1.38888888888889	.333333333333333	.296296296296296	.259259259259259	.333333333333333	9	9	9	0	0
1021490	0	12.4681724845996	3	3	4	-.128199093444908	3.18181818181818	3	2.61111111111111	.592592592592593	.666666666666667	.259259259259259	.407407407407407	9	9	9	0	0
1018320	0	12.8186173853525	5	3	3	-.127822963867692	3.18181818181818	3.5	3.27777777777778	.666666666666667	.777777777777778	.925925925925926	.481481481481481	12	9	12	0	0
1021570	1	13.3251197809719	3	3	4	-.127597958505936	4.36363636363636	4.5	3.66666666666667	.333333333333333	.296296296296296	.148148148148148	.111111111111111	9	9	9	0	0
1019260	1	12.8240930869268	3	5	3	-.125690814597411	3.81818181818182	3.5	2.27777777777778	.703703703703704	.37037037037037	.444444444444444	.62962962962963	9	12	12	0	0
1019220	0	13.1937029431896	3	3	4	-.124321913957928	3.72727272727273	2.625	2.61111111111111	.888888888888889	99	99	99	9	9	9	0	0
1024120	0	13.3853524982888	3	2	4	-.123819795469358	3.8	4.75	2.44444444444444	.962962962962963	1.14814814814815	.703703703703704	1.40740740740741	9	6	9	0	0
1020350	1	13.1279945242984	3	3	3	-.122336704248238	3.81818181818182	4.5	1.38888888888889	.407407407407407	.555555555555556	.333333333333333	.296296296296296	9	9	9	0	0
1021650	0	11.6084873374401	3	5	4	-.119488867196326	3.36363636363636	4.25	2.66666666666667	.296296296296296	.62962962962963	.666666666666667	.851851851851852	9	12	12	0	0
1025030	1	99	3	3	3	-.118408109111194	3.81818181818182	3.25	3.55555555555556	.592592592592593	.407407407407407	.444444444444444	.148148148148148	9	9	9	0	0
1017550	0	12.5311430527036	5	3	3	-.116787183799286	2.90909090909091	2.25	3.55555555555556	.62962962962963	.666666666666667	.703703703703704	.62962962962963	12	9	12	0	0
1023810	0	12.4572210814511	3	3	2	-.111063481170141	3.81818181818182	4.75	2.38888888888889	.481481481481481	.814814814814815	.592592592592593	.481481481481481	9	9	9	0	0
1026610	1	12.9965776865161	5	5	2	-.110651808353672	4.09090909090909	4.625	1.61111111111111	.481481481481481	.222222222222222	.296296296296296	.111111111111111	12	12	12	0	0
1023950	1	12.5585215605749	3	3	3	-.101800629211569	4.18181818181818	4.5	4.55555555555556	.555555555555556	.444444444444444	.777777777777778	.592592592592593	9	9	9	0	0
1020190	0	13.4401095140315	3	3	3	-.0990937461937861	2.81818181818182	2.75	2.94444444444444	.259259259259259	.37037037037037	.444444444444444	.592592592592593	9	9	9	0	0
1021060	1	12.6652977412731	3	3	1	-.0895459752733349	3.54545454545455	4.125	2.38888888888889	.259259259259259	.222222222222222	.0740740740740741	.185185185185185	9	9	9	0	0
1020150	1	13.3497604380561	3	3	4	-.0851540461833847	3.36363636363636	4.25	1.5	.481481481481481	.666666666666667	.333333333333333	.518518518518518	9	9	9	0	0
1023760	0	13.3415468856947	3	3	3	-.0840404613584399	4.36363636363636	2.25	2.5	.518518518518518	.481481481481481	.5	.407407407407407	9	9	9	0	0
1018330	1	12.8268309377139	5	5	2	-.0829147697271369	3.18181818181818	4.75	3.05555555555556	.37037037037037	.222222222222222	.481481481481481	.555555555555556	12	12	12	0	0
1023560	0	13.2621492128679	3	3	2	-.0820011370891081	3.63636363636364	3.25	2.61111111111111	.333333333333333	.259259259259259	.814814814814815	.62962962962963	9	9	9	0	0
1025430	1	12.6598220396988	3	3	5	-.0784621587702407	3.81818181818182	2.875	2.77777777777778	.62962962962963	.777777777777778	.740740740740741	99	9	9	9	0	0
1025210	1	12.8596851471595	5	5	3	-.0782053462600656	4	4.75	2.5	.222222222222222	.296296296296296	.423076923076923	.407407407407407	12	12	12	0	0
1022530	1	13.2402464065708	2	3	3	-.0757683704356276	2.90909090909091	3	1.88888888888889	.777777777777778	.925925925925926	.592592592592593	1.03703703703704	6	9	9	0	0
1022550	0	12.6899383983573	3	3	3	-.0662590655184278	2.63636363636364	2.625	3.77777777777778	.37037037037037	.814814814814815	.888888888888889	.814814814814815	9	9	9	0	0
1023130	0	99	5	5	3	-.0621703032152164	4.36363636363636	4.875	2.5	.814814814814815	.851851851851852	.62962962962963	.730769230769231	12	12	12	0	0
1025840	0	12.5119780971937	3	3	3	-.0608254114401237	5	5	1.88888888888889	.592592592592593	.666666666666667	.444444444444444	.481481481481481	9	9	9	0	0
1020670	0	12.4517453798768	5	5	4	-.0581167383656999	3.54545454545455	3.75	2.88888888888889	1.07407407407407	.740740740740741	.962962962962963	1	12	12	12	0	0
1024200	1	13.6098562628337	2	3	3	-.0519670879709466	3.36363636363636	3.75	3.33333333333333	.777777777777778	.851851851851852	.925925925925926	.666666666666667	6	9	9	0	0
1023750	1	13.2292950034223	5	3	3	-.0513047778200129	3.63636363636364	4.5	2.22222222222222	.740740740740741	.740740740740741	.555555555555556	.555555555555556	12	9	12	0	0
1018710	0	13.2073921971253	4	3	4	-.0342384533839453	4	5	3.55555555555556	.481481481481481	.555555555555556	1	.740740740740741	12	9	12	0	0
1025060	0	12.5886379192334	3	3	5	-.0294183373831629	3.2	2.375	3.05555555555556	.555555555555556	.8	.37037037037037	.37037037037037	9	9	9	0	0
1019590	1	13.1170431211499	2	2	3	-.0258870832972563	5	4.875	4	.296296296296296	.0740740740740741	.592592592592593	.37037037037037	6	6	6	0	0
1022540	0	13.1307323750856	5	5	3	-.0257112068191105	2.18181818181818	1.125	1.44444444444444	.962962962962963	.814814814814815	.851851851851852	.555555555555556	12	12	12	0	0
1024820	1	13.4318959616701	6	2	3	-.0246968733590573	3.18181818181818	3.25	2.33333333333333	.518518518518518	.703703703703704	.888888888888889	.481481481481481	15	6	15	0	0
1024930	0	13.0485968514716	3	2	5	-.0222484448096769	3.81818181818182	4.625	3.22222222222222	.555555555555556	.555555555555556	.444444444444444	.37037037037037	9	6	9	0	0
1024010	0	12.7008898015058	3	3	4	-.0166479716871884	3.54545454545455	3.625	1.88888888888889	.407407407407407	.62962962962963	.37037037037037	.37037037037037	9	9	9	0	0
1024490	0	12.8925393566051	5	5	4	-.0124386086540902	4	5	1.88888888888889	.592592592592593	.407407407407407	.185185185185185	.222222222222222	12	12	12	0	0
1025190	0	12.5311430527036	3	3	3	-.0120557503531143	3.36363636363636	3.375	3	.703703703703704	.37037037037037	.296296296296296	.481481481481481	9	9	9	0	0
1022140	0	12.9472963723477	3	4	4	-.0085048413010157	5	5	2.88888888888889	.666666666666667	.333333333333333	.333333333333333	.481481481481481	9	12	12	0	0
1025500	0	13.2703627652293	7	3	3	-.00591032693033242	4.63636363636364	4.5	3.61111111111111	.185185185185185	.518518518518518	.222222222222222	.884615384615385	16	9	16	0	0
1020440	0	13.2046543463381	3	5	4	-.00399418272905016	3.27272727272727	1.625	4.77777777777778	.444444444444444	.592592592592593	.481481481481481	.592592592592593	9	12	12	0	0
1019110	0	12.8624229979466	3	3	4	-.00287768422185889	2.36363636363636	4.875	4.61111111111111	.740740740740741	.444444444444444	.481481481481481	.222222222222222	9	9	9	0	0
1018880	1	12.4271047227926	3	5	2	.00434362876545121	2.45454545454545	3.5	2.38888888888889	1.2962962962963	.851851851851852	1.14814814814815	1.18518518518519	9	12	12	0	0
1025420	0	12.7830253251198	3	5	3	.0045777777758506	3.54545454545455	1.625	4.44444444444444	.666666666666667	.296296296296296	.592592592592593	.555555555555556	9	12	12	0	0
1023880	0	99	99	3	5	.00804724643173314	4.36363636363636	4.25	2.33333333333333	.851851851851852	.666666666666667	.925925925925926	.777777777777778	99	9	99	0	0
1019020	0	13.3963039014374	3	3	3	.0190920804350669	3.36363636363636	4.25	1.77777777777778	.962962962962963	.777777777777778	.777777777777778	99	9	9	9	0	0
1026660	1	12.5448323066393	3	3	4	.0208097860432694	3.81818181818182	2.875	2.61111111111111	.777777777777778	.444444444444444	.148148148148148	.814814814814815	9	9	9	0	0
1025440	1	12.9062286105407	3	3	4	.0228523659069471	3.36363636363636	4	2.11111111111111	.185185185185185	.111111111111111	99	.037037037037037	9	9	9	0	0
1024840	1	13.2977412731006	3	1	3	.0232856810323987	2.54545454545455	2.375	4.55555555555556	1.03703703703704	.814814814814815	.851851851851852	.814814814814815	9	0	9	0	0
1026510	0	13.1526351813826	3	5	4	.0236880785562905	2.90909090909091	1.625	3.27777777777778	.666666666666667	.259259259259259	.0740740740740741	.185185185185185	9	12	12	0	0
1017820	1	13.3442847364819	2	2	3	.0253425265850678	2.63636363636364	3.75	3.27777777777778	1.03703703703704	1.07407407407407	1	1.11111111111111	6	6	6	0	0
1023100	0	12.8350444900753	3	3	5	.0263048111597992	4.18181818181818	4.375	2.5	.666666666666667	.481481481481481	.296296296296296	.37037037037037	9	9	9	0	0
1025560	0	13.0759753593429	6	5	2	.0355795403206929	4.09090909090909	4.375	1.66666666666667	.444444444444444	.777777777777778	.222222222222222	.222222222222222	15	12	15	0	0
1025570	1	12.3997262149213	3	1	5	.0363212526147965	4.72727272727273	4.75	2.05555555555556	.518518518518518	.592592592592593	1.40740740740741	.814814814814815	9	0	9	0	0
1026010	1	13.0951403148528	3	3	4	.0375369960014222	4.27272727272727	4.375	4	.481481481481481	.851851851851852	.592592592592593	99	9	9	9	0	0
1023990	0	12.2190280629706	3	3	1	.0464648445061344	4	4	3.61111111111111	.37037037037037	.481481481481481	.37037037037037	.555555555555556	9	9	9	0	0
1024080	0	13.0431211498973	5	3	5	.0465270369223898	3.18181818181818	2.75	3.16666666666667	.37037037037037	.37037037037037	.37037037037037	.703703703703704	12	9	12	0	0
1021660	0	12.9472963723477	5	5	3	.0532791536701142	1.90909090909091	2.625	2.94444444444444	.555555555555556	.777777777777778	.518518518518518	.296296296296296	12	12	12	0	0
1026030	1	11.6632443531828	5	2	3	.055896149517379	4	3.75	2.16666666666667	.666666666666667	.925925925925926	.407407407407407	.37037037037037	12	6	12	0	0
1017940	0	12.8952772073922	5	6	3	.060001196730056	4.18181818181818	3.375	4.77777777777778	1.18518518518519	.888888888888889	.769230769230769	.888888888888889	12	15	15	0	0
1022310	1	12.2327173169062	3	3	4	.0609252817345638	3.90909090909091	4.875	1.61111111111111	.148148148148148	.148148148148148	.185185185185185	.222222222222222	9	9	9	0	0
1022860	1	12.8186173853525	3	3	3	.0755528454604651	3.18181818181818	4.5	2.61111111111111	.444444444444444	.444444444444444	.444444444444444	.37037037037037	9	9	9	0	0
1021840	0	13.2511978097194	3	3	3	.0778733691196564	4.09090909090909	3.375	3.94444444444444	.925925925925926	.851851851851852	.148148148148148	.148148148148148	9	9	9	0	0
1025130	1	12.7720739219713	6	4	3	.0784775504201335	2.90909090909091	2.5	4.55555555555556	1.03703703703704	.777777777777778	.518518518518518	.740740740740741	15	12	15	0	0
1018100	0	13.2484599589322	4	4	3	.0819354825380467	2.54545454545455	3	2.77777777777778	.518518518518518	.555555555555556	.62962962962963	.703703703703704	12	12	12	0	0
1025540	1	12.9418206707734	3	3	4	.0832131761829898	3.54545454545455	2.125	2.61111111111111	1	.925925925925926	1.22222222222222	.925925925925926	9	9	9	0	0
1020410	0	12.974674880219	2	2	4	.0834022232180535	3.27272727272727	1.5	3.83333333333333	1.40740740740741	1.2962962962963	1.11111111111111	1.22222222222222	6	6	6	0	0
1020270	0	13.0759753593429	5	3	5	.0849029818737681	2.72727272727273	2.25	2.22222222222222	.740740740740741	.518518518518518	.37037037037037	.185185185185185	12	9	12	0	0
1017410	1	99	3	3	3	.0872149430308039	3.81818181818182	3.875	2.94444444444444	.407407407407407	.148148148148148	.296296296296296	.444444444444444	9	9	9	0	0
1020340	0	13.2265571526352	3	3	4	.0903197300856254	3.36363636363636	3.5	3.44444444444444	.555555555555556	.208333333333333	.111111111111111	.222222222222222	9	9	9	0	0
1024580	0	13.3032169746749	3	3	3	.0916734373471567	3	3.625	2.88888888888889	.333333333333333	.407407407407407	.62962962962963	.814814814814815	9	9	9	0	0
1022580	1	13.5989048596851	3	2	3	.0919965227021306	3.90909090909091	3.375	1.72222222222222	.037037037037037	.111111111111111	.153846153846154	.0740740740740741	9	6	9	0	0
1017340	0	12.6981519507187	8	8	3	.0922384650239393	3	4.5	1.83333333333333	.222222222222222	.333333333333333	.407407407407407	.37037037037037	19	19	19	0	0
1020160	0	14.321697467488	3	3	3	.0985664858814009	3.54545454545455	4	2.66666666666667	.37037037037037	.62962962962963	.407407407407407	.851851851851852	9	9	9	0	0
1021380	1	13.1033538672142	3	3	4	.104310500915061	4.45454545454545	3.5	1.66666666666667	.962962962962963	.666666666666667	1	.740740740740741	9	9	9	0	0
1026670	0	12.8678986995209	3	3	4	.106370450330816	4.27272727272727	2.375	4.16666666666667	.296296296296296	.37037037037037	.111111111111111	0	9	9	9	0	0
1020880	1	12.1916495550992	3	3	3	.109117120997336	3.45454545454545	3	2.77777777777778	1	.925925925925926	.962962962962963	.962962962962963	9	9	9	0	0
1021760	0	12.684462696783	3	5	3	.109174492060469	4.63636363636364	3.125	1.61111111111111	.259259259259259	.148148148148148	.0740740740740741	.185185185185185	9	12	12	0	0
1022090	0	12.8021902806297	3	6	2	.109892607557372	4.63636363636364	4.25	4.33333333333333	.148148148148148	.111111111111111	.185185185185185	.0740740740740741	9	15	15	0	0
1024320	1	13.5414099931554	5	3	3	.119178741592159	3.8	3.125	2.22222222222222	.222222222222222	.185185185185185	.148148148148148	.222222222222222	12	9	12	0	0
1023280	0	12.4845995893224	6	6	4	.120013964641663	3.18181818181818	3.5	2.27777777777778	.555555555555556	.851851851851852	1.03703703703704	.444444444444444	15	15	15	0	0
1020420	1	13.4537987679671	3	3	3	.122103819697926	3.27272727272727	3.375	2.94444444444444	.481481481481481	.333333333333333	.444444444444444	.888888888888889	9	9	9	0	0
1026490	0	12.8542094455852	3	5	3	.132701894950437	2.63636363636364	1.875	4	1.18518518518519	.851851851851852	1.07407407407407	1.18518518518519	9	12	12	0	0
1017500	0	12.3586584531143	3	3	3	.13272767741926	3.36363636363636	3	2.22222222222222	.185185185185185	.481481481481481	0	0	9	9	9	0	0
1018180	0	13.1937029431896	4	4	3	.133309107406254	5	4.5	3.16666666666667	.333333333333333	.37037037037037	.296296296296296	.444444444444444	12	12	12	0	0
1024920	0	12.3778234086242	5	2	5	.138467714666558	2.63636363636364	2.75	3.72222222222222	.62962962962963	.666666666666667	.407407407407407	.259259259259259	12	6	12	0	0
1024880	1	12.7310061601643	3	3	3	.150662384970729	3.81818181818182	4.125	3.33333333333333	.333333333333333	.703703703703704	.555555555555556	.592592592592593	9	9	9	0	0
1021210	1	13.1115674195756	3	3	3	.155832834124339	4.63636363636364	4.5	2.83333333333333	.185185185185185	.222222222222222	.111111111111111	.185185185185185	9	9	9	0	0
1024980	1	12.6899383983573	3	3	3	.155969928705749	4.63636363636364	3.75	2.22222222222222	.148148148148148	.185185185185185	.185185185185185	.307692307692308	9	9	9	0	0
1019290	0	12.37234770705	4	4	3	.157315694848634	3	4	2.72222222222222	.333333333333333	.555555555555556	.259259259259259	.481481481481481	12	12	12	0	0
1019810	0	12.2546201232033	3	3	4	.157695226173416	3.63636363636364	3.125	3.22222222222222	.666666666666667	1.48148148148148	1.25925925925926	.333333333333333	9	9	9	0	0
[truncated: 577 more rows]
