# Supplementary material for: The Impact of Academic Achievement and Parental Practices on Depressive Symptom Trajectories Among Chinese Adolescents
Source: Res Child Adolesc Psychopathol. 2021 May 13;49(10):1359–71. doi: 10.1007/s10802-021-00826-9 (PMC8380233; doi:10.1007/s10802-021-00826-9)
Supplement: Supplementary file 5 — Supplementary file5 (OUT 25 KB) [file 10802_2021_826_MOESM5_ESM.out]

Mplus VERSION 7.11
MUTHEN & MUTHEN
12/14/2020   4:39 PM

INPUT INSTRUCTIONS

  TITLE: Growth Mixture Model

     DATA: FILE IS depressive trajectories and its predictors.dat;

      VARIABLE:  NAMES ARE IDALL SEX agetest1 F12 F13 F16
      zj1 PRNTIVL1 AUTOSUP1 PSYCTRL1
  DPRS1 DPRS2 DPRS3 DPRS4 FatherEdu MotherEdu Education
  schoolTy1 schoolTy2;

        USEVARIABLES ARE
            DPRS1 DPRS2 DPRS3 DPRS4;

             MISSING=ALL(99);
             CLASSES=c(2);


    ANALYSIS: TYPE= MIXTURE;
    starts = 5000 100;
    MODEL:
             %OVERALL%
             i s | DPRS1@0 DPRS2@1 DPRS3@2 DPRS4@3;
             i with s@0;


    OUTPUT: SAMPSTAT  TECH1  TECH11 TECH14;

    PLOT: TYPE=PLOT3;
          Series=DPRS1 DPRS2 DPRS3 DPRS4 (*);


INPUT READING TERMINATED NORMALLY


Growth Mixture Model

SUMMARY OF ANALYSIS

Number of groups                                                 1
Number of observations                                        2576

Number of dependent variables                                    4
Number of independent variables                                  0
Number of continuous latent variables                            2
Number of categorical latent variables                           1

Observed dependent variables

  Continuous
   DPRS1       DPRS2       DPRS3       DPRS4

Continuous latent variables
   I           S

Categorical latent variables
   C


Estimator                                                      MLR
Information matrix                                        OBSERVED
Optimization Specifications for the Quasi-Newton Algorithm for
Continuous Outcomes
  Maximum number of iterations                                 100
  Convergence criterion                                  0.100D-05
Optimization Specifications for the EM Algorithm
  Maximum number of iterations                                 500
  Convergence criteria
    Loglikelihood change                                 0.100D-06
    Relative loglikelihood change                        0.100D-06
    Derivative                                           0.100D-05
Optimization Specifications for the M step of the EM Algorithm for
Categorical Latent variables
  Number of M step iterations                                    1
  M step convergence criterion                           0.100D-05
  Basis for M step termination                           ITERATION
Optimization Specifications for the M step of the EM Algorithm for
Censored, Binary or Ordered Categorical (Ordinal), Unordered
Categorical (Nominal) and Count Outcomes
  Number of M step iterations                                    1
  M step convergence criterion                           0.100D-05
  Basis for M step termination                           ITERATION
  Maximum value for logit thresholds                            15
  Minimum value for logit thresholds                           -15
  Minimum expected cell size for chi-square              0.100D-01
Maximum number of iterations for H1                           2000
Convergence criterion for H1                             0.100D-03
Optimization algorithm                                         EMA
Random Starts Specifications
  Number of initial stage random starts                       5000
  Number of final stage optimizations                          100
  Number of initial stage iterations                            10
  Initial stage convergence criterion                    0.100D+01
  Random starts scale                                    0.500D+01
  Random seed for generating random starts                       0

Input data file(s)
  depressive trajectories and its predictors.dat
Input data format  FREE


SUMMARY OF DATA

     Number of missing data patterns             9
     Number of y missing data patterns           9
     Number of u missing data patterns           0


COVARIANCE COVERAGE OF DATA

Minimum covariance coverage value   0.100


     PROPORTION OF DATA PRESENT FOR Y


           Covariance Coverage
              DPRS1         DPRS2         DPRS3         DPRS4
              ________      ________      ________      ________
 DPRS1          1.000
 DPRS2          0.975         0.976
 DPRS3          0.941         0.934         0.942
 DPRS4          0.915         0.908         0.899         0.915


SAMPLE STATISTICS


     ESTIMATED SAMPLE STATISTICS


           Means
              DPRS1         DPRS2         DPRS3         DPRS4
              ________      ________      ________      ________
 1              0.492         0.533         0.523         0.525


           Covariances
              DPRS1         DPRS2         DPRS3         DPRS4
              ________      ________      ________      ________
 DPRS1          0.082
 DPRS2          0.056         0.093
 DPRS3          0.049         0.064         0.094
 DPRS4          0.046         0.061         0.068         0.102


           Correlations
              DPRS1         DPRS2         DPRS3         DPRS4
              ________      ________      ________      ________
 DPRS1          1.000
 DPRS2          0.642         1.000
 DPRS3          0.557         0.680         1.000
 DPRS4          0.505         0.623         0.697         1.000


     MAXIMUM LOG-LIKELIHOOD VALUE FOR THE UNRESTRICTED (H1) MODEL IS 113.435

RANDOM STARTS RESULTS RANKED FROM THE BEST TO THE WORST LOGLIKELIHOOD VALUES

Final stage loglikelihood values at local maxima, seeds, and initial stage start numbers:

             167.618  763474           4705
             167.618  37806            4535
             167.618  667455           2558
             167.618  579995           183
             167.618  132524           2316
             167.618  797381           3063
             167.618  895878           1216
             167.618  189515           1616
             167.618  554694           2610
             167.618  227478           2396
             167.618  496762           870
             167.618  807926           2090
             167.618  708207           1158
             167.618  122081           4809
             167.618  293349           2520
             167.618  426708           3987
             167.618  81233            825
             167.618  997513           3727
             167.618  382342           4306
             167.618  548245           818
             167.618  130077           4646
             167.618  89970            223
             167.618  789916           4259
             167.618  494365           1331
             167.618  39136            226
             167.618  483538           1897
             167.618  631196           4440
             167.618  352184           3080
             167.618  172133           1697
             167.618  670281           721
             167.618  668833           2981
             167.618  361694           1834
             167.618  178337           1727
             167.618  351474           3805
             167.618  258756           2111
             167.618  35333            4266
             167.618  266630           3429
             167.618  145431           1920
             167.618  157035           2308
             167.618  721012           4867
             167.618  288476           4193
             167.618  912557           3039
             167.618  83878            2541
             167.618  70157            1858
             167.618  82152            2955
             167.618  299996           1853
             167.618  850840           232
             167.618  260095           3780
             167.618  176723           4904
             167.618  400299           4782
             167.618  441119           2104
             167.618  326697           3797
             167.618  830529           279
             167.618  630467           4639
             167.618  467843           1157
             167.618  719490           1780
             167.618  872342           3765
             167.618  607284           2163
             167.618  446548           3875
             167.618  135              2132
             167.618  291962           2151
             167.618  246794           801
             167.618  938242           2625
             167.618  17896            592
             167.618  825881           2525
             167.618  294228           2942
             167.618  430395           3978
             167.618  705829           2439
             167.618  422747           2730
             167.618  371138           2042
             167.618  140987           1093
             167.618  565763           2231
             167.618  108148           3981
             167.618  282806           2710
             167.618  477409           3957
             167.618  813963           4182
             167.618  758647           951
             167.618  246575           291
             167.618  205005           2559
             167.618  349263           263
             167.618  332693           2655
             167.618  788197           3328
             167.618  374171           2920
             167.618  556929           734
             167.618  267983           228
             167.618  881552           3664
             167.618  68850            462
             167.618  320884           1390
             167.618  525650           3774
             167.618  868155           2204
             167.618  378393           509
             167.618  56662            3270
             167.618  583415           4214
             167.618  599136           811
             167.618  765744           4617
             167.618  2315             2397
             167.618  927789           2742
             167.618  62104            4555
             167.618  594127           1949
             167.618  645664           39


THE BEST LOGLIKELIHOOD VALUE HAS BEEN REPLICATED.  RERUN WITH AT LEAST TWICE THE
RANDOM STARTS TO CHECK THAT THE BEST LOGLIKELIHOOD IS STILL OBTAINED AND REPLICATED.


THE MODEL ESTIMATION TERMINATED NORMALLY


MODEL FIT INFORMATION

Number of Free Parameters                       11

Loglikelihood

          H0 Value                         167.618
          H0 Scaling Correction Factor      1.3999
            for MLR

Information Criteria

          Akaike (AIC)                    -313.236
          Bayesian (BIC)                  -248.842
          Sample-Size Adjusted BIC        -283.792
            (n* = (n + 2) / 24)


FINAL CLASS COUNTS AND PROPORTIONS FOR THE LATENT CLASSES
BASED ON THE ESTIMATED MODEL

    Latent
   Classes

       1        431.24189          0.16741
       2       2144.75811          0.83259


FINAL CLASS COUNTS AND PROPORTIONS FOR THE LATENT CLASS PATTERNS
BASED ON ESTIMATED POSTERIOR PROBABILITIES

    Latent
   Classes

       1        431.24189          0.16741
       2       2144.75811          0.83259


CLASSIFICATION QUALITY

     Entropy                         0.733


CLASSIFICATION OF INDIVIDUALS BASED ON THEIR MOST LIKELY LATENT CLASS MEMBERSHIP

Class Counts and Proportions

    Latent
   Classes

       1              363          0.14092
       2             2213          0.85908


Average Latent Class Probabilities for Most Likely Latent Class Membership (Row)
by Latent Class (Column)

           1        2

    1   0.829    0.171
    2   0.059    0.941


Classification Probabilities for the Most Likely Latent Class Membership (Row)
by Latent Class (Column)

           1        2

    1   0.698    0.302
    2   0.029    0.971


Logits for the Classification Probabilities for the Most Likely Latent Class Membership (Row)
by Latent Class (Column)

              1        2

    1      0.836    0.000
    2     -3.512    0.000


MODEL RESULTS

                                                    Two-Tailed
                    Estimate       S.E.  Est./S.E.    P-Value

Latent Class 1

 I        |
    DPRS1              1.000      0.000    999.000    999.000
    DPRS2              1.000      0.000    999.000    999.000
    DPRS3              1.000      0.000    999.000    999.000
    DPRS4              1.000      0.000    999.000    999.000

 S        |
    DPRS1              0.000      0.000    999.000    999.000
    DPRS2              1.000      0.000    999.000    999.000
    DPRS3              2.000      0.000    999.000    999.000
    DPRS4              3.000      0.000    999.000    999.000

 I        WITH
    S                  0.000      0.000    999.000    999.000

 Means
    I                  0.923      0.026     35.690      0.000
    S                 -0.052      0.012     -4.182      0.000

 Intercepts
    DPRS1              0.000      0.000    999.000    999.000
    DPRS2              0.000      0.000    999.000    999.000
    DPRS3              0.000      0.000    999.000    999.000
    DPRS4              0.000      0.000    999.000    999.000

 Variances
    I                  0.026      0.002     10.910      0.000
    S                  0.005      0.000     14.596      0.000

 Residual Variances
    DPRS1              0.023      0.002     12.070      0.000
    DPRS2              0.033      0.002     20.578      0.000
    DPRS3              0.030      0.002     19.918      0.000
    DPRS4              0.023      0.002     11.021      0.000

Latent Class 2

 I        |
    DPRS1              1.000      0.000    999.000    999.000
    DPRS2              1.000      0.000    999.000    999.000
    DPRS3              1.000      0.000    999.000    999.000
    DPRS4              1.000      0.000    999.000    999.000

 S        |
    DPRS1              0.000      0.000    999.000    999.000
    DPRS2              1.000      0.000    999.000    999.000
    DPRS3              2.000      0.000    999.000    999.000
    DPRS4              3.000      0.000    999.000    999.000

 I        WITH
    S                  0.000      0.000    999.000    999.000

 Means
    I                  0.417      0.009     44.864      0.000
    S                  0.022      0.003      8.325      0.000

 Intercepts
    DPRS1              0.000      0.000    999.000    999.000
    DPRS2              0.000      0.000    999.000    999.000
    DPRS3              0.000      0.000    999.000    999.000
    DPRS4              0.000      0.000    999.000    999.000

 Variances
    I                  0.026      0.002     10.910      0.000
    S                  0.005      0.000     14.596      0.000

 Residual Variances
    DPRS1              0.023      0.002     12.070      0.000
    DPRS2              0.033      0.002     20.578      0.000
    DPRS3              0.030      0.002     19.918      0.000
    DPRS4              0.023      0.002     11.021      0.000

Categorical Latent Variables

 Means
    C#1               -1.604      0.152    -10.588      0.000


QUALITY OF NUMERICAL RESULTS

     Condition Number for the Information Matrix              0.474E-04
       (ratio of smallest to largest eigenvalue)


TECHNICAL 1 OUTPUT


     PARAMETER SPECIFICATION FOR LATENT CLASS 1


           NU
              DPRS1         DPRS2         DPRS3         DPRS4
              ________      ________      ________      ________
 1                  0             0             0             0


           LAMBDA
              I             S
              ________      ________
 DPRS1              0             0
 DPRS2              0             0
 DPRS3              0             0
 DPRS4              0             0


           THETA
              DPRS1         DPRS2         DPRS3         DPRS4
              ________      ________      ________      ________
 DPRS1              1
 DPRS2              0             2
 DPRS3              0             0             3
 DPRS4              0             0             0             4


           ALPHA
              I             S
              ________      ________
 1                  5             6


           BETA
              I             S
              ________      ________
 I                  0             0
 S                  0             0


           PSI
              I             S
              ________      ________
 I                  7
 S                  0             8


     PARAMETER SPECIFICATION FOR LATENT CLASS 2


           NU
              DPRS1         DPRS2         DPRS3         DPRS4
              ________      ________      ________      ________
 1                  0             0             0             0


           LAMBDA
              I             S
              ________      ________
 DPRS1              0             0
 DPRS2              0             0
 DPRS3              0             0
 DPRS4              0             0


           THETA
              DPRS1         DPRS2         DPRS3         DPRS4
              ________      ________      ________      ________
 DPRS1              1
 DPRS2              0             2
 DPRS3              0             0             3
 DPRS4              0             0             0             4


           ALPHA
              I             S
              ________      ________
 1                  9            10


           BETA
              I             S
              ________      ________
 I                  0             0
 S                  0             0


           PSI
              I             S
              ________      ________
 I                  7
 S                  0             8


     PARAMETER SPECIFICATION FOR LATENT CLASS REGRESSION MODEL PART


           ALPHA(C)
              C#1           C#2
              ________      ________
 1                 11             0


     STARTING VALUES FOR LATENT CLASS 1


           NU
              DPRS1         DPRS2         DPRS3         DPRS4
              ________      ________      ________      ________
 1              0.000         0.000         0.000         0.000


           LAMBDA
              I             S
              ________      ________
 DPRS1          1.000         0.000
 DPRS2          1.000         1.000
 DPRS3          1.000         2.000
 DPRS4          1.000         3.000


           THETA
              DPRS1         DPRS2         DPRS3         DPRS4
              ________      ________      ________      ________
 DPRS1          0.041
 DPRS2          0.000         0.047
 DPRS3          0.000         0.000         0.047
 DPRS4          0.000         0.000         0.000         0.051


           ALPHA
              I             S
              ________      ________
 1              0.506         0.015


           BETA
              I             S
              ________      ________
 I              0.000         0.000
 S              0.000         0.000


           PSI
              I             S
              ________      ________
 I              0.079
 S              0.000         0.015


     STARTING VALUES FOR LATENT CLASS 2


           NU
              DPRS1         DPRS2         DPRS3         DPRS4
              ________      ________      ________      ________
 1              0.000         0.000         0.000         0.000


           LAMBDA
              I             S
              ________      ________
 DPRS1          1.000         0.000
 DPRS2          1.000         1.000
 DPRS3          1.000         2.000
 DPRS4          1.000         3.000


           THETA
              DPRS1         DPRS2         DPRS3         DPRS4
              ________      ________      ________      ________
 DPRS1          0.041
 DPRS2          0.000         0.047
 DPRS3          0.000         0.000         0.047
 DPRS4          0.000         0.000         0.000         0.051


           ALPHA
              I             S
              ________      ________
 1              0.506         0.015


           BETA
              I             S
              ________      ________
 I              0.000         0.000
 S              0.000         0.000


           PSI
              I             S
              ________      ________
 I              0.079
 S              0.000         0.015


     STARTING VALUES FOR LATENT CLASS REGRESSION MODEL PART


           ALPHA(C)
              C#1           C#2
              ________      ________
 1              0.000         0.000


TECHNICAL 11 OUTPUT

     Random Starts Specifications for the k-1 Class Analysis Model
        Number of initial stage random starts                5000
        Number of final stage optimizations                   100


     VUONG-LO-MENDELL-RUBIN LIKELIHOOD RATIO TEST FOR 1 (H0) VERSUS 2 CLASSES

          H0 Loglikelihood Value                           59.051
          2 Times the Loglikelihood Difference            217.134
          Difference in the Number of Parameters                3
          Mean                                              6.714
          Standard Deviation                                8.327
          P-Value                                          0.0000

     LO-MENDELL-RUBIN ADJUSTED LRT TEST

          Value                                           208.294
          P-Value                                          0.0000


TECHNICAL 14 OUTPUT

     Random Starts Specifications for the k-1 Class Analysis Model
        Number of initial stage random starts                5000
        Number of final stage optimizations                   100

     Random Starts Specification for the k-1 Class Model for Generated Data
        Number of initial stage random starts                   0
        Number of final stage optimizations for the
           initial stage random starts                          0
     Random Starts Specification for the k Class Model for Generated Data
        Number of initial stage random starts                  40
        Number of final stage optimizations                     8
     Number of bootstrap draws requested                   Varies


     PARAMETRIC BOOTSTRAPPED LIKELIHOOD RATIO TEST FOR 1 (H0) VERSUS 2 CLASSES

          H0 Loglikelihood Value                           59.051
          2 Times the Loglikelihood Difference            217.134
          Difference in the Number of Parameters                3
          Approximate P-Value                              0.0000
          Successful Bootstrap Draws                            5


SAMPLE STATISTICS FOR ESTIMATED FACTOR SCORES


     SAMPLE STATISTICS


           Means
              I             S             C_I           C_S
              ________      ________      ________      ________
 1              0.502         0.010         0.497         0.012


           Covariances
              I             S             C_I           C_S
              ________      ________      ________      ________
 I              0.051
 S             -0.002         0.003
 C_I            0.051        -0.002         0.052
 C_S           -0.002         0.003        -0.002         0.003


           Correlations
              I             S             C_I           C_S
              ________      ________      ________      ________
 I              1.000
 S             -0.148         1.000
 C_I            0.993        -0.164         1.000
 C_S           -0.151         0.981        -0.189         1.000


PLOT INFORMATION

The following plots are available:

  Histograms of sample values
  Histograms of estimated values
  Scatterplots (sample values, estimated factor scores, estimated values)
  Sample means
  Estimated means
  Sample and estimated means
  Latent variable distribution plots
  Observed individual values
  Estimated individual values
  Estimated means and observed individual values
  Estimated means and estimated individual values
  Mixture distributions

DIAGRAM INFORMATION

  Mplus diagrams are currently not available for Mixture analysis.
  No diagram output was produced.


     Beginning Time:  16:39:26
        Ending Time:  16:41:11
       Elapsed Time:  00:01:45


MUTHEN & MUTHEN
3463 Stoner Ave.
Los Angeles, CA  90066

Tel: (310) 391-9971
Fax: (310) 391-8971
Web: www.StatModel.com
Support: Support@StatModel.com

Copyright (c) 1998-2013 Muthen & Muthen
